# Supplementary material
Source: publisher site journal article supplement (https://www.dovepress.com/article/386031)
Supplement: Supplementary file 1 [file get_supplementary_file.php]

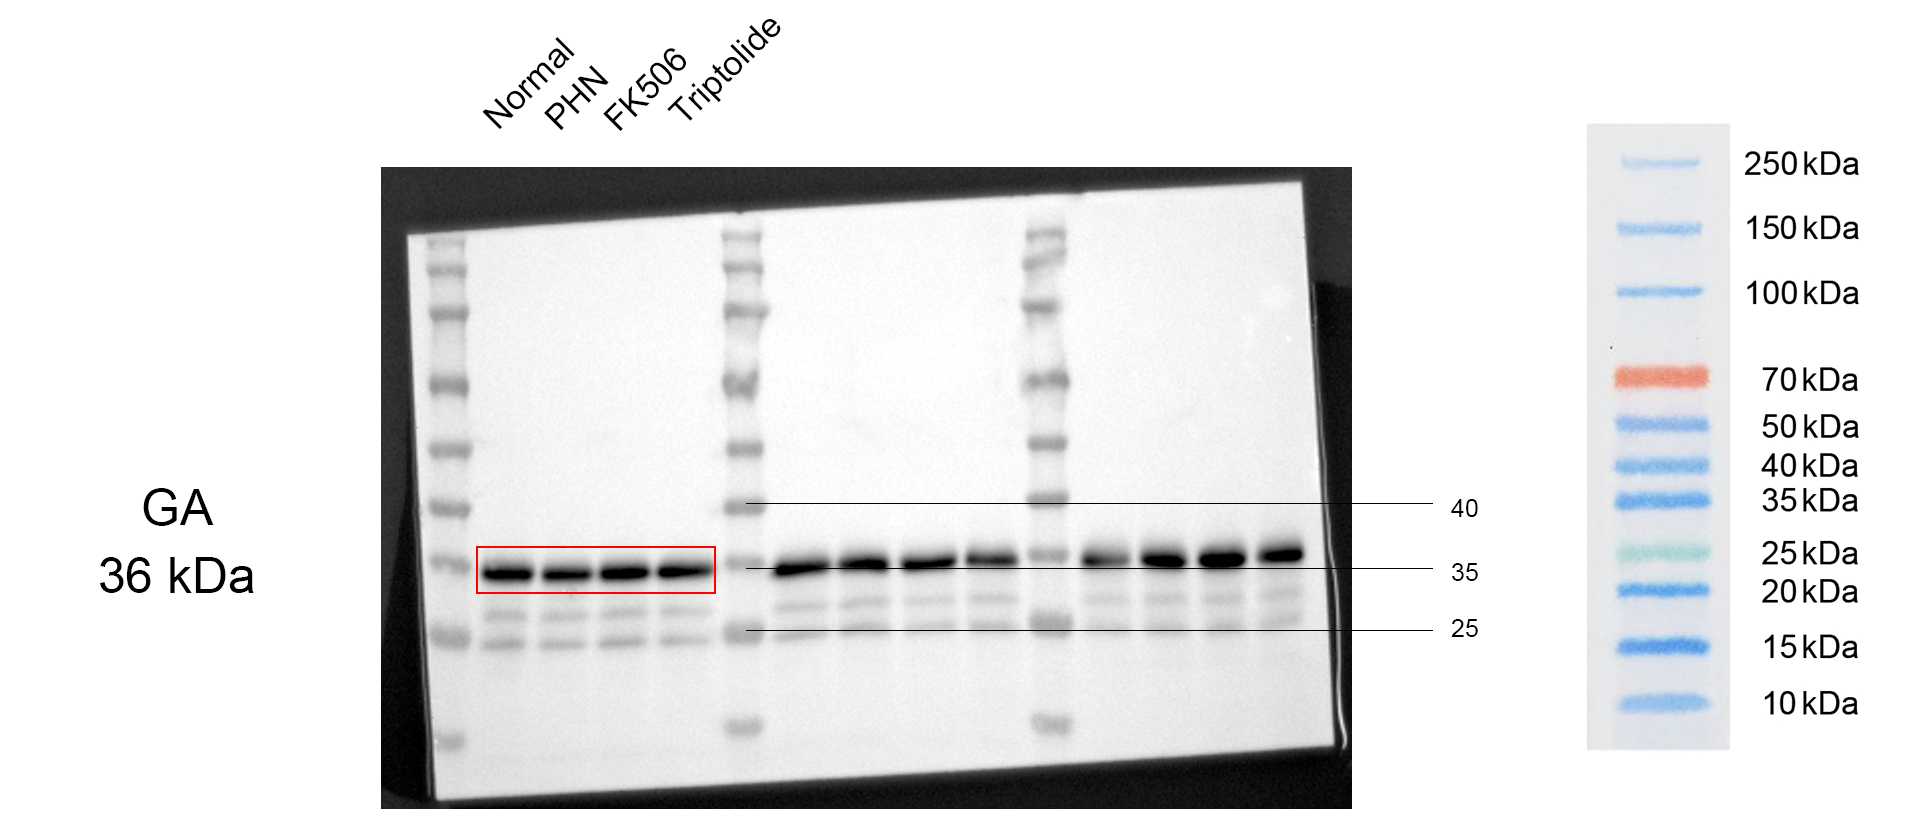


**Figure S1.** GA marker.


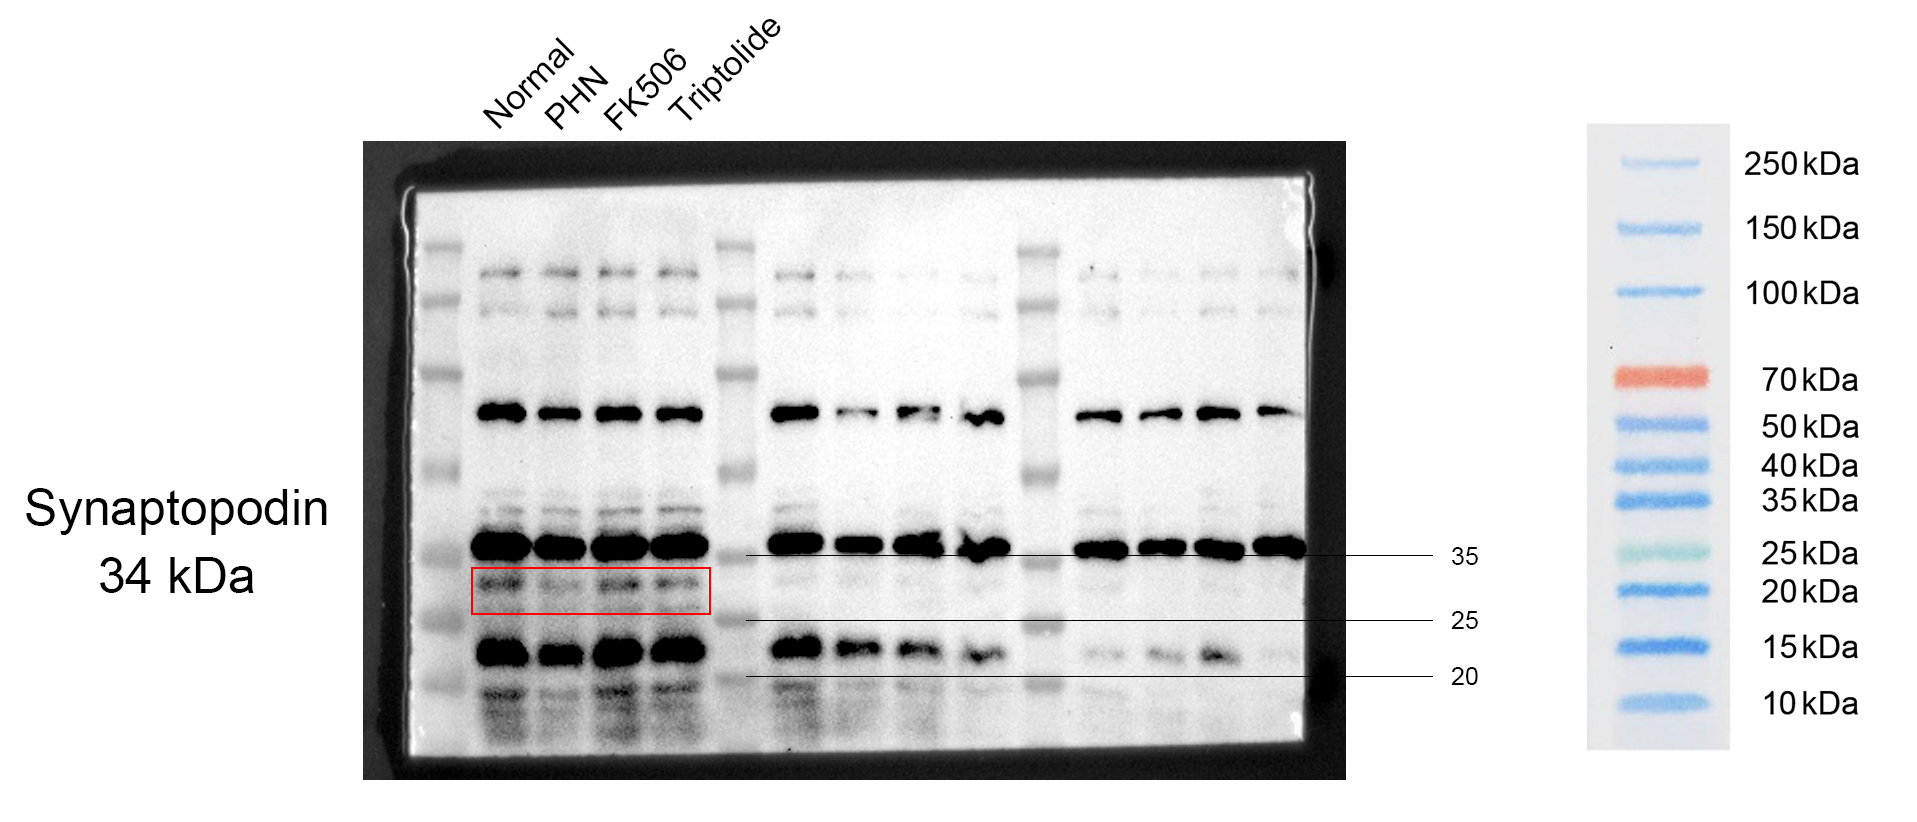


**Figure S2.** Synaptopodin marker.

| **No** | Targets | **No** | Targets | **No** | Targets | **No** | Targets |
| --- | --- | --- | --- | --- | --- | --- | --- |
| 1 | PTGS2 | 110 | CYP1A2 | 219 | KIF11 | 328 | ACACB |
| 2 | RAC1 | 111 | FGFR1 | 220 | LSS | 329 | DPP9 |
| 3 | HSPA4 | 112 | FLT1 | 221 | LTA4H | 330 | SCN3A |
| 4 | IL2 | 113 | ITGA4 | 222 | MAN1B1 | 331 | S1PR2 |
| 5 | ACE | 114 | PLA2G4A | 223 | MAOB | 332 | MARK4 |
| 6 | AKT1 | 115 | PLAU | 224 | MAPK12 | 333 | GLRA1 |
| 7 | AKT2 | 116 | PTK2 | 225 | MAPKAPK2 | 334 | HDAC11 |
| 8 | ALB | 117 | SLC22A12 | 226 | MDM2 | 335 | EGLN1 |
| 9 | APRT | 118 | SLC5A2 | 227 | METAP2 | 336 | MAP2K2 |
| 10 | BCL2L1 | 119 | MCL1 | 228 | MMP12 | 337 | ROCK2 |
| 11 | BTK | 120 | RAC3 | 229 | MMP13 | 338 | PSMB1 |
| 12 | CASP1 | 121 | SENP1 | 230 | MMP7 | 339 | CACNA1H |
| 13 | CASP3 | 122 | NR3C1 | 231 | NDST1 | 340 | STK3 |
| 14 | CCL5 | 123 | SP1 | 232 | NME2 | 341 | TDO2 |
| 15 | CDC42 | 124 | XIAP | 233 | NQO1 | 342 | DPP7 |
| 16 | CFB | 125 | ABO | 234 | NR1H2 | 343 | BLM |
| 17 | CTSB | 126 | ACAT1 | 235 | NR1H3 | 344 | PIK3CB |
| 18 | CYP2C9 | 127 | ACPP | 236 | NR1H4 | 345 | PTPN2 |
| 19 | DPP4 | 128 | ADH5 | 237 | NR1I2 | 346 | P2RY12 |
| 20 | EGFR | 129 | ADK | 238 | NR3C2 | 347 | FPRL2 |
| 21 | ERBB4 | 130 | AGXT | 239 | OAT | 348 | NOTUM |
| 22 | ESR1 | 131 | AHCY | 240 | OTC | 349 | SLC40A1 |
| 23 | F10 | 132 | AK1 | 241 | PADI4 | 350 | PDE3B |
| 24 | F2 | 133 | AKR1C2 | 242 | PAH | 351 | CYSLTR2 |
| 25 | FGFR2 | 134 | AKR1C3 | 243 | PCK1 | 352 | PDE11A |
| 26 | FOLH1 | 135 | ALDH2 | 244 | PCTP | 353 | CASP6 |
| 27 | GP1BA | 136 | ALDOA | 245 | PDPK1 | 354 | SCN9A |
| 28 | GSTM1 | 137 | AMD1 | 246 | PITPNA | 355 | EZH2 |
| 29 | HMGCR | 138 | AMY2A | 247 | PLA2G10 | 356 | GHSR |
| 30 | HPRT1 | 139 | ANG | 248 | PNMT | 357 | RXFP1 |
| 31 | HRAS | 140 | APAF1 | 249 | PNP | 358 | IDO1 |
| 32 | HSP90AA1 | 141 | AR | 250 | PPARA | 359 | PKN2 |
| 33 | HSPA8 | 142 | ARG1 | 251 | PPARD | 360 | APLNR |
| 34 | IGF1R | 143 | ARG2 | 252 | PPP1CC | 361 | KDM5A |
| 35 | INSR | 144 | ARL5A | 253 | PRKACA | 362 | WDR5 |
| 36 | JAK2 | 145 | ARL5B | 254 | PRKCQ | 363 | HSD11B2 |
| 37 | KDR | 146 | B3GAT1 | 255 | PROCR | 364 | BCL6 |
| 38 | LCN2 | 147 | BACE1 | 256 | PTPN1 | 365 | AAK1 |
| 39 | LYZ | 148 | BCAT2 | 257 | PYGL | 366 | AURKB |
| 40 | MAP2K1 | 149 | BCHE | 258 | RAB5A | 367 | DUT |
| 41 | MAPK1 | 150 | BHMT | 259 | RAN | 368 | CHUK |
| 42 | MAPK10 | 151 | BIRC7 | 260 | RAP2A | 369 | SCN2A |
| 43 | MAPK14 | 152 | C1S | 261 | RARA | 370 | ABCC1 |
| 44 | MAPK8 | 153 | CA1 | 262 | RARB | 371 | ADRA1D |
| 45 | MET | 154 | CA2 | 263 | RARG | 372 | ADRA2A |
| 46 | MIF | 155 | CBR1 | 264 | RFK | 373 | ADRA2B |
| 47 | MME | 156 | CBS | 265 | RNASE2 | 374 | ADRA2C |
| 48 | MMP16 | 157 | CCNA2 | 266 | RORA | 375 | ADRB3 |
| 49 | MMP2 | 158 | CDA | 267 | RXRA | 376 | AKR1B10 |
| 50 | MMP3 | 159 | CDK5R1 | 268 | RXRB | 377 | ALK |
| 51 | MMP8 | 160 | CES1 | 269 | SEC14L2 | 378 | ALPL |
| 52 | MMP9 | 161 | CFD | 270 | SETD7 | 379 | ATM |
| 53 | NOS2 | 162 | CHEK1 | 271 | SHBG | 380 | AVPR1A |
| 54 | NOS3 | 163 | CHIT1 | 272 | SHMT1 | 381 | BRD4 |
| 55 | PGR | 164 | CLK1 | 273 | SORD | 382 | BRD9 |
| 56 | PIK3R1 | 165 | CRABP2 | 274 | SPR | 383 | BRPF1 |
| 57 | PLA2G2A | 166 | CTNNA1 | 275 | SRM | 384 | CALCRL |
| 58 | PPARG | 167 | CTSD | 276 | SULT1A1 | 385 | CARM1 |
| 59 | PPIA | 168 | CTSG | 277 | SULT2A1 | 386 | CCR3 |
| 60 | RAB11A | 169 | CTSK | 278 | TGM3 | 387 | CCR4 |
| 61 | RAF1 | 170 | CTSS | 279 | THRB | 388 | CCR9 |
| 62 | RBP4 | 171 | CYP2C8 | 280 | TPH1 | 389 | CDC7 |
| 63 | REN | 172 | DAPK1 | 281 | TPSB2 | 390 | CHRM2 |
| 64 | RHOA | 173 | DCK | 282 | TRAPPC3 | 391 | CHRM3 |
| 65 | SELE | 174 | DCXR | 283 | TTPA | 392 | CHRM5 |
| 66 | SOD2 | 175 | DHFR | 284 | TYMS | 393 | CREBBP |
| 67 | SRC | 176 | DPEP1 | 285 | UAP1 | 394 | CYP26A1 |
| 68 | STAT1 | 177 | DTYMK | 286 | UCK2 | 395 | CYP2A6 |
| 69 | SYK | 178 | EEA1 | 287 | APEX1 | 396 | CYSLTR1 |
| 70 | TAP1 | 179 | EIF4E | 288 | GPR55 | 397 | EED |
| 71 | TEK | 180 | EPHB4 | 289 | TRIM24 | 398 | F9 |
| 72 | TGFBR1 | 181 | ESR2 | 290 | KDM1A | 399 | FFAR1 |
| 73 | TTR | 182 | ESRRA | 291 | CLK4 | 400 | FFAR2 |
| 74 | VDR | 183 | ESRRG | 292 | TOP2A | 401 | GRM2 |
| 75 | WAS | 184 | F11 | 293 | CACNA1B | 402 | GRM4 |
| 76 | ZAP70 | 185 | F7 | 294 | CSNK2B | 403 | HDAC1 |
| 77 | PTGS1 | 186 | FABP3 | 295 | CNR2 | 404 | HDAC3 |
| 78 | NFKB1 | 187 | FABP4 | 296 | HSP90AB1 | 405 | HDAC6 |
| 79 | HIF1A | 188 | FABP6 | 297 | ADORA1 | 406 | HRH1 |
| 80 | PRKCA | 189 | FABP7 | 298 | HDAC2 | 407 | HRH2 |
| 81 | PRKCD | 190 | FECH | 299 | C5AR1 | 408 | HSD17B2 |
| 82 | STAT3 | 191 | FGG | 300 | PRCP | 409 | IDH1 |
| 83 | CDK5 | 192 | FKBP1A | 301 | DUSP3 | 410 | IMPDH1 |
| 84 | CNR1 | 193 | FNTA | 302 | NTRK3 | 411 | IMPDH2 |
| 85 | ADAM10 | 194 | GALE | 303 | FPR1 | 412 | KDM5C |
| 86 | CYP3A4 | 195 | GC | 304 | RORB | 413 | KLKB1 |
| 87 | CCR1 | 196 | GLO1 | 305 | TDP1 | 414 | KMO |
| 88 | STING1 | 197 | GMPR | 306 | SCD | 415 | LCK |
| 89 | SERPINE1 | 198 | GMPR2 | 307 | ACACA | 416 | LGMN |
| 90 | CFTR | 199 | GPI | 308 | CCNE1 | 417 | MAP2 |
| 91 | GRIN1 | 200 | GSK3B | 309 | GSK3A | 418 | MAP3K14 |
| 92 | TLR4 | 201 | GSR | 310 | TFPI | 419 | MC3R |
| 93 | MTOR | 202 | GSTA1 | 311 | KLF5 | 420 | MC5R |
| 94 | SPHK1 | 203 | GSTA3 | 312 | PSMB9 | 421 | MGLL |
| 95 | PIK3CG | 204 | GSTM2 | 313 | FPR2 | 422 | NAMPT |
| 96 | PDGFRB | 205 | GSTP1 | 314 | DCUN1D1 | 423 | NOX4 |
| 97 | CASP8 | 206 | GSTT2 | 315 | PROC | 424 | NPY1R |
| 98 | AOC3 | 207 | GSTZ1 | 316 | MC4R | 425 | NPY2R |
| 99 | ROCK1 | 208 | HADH | 317 | HDAC10 | 426 | PIN1 |
| 100 | ITGB1 | 209 | HCK | 318 | MAOA | 427 | PLK1 |
| 101 | ITGB3 | 210 | HDAC8 | 319 | PIK3CD | 428 | PLK4 |
| 102 | ADRB1 | 211 | HINT1 | 320 | S1PR5 | 429 | PREP |
| 103 | SLC9A1 | 212 | HNF4G | 321 | PDGFRA | 430 | PTGES |
| 104 | ACHE | 213 | HNMT | 322 | TMPRSS6 | 431 | ROS1 |
| 105 | ADRB2 | 214 | HSD11B1 | 323 | NTSR2 | 432 | SPHK2 |
| 106 | BCL2 | 215 | HSD17B1 | 324 | RPS6KA1 | 433 | TBXAS1 |
| 107 | BRAF | 216 | ITK | 325 | CAMKK2 | 434 | TLR7 |
| 108 | CCR2 | 217 | IVD | 326 | PRMT5 | 435 | TMIGD3 |
| 109 | CCR5 | 218 | JAK3 | 327 | THRA |  |  |

**Table S1.** Potential ingredients-related targets of Triptolide.

| **No** | **Target** | **No** | **Target** | **No** | **Target** | **No** | **Target** | **No** | **Target** | **No** | **Target** |
| --- | --- | --- | --- | --- | --- | --- | --- | --- | --- | --- | --- |
| 1 | MARCH1 | 226 | C24orf100 | 452 | CBAS5 | 678 | STAT1 | 904 | HYOU1 | 1130 | CD80 |
| 2 | MARCH2 | 227 | C3orf1 | 453 | C9orf155 | 679 | KL | 905 | CFHR2 | 1131 | MFN1 |
| 3 | MARCH3 | 228 | C6orf1 | 454 | SJS1 | 680 | DPP4 | 906 | GBA | 1132 | SMAD4 |
| 4 | MARCH4 | 229 | C6orf70 | 455 | SEP | 681 | PIK3CA | 907 | SLC3A2 | 1133 | RYR1 |
| 5 | MARCH5 | 230 | CAP23 | 456 | SAO | 682 | STX1A | 908 | MET | 1134 | SHC1 |
| 6 | MARCH6 | 231 | CD10 | 457 | RDGCA | 683 | PDPN | 909 | ARL6 | 1135 | BBS7 |
| 7 | MARCH7 | 232 | CD20 | 458 | RCD2 | 684 | BMP6 | 910 | CFP | 1136 | FGF23 |
| 8 | MARCH8 | 233 | CD46 | 459 | OLMSX | 685 | SYK | 911 | KDR | 1137 | ALOX5AP |
| 9 | MARCH9 | 234 | CFFM4 | 460 | NEDDFAS | 686 | PAX6 | 912 | KLRK1 | 1138 | CLDN3 |
| 10 | MARCH10 | 235 | CFHL5 | 461 | MAHCJ | 687 | ABCA12 | 913 | HFE-AS1 | 1139 | ARL13B |
| 11 | MARCH11 | 236 | CSD2 | 462 | FAME3 | 688 | IL18 | 914 | IL17A | 1140 | CYP2C9 |
| 12 | ABCD3 | 237 | CX50 | 463 | EBS7 | 689 | TIMP3 | 915 | LAMA2 | 1141 | POSTN |
| 13 | ABCD4 | 238 | CYPB5M | 464 | CRSDS | 690 | MIR192 | 916 | JAG1 | 1142 | CLDN1 |
| 14 | AMER1 | 239 | DAL1 | 465 | CORD7 | 691 | HGF | 917 | CERT1 | 1143 | ITPR1 |
| 15 | ANPEP | 240 | DDP2 | 466 | CMT2T | 692 | SGK1 | 918 | PRNP | 1144 | GZMB |
| 16 | APMAP | 241 | DLG2 | 467 | CBP1 | 693 | CSF1 | 919 | CD81 | 1145 | C12orf29 |
| 17 | ATP2B1 | 242 | DLG3 | 468 | CAE1 | 694 | SOD1 | 920 | ATP6AP2 | 1146 | CCL3 |
| 18 | ATP2B2 | 243 | DLG6 | 469 | BSVD | 695 | RAB11A | 921 | SAA1 | 1147 | TMPO |
| 19 | ATP2B4 | 244 | DMT | 470 | BIGH3 | 696 | FGFR3 | 922 | LRP1 | 1148 | PDGFD |
| 20 | ATP5MC3 | 245 | E25A | 471 | SCA43 | 697 | RHOA | 923 | FLT1 | 1149 | BCL2L11 |
| 21 | ATP5MD | 246 | EHM2 | 472 | RATOR | 698 | IL2RA | 924 | VDR | 1150 | HAVCR2 |
| 22 | ATP5MF | 247 | EMRE | 473 | OI19 | 699 | TJP1 | 925 | ABCB4 | 1151 | SLC9A3R2 |
| 23 | ATP5MPL | 248 | EPB41L4 | 474 | OI10 | 700 | ORAI1 | 926 | C1QTNF5 | 1152 | CD68 |
| 24 | ATP5PB | 249 | EPB72 | 475 | CHC | 701 | ABCB6 | 927 | PNPLA8 | 1153 | SLC5A2 |
| 25 | BAMBI | 250 | FAM123B | 476 | CDG2 | 702 | PKD2 | 928 | NEUROD1 | 1154 | TNFRSF25 |
| 26 | BASP1 | 251 | FCER1B | 477 | CACD1 | 703 | TIMP1 | 929 | CR1 | 1155 | PF4 |
| 27 | BET1 | 252 | FOLH | 478 | PADMAL | 704 | ERBB2 | 930 | GFPT1 | 1156 | CNR1 |
| 28 | C2orf88 | 253 | GOAT | 479 | EBMD | 705 | TIMP2 | 931 | SCARB1 | 1157 | PAPPA |
| 29 | CD151 | 254 | GOLPH2 | 480 | CSNB1I | 706 | COL1A2 | 932 | IGF2 | 1158 | MT-ATP8 |
| 30 | CD48 | 255 | GOLPH4 | 481 | COL4A3 | 707 | ITGAM | 933 | INPP5E | 1159 | CCR2 |
| 31 | CFHR5 | 256 | GRMP | 482 | COL4A4 | 708 | IL2 | 934 | PROM1 | 1160 | MAPK10 |
| 32 | CLMP | 257 | GUC2D | 483 | ACE | 709 | ITGB2 | 935 | CHRNA1 | 1161 | CLDN4 |
| 33 | COL4A1 | 258 | HMP | 484 | UMOD | 710 | STIM1 | 936 | SELENOS | 1162 | SPHK1 |
| 34 | CYB5B | 259 | HTM4 | 485 | COL4A5 | 711 | LYZ | 937 | TAP1 | 1163 | IL15 |
| 35 | DCLAMP | 260 | IDD | 486 | REN | 712 | LRPAP1 | 938 | MBP | 1164 | STX18 |
| 36 | DGCR2 | 261 | IGAN3 | 487 | ALB | 713 | HNF1A | 939 | BID | 1165 | GRB2 |
| 37 | DMAC2L | 262 | IMD85 | 488 | HNF1B | 714 | FOXP3 | 940 | HSPA5 | 1166 | CTSB |
| 38 | DNAJC19 | 263 | IMP1 | 489 | TNF | 715 | CAT | 941 | CDKN2A | 1167 | MYO1E |
| 39 | DNCM | 264 | IMP2 | 490 | MFF-DT | 716 | CALR | 942 | HLA-DPB1 | 1168 | C4B |
| 40 | EMC1 | 265 | JAW1 | 491 | IL6 | 717 | IL6ST | 943 | BECN1 | 1169 | SLC17A5 |
| 41 | EMC10 | 266 | KABAMAS | 492 | WT1 | 718 | AMBP | 944 | IAPP | 1170 | IRS1 |
| 42 | EMC2 | 267 | KIAA0057 | 493 | MUC1 | 719 | CC2D2A | 945 | NPHP3-ACAD11 | 1171 | SNX9 |
| 43 | EMC4 | 268 | KIAA0090 | 494 | B2M | 720 | PLCE1 | 946 | GOLGA2 | 1172 | DNASE1 |
| 44 | EMC8 | 269 | KIAA0103 | 495 | CD79A | 721 | BCL2L1 | 947 | GSN | 1173 | FOS |
| 45 | EMP1 | 270 | KIAA0751 | 496 | NLRP3 | 722 | ZMPSTE24 | 948 | NFKB1 | 1174 | HSPD1 |
| 46 | EMP2 | 271 | KIAA1548 | 497 | TGFB1 | 723 | CD63 | 949 | CFHR3 | 1175 | PRKAR1A |
| 47 | EMP3 | 272 | KIAA1634 | 498 | CFH | 724 | LAMA5 | 950 | THBD | 1176 | SHH |
| 48 | EPB41L1 | 273 | KIAA1971 | 499 | LMX1B | 725 | SLC9A1 | 951 | LGALS3 | 1177 | GRIA1 |
| 49 | EPB41L2 | 274 | LAMP | 500 | NPHS1 | 726 | PLA2G2A | 952 | NUP107 | 1178 | AOC3 |
| 50 | EPB41L3 | 275 | LPCAT4 | 501 | KAT6B | 727 | BLK | 953 | BBS2 | 1179 | PTK2 |
| 51 | EPB41L4A | 276 | MAS20 | 502 | NPHS2 | 728 | IL1A | 954 | CASR | 1180 | F8 |
| 52 | EPB41L4B | 277 | MCOP5 | 503 | VEGFA | 729 | MMP3 | 955 | KNG1 | 1181 | SLC7A1 |
| 53 | EPB41L5 | 278 | MGA3 | 504 | MMP1 | 730 | SLC7A5 | 956 | FYN | 1182 | YWHAE |
| 54 | EPB49 | 279 | MITRAC7 | 505 | MAFB | 731 | FGFR2 | 957 | HLA-E | 1183 | MEP1B |
| 55 | ERMAP | 280 | MRD11 | 506 | DUSP29 | 732 | SPTB | 958 | PIGR | 1184 | CRB1 |
| 56 | ERMARD | 281 | MS4A4 | 507 | AGT | 733 | AGTR2 | 959 | RAB7A | 1185 | IL5 |
| 57 | FAM123A | 282 | MS4A6 | 508 | AGTR1 | 734 | SERPINE1 | 960 | CR2 | 1186 | UBD |
| 58 | FOLH1 | 283 | MTDPS6 | 509 | INS | 735 | ITGA2B | 961 | NRP1 | 1187 | BDKRB1 |
| 59 | GJA8 | 284 | MYT1 | 510 | LAMP2 | 736 | BSG | 962 | ATP1A1 | 1188 | PTX3 |
| 60 | GOLIM4 | 285 | NEPII | 511 | PLA2R1 | 737 | KCNN4 | 963 | RBP4 | 1189 | AKT2 |
| 61 | GOLM1 | 286 | NID67 | 512 | APOA1 | 738 | HNF4A | 964 | CD47 | 1190 | PTPN11 |
| 62 | GP2 | 287 | NIM3 | 513 | COL8A2 | 739 | ABCA4 | 965 | CDK5 | 1191 | SLC34A1 |
| 63 | GUCY2D | 288 | NIR1 | 514 | SLC2A1 | 740 | ADIPOQ | 966 | CD40 | 1192 | BDKRB2 |
| 64 | HNFJ3 | 289 | NIR2 | 515 | SEC61A1 | 741 | SLC2A9 | 967 | IGF1R | 1193 | RHOD |
| 65 | HNP1 | 290 | NIR3 | 516 | MIR21 | 742 | ITGA2 | 968 | CYP1A1 | 1194 | TERT |
| 66 | HSPG2 | 291 | NMA | 517 | HLA-DRB1 | 743 | TF | 969 | MAPK8 | 1195 | OSM |
| 67 | IGAN1 | 292 | NOC4 | 518 | NPHP1 | 744 | NEU1 | 970 | CX3CR1 | 1196 | ADD2 |
| 68 | IGAN2 | 293 | NPHPL2 | 519 | IL10 | 745 | CCR6 | 971 | XYLT2 | 1197 | MKS1 |
| 69 | IMMP1L | 294 | NPHS10 | 520 | TP53 | 746 | SLC2A4 | 972 | SMAD3 | 1198 | TCTN2 |
| 70 | IMMP2L | 295 | NSMASE2 | 521 | COL4A2 | 747 | MTOR | 973 | CD38 | 1199 | CD86 |
| 71 | IMMT | 296 | NSMASE3 | 522 | AKT1 | 748 | CXCR4 | 974 | SMARCAL1 | 1200 | XBP1 |
| 72 | ITM2A | 297 | PALS1 | 523 | CEP290 | 749 | APOB | 975 | ARL3 | 1201 | IFNGR1 |
| 73 | ITM2B | 298 | PEPN | 524 | HLA-A | 750 | LAMB1 | 976 | CLCN5 | 1202 | PLAU |
| 74 | ITM2C | 299 | PETA3 | 525 | CD2AP | 751 | ADAM10 | 977 | CEP83 | 1203 | CYP11B2 |
| 75 | JKAMP | 300 | PGL1 | 526 | TLR4 | 752 | CD44 | 978 | GNAS | 1204 | SORT1 |
| 76 | LAMP1 | 301 | PGL3 | 527 | MYH9 | 753 | CCL5 | 979 | SLC16A1 | 1205 | COL18A1 |
| 77 | LAMP5 | 302 | PLC | 528 | CFTR | 754 | PRKCB | 980 | CYP1A2 | 1206 | OCRL |
| 78 | LAPTM5 | 303 | PMCA1 | 529 | HLA-DQA1 | 755 | NRAS | 981 | SLC4A4 | 1207 | DEFA1 |
| 79 | LRMP | 304 | PMCA2 | 530 | IL1B | 756 | DYSF | 982 | ARHGDIA | 1208 | IL13 |
| 80 | LSAMP | 305 | PMP24 | 531 | TNFRSF1A | 757 | SLC9A3R1 | 983 | AP2A2 | 1209 | CASP1 |
| 81 | MAGI1 | 306 | PMP34 | 532 | APOE | 758 | ENG | 984 | NPHP3-AS1 | 1210 | TCTN3 |
| 82 | MAGI2 | 307 | PRIMA | 533 | C3 | 759 | FCGR2A | 985 | SLC22A8 | 1211 | TNFRSF11A |
| 83 | MAGI3 | 308 | PROPIN1 | 534 | SOD2 | 760 | GP1BB | 986 | COX5A | 1212 | GRIN1 |
| 84 | MAJIN | 309 | PXMP1 | 535 | LRP2 | 761 | BRAF | 987 | PRKD1 | 1213 | SCNN1B |
| 85 | MBNP | 310 | PXMP1L | 536 | HAVCR1 | 762 | TNFSF11 | 988 | CASP9 | 1214 | BBS1 |
| 86 | MBOAT1 | 311 | RIM1 | 537 | SCARB2 | 763 | PLA2G4A | 989 | MLKL | 1215 | HTR2A |
| 87 | MBOAT2 | 312 | RNF174 | 538 | CAV1 | 764 | AHI1 | 990 | CEL | 1216 | KCNJ10 |
| 88 | MBOAT4 | 313 | ROSP1 | 539 | NOS3 | 765 | ARF6 | 991 | CD209 | 1217 | MYO1C |
| 89 | MBOAT7 | 314 | S1P | 540 | IL1RN | 766 | CYBA | 992 | C1GALT1C1 | 1218 | KCNE5 |
| 90 | MBTPS1 | 315 | S2P | 541 | TMEM67 | 767 | TNFRSF1B | 993 | GP6 | 1219 | CXCL12 |
| 91 | MBTPS2 | 316 | SC | 542 | CCL2 | 768 | PDGFB | 994 | MT-CO3 | 1220 | SLC7A9 |
| 92 | MCEMP1 | 317 | SCAMP37 | 543 | ICAM1 | 769 | HLA-G | 995 | GLA | 1221 | KRIT1 |
| 93 | MCP | 318 | SERPINH2 | 544 | HLA-B | 770 | TMEM231 | 996 | XYLT1 | 1222 | MIR146A |
| 94 | MFRP | 319 | SIAL3 | 545 | HFE | 771 | TGFBR2 | 997 | JUN | 1223 | NAGA |
| 95 | MME | 320 | SMAKAP | 546 | TRPC6 | 772 | COQ2 | 998 | SLC6A2 | 1224 | NCAM1 |
| 96 | MMEL1 | 321 | SYB1 | 547 | AKR1B1 | 773 | THBS1 | 999 | HPSE | 1225 | HLA-C |
| 97 | MMP14 | 322 | SYB2 | 548 | FN1 | 774 | GAPDH | 1000 | TMEM138 | 1226 | ITPR3 |
| 98 | MMP16 | 323 | TEB4 | 549 | ENPP1 | 775 | MIR377 | 1001 | HMCN1 | 1227 | PDE6D |
| 99 | MPP2 | 324 | TETM4 | 550 | COL7A1 | 776 | NELL1 | 1002 | PRKN | 1228 | VPS4B |
| 100 | MPP3 | 325 | TIM10A | 551 | TREX1 | 777 | CYP3A4 | 1003 | FGFR1 | 1229 | PAX4 |
| 101 | MPP4 | 326 | TIM14 | 552 | EGF | 778 | ADCY10 | 1004 | FBN1 | 1230 | ABCG5 |
| 102 | MPP5 | 327 | TIM17A | 553 | PECAM1 | 779 | ZAP70 | 1005 | MYD88 | 1231 | ADRB1 |
| 103 | MPP6 | 328 | TIM17B | 554 | MEFV | 780 | MKKS | 1006 | IFNA1 | 1232 | APOC3 |
| 104 | MPP7 | 329 | TIM21 | 555 | TLR2 | 781 | TRPV4 | 1007 | TCF4 | 1233 | MT-ND4 |
| 105 | MPV17 | 330 | TIM22 | 556 | MPO | 782 | UCP2 | 1008 | MYC | 1234 | L1CAM |
| 106 | MPV17L | 331 | TIM50 | 557 | ZEB1 | 783 | SLC22A2 | 1009 | DDR1 | 1235 | TSC2 |
| 107 | MPV17L2 | 332 | TIM9 | 558 | PODXL | 784 | ABCG2 | 1010 | TRPC1 | 1236 | CD69 |
| 108 | MS4A1 | 333 | TMEM194A | 559 | FAS | 785 | COL5A1 | 1011 | NOTCH2 | 1237 | CISD2 |
| 109 | MS4A10 | 334 | TMEM194B | 560 | EGFR | 786 | HMGCR | 1012 | MT-ND1 | 1238 | SLC2A3 |
| 110 | MS4A12 | 335 | TMEM49 | 561 | MMP2 | 787 | RET | 1013 | SMAD2 | 1239 | WAS |
| 111 | MS4A2 | 336 | TMEM85 | 562 | MMP8 | 788 | CDC42 | 1014 | TGFB2 | 1240 | CDH5 |
| 112 | MS4A3 | 337 | TMP | 563 | BAX | 789 | INSR | 1015 | PTPRO | 1241 | NFE2L2 |
| 113 | MS4A4A | 338 | TOM22 | 564 | CD4 | 790 | SLC26A4 | 1016 | ELMO1 | 1242 | PTCH1 |
| 114 | MS4A4E | 339 | TOM34 | 565 | MBL2 | 791 | ABCB11 | 1017 | COL8A1 | 1243 | SLC26A6 |
| 115 | MS4A5 | 340 | TOM40 | 566 | MMP9 | 792 | RHO | 1018 | LYN | 1244 | CYP2D6 |
| 116 | MS4A6A | 341 | TOM5 | 567 | COL4A6 | 793 | PTPN22 | 1019 | OXT | 1245 | TCF7L2 |
| 117 | MS4A6E | 342 | TOM6 | 568 | GP1BA | 794 | PIK3R1 | 1020 | C1GALT1 | 1246 | MAP1LC3A |
| 118 | MS4A7 | 343 | UNCL | 569 | CTNNB1 | 795 | F2 | 1021 | HBEGF | 1247 | SLC11A2 |
| 119 | MS4A8B | 344 | USMG5 | 570 | NPHP3 | 796 | MT-ATP6 | 1022 | MSR1 | 1248 | ABCG1 |
| 120 | NEDE | 345 | VAM1 | 571 | TINAG | 797 | ACHE | 1023 | TEK | 1249 | PLAT |
| 121 | NEMP1 | 346 | VEL | 572 | APP | 798 | MIF | 1024 | PLCG1 | 1250 | LEP |
| 122 | NEMP2 | 347 | WNCHRS | 573 | VTN | 799 | IL1R1 | 1025 | GLIS2 | 1251 | NCF2 |
| 123 | NEU3 | 348 | YIF1 | 574 | CD40LG | 800 | SLC7A8 | 1026 | RPE65 | 1252 | ACP1 |
| 124 | OPA3 | 349 | WWP3 | 575 | CXCL8 | 801 | SLC22A12 | 1027 | STAT4 | 1253 | TRPV1 |
| 125 | PGRMC2 | 350 | WTX | 576 | BCL2 | 802 | IFT140 | 1028 | SDC1 | 1254 | MT-ND5 |
| 126 | PITPNM1 | 351 | TIM10 | 577 | CD59 | 803 | CASP8 | 1029 | MT-TL1 | 1255 | ITGA4 |
| 127 | PITPNM2 | 352 | SPAX1 | 578 | SLC2A2 | 804 | CYBB | 1030 | COMT | 1256 | SLC6A19 |
| 128 | PITPNM3 | 353 | SJS | 579 | CCR5 | 805 | MMP24 | 1031 | ATP8B1 | 1257 | PGR |
| 129 | PKMYT1 | 354 | SFA1 | 580 | MTHFR | 806 | UCP1 | 1032 | LDHA | 1258 | CDH23 |
| 130 | PRIMA1 | 355 | SEDKF | 581 | APOL1 | 807 | COL5A2 | 1033 | PTPN3 | 1259 | TRAF3IP1 |
| 131 | PXMP2 | 356 | RP7 | 582 | VDAC1 | 808 | GP9 | 1034 | SLC12A1 | 1260 | NOS1 |
| 132 | PXMP4 | 357 | RIM2 | 583 | SPP1 | 809 | PRKCA | 1035 | ROBO2 | 1261 | GSTM1 |
| 133 | RFH1 | 358 | RIM | 584 | AGER | 810 | RAB8A | 1036 | TNFSF13B | 1262 | SERPINC1 |
| 134 | RIMS1 | 359 | RDGBA | 585 | JAK1 | 811 | SLC12A3 | 1037 | DRD2 | 1263 | HMGB1 |
| 135 | RIMS2 | 360 | RD | 586 | RAC1 | 812 | NOTCH1 | 1038 | NTRK1 | 1264 | IL7 |
| 136 | RIMS3 | 361 | PVNH6 | 587 | NID1 | 813 | INVS | 1039 | AQP3 | 1265 | GRK2 |
| 137 | RIMS4 | 362 | PSM | 588 | ABCA3 | 814 | VWF | 1040 | KCNJ1 | 1266 | KCNE1 |
| 138 | ROM1 | 363 | PPROM | 589 | THSD7A | 815 | TNFSF10 | 1041 | ERBB4 | 1267 | PSAP |
| 139 | SCAMP1 | 364 | PMP70 | 590 | PON1 | 816 | LAMC1 | 1042 | PARP1 | 1268 | CRYAA |
| 140 | SCAMP2 | 365 | PMCA4 | 591 | FASLG | 817 | ANXA5 | 1043 | CLTRN | 1269 | CXCL10 |
| 141 | SCAMP3 | 366 | PIG17 | 592 | GJB2 | 818 | SERPINB7 | 1044 | SLC26A3 | 1270 | OSGEP |
| 142 | SCAMP4 | 367 | PEREC1 | 593 | PTEN | 819 | GGT1 | 1045 | SPTAN1 | 1271 | CALCA |
| 143 | SCAMP5 | 368 | PALS2 | 594 | JAK2 | 820 | SCGB1A1 | 1046 | NPPB | 1272 | IGFBP1 |
| 144 | SCIMP | 369 | P79R | 595 | CYP1B1 | 821 | TNFRSF11B | 1047 | LOC105371046 | 1273 | F2RL1 |
| 145 | SDHC | 370 | NPHPL1 | 596 | ATRIP | 822 | SLC22A11 | 1048 | ALOX5 | 1274 | NTRK2 |
| 146 | SDHD | 371 | NNO2 | 597 | ABCB1 | 823 | MFN2 | 1049 | CD8A | 1275 | NGF |
| 147 | SELP | 372 | NEP2 | 598 | FGA | 824 | APPL1 | 1050 | MAP2K1 | 1276 | EFEMP1 |
| 148 | SERPINH1 | 373 | NEDHAHM | 599 | SRC | 825 | APOA2 | 1051 | KCNK5 | 1277 | BLZF1 |
| 149 | SLC25A17 | 374 | NBL4 | 600 | CRP | 826 | TTC21B-AS1 | 1052 | PICK1 | 1278 | NCF1 |
| 150 | SLC41A1 | 375 | NAP22 | 601 | HLA-DQB1 | 827 | PKHD1 | 1053 | CUBN | 1279 | CTNS-AS1 |
| 151 | SLC4A1 | 376 | MP68 | 602 | ITGB1 | 828 | ADD1 | 1054 | CFB | 1280 | COX4I1 |
| 152 | SLC4A2 | 377 | MGCA9 | 603 | EPO | 829 | DNM1L | 1055 | HSP90AA1 | 1281 | ARRB2 |
| 153 | SMDT1 | 378 | MC2DN3 | 604 | TSC1 | 830 | SMPD1 | 1056 | ATL1 | 1282 | TLR3 |
| 154 | SMIM1 | 379 | MC1DN31 | 605 | CASP3 | 831 | STAT3 | 1057 | ALAD | 1283 | CDKN1A |
| 155 | SMIM20 | 380 | LENG4 | 606 | LMNA | 832 | CX3CL1 | 1058 | CSF2 | 1284 | BGLAP |
| 156 | SMIM29 | 381 | LCA1 | 607 | TGM1 | 833 | CLCNKB | 1059 | CETP | 1285 | IGHE |
| 157 | SMIM3 | 382 | LBH | 608 | PRKCD | 834 | PLAUR | 1060 | OTOF | 1286 | MERTK |
| 158 | SMPD3 | 383 | KIAA1457 | 609 | MSN | 835 | NOS2 | 1061 | ITGAL | 1287 | SMPD2 |
| 159 | SMPD4 | 384 | KIAA1418 | 610 | HRAS | 836 | PIK3CG | 1062 | CLDN14 | 1288 | FCGR3A |
| 160 | SPRY2 | 385 | KIAA1399 | 611 | CDH1 | 837 | FIS1 | 1063 | TNFRSF10B | 1289 | HLA-DMA |
| 161 | STOM | 386 | KIAA0705 | 612 | CTNS | 838 | ABCC2 | 1064 | SSBP1 | 1290 | LTA |
| 162 | TGFBI | 387 | KIAA0137 | 613 | KCNQ1 | 839 | STING1 | 1065 | SCNN1G | 1291 | ROCK1 |
| 163 | TIMM10 | 388 | KIAA0016 | 614 | CD36 | 840 | LPL | 1066 | PDX1 | 1292 | HSPA1A |
| 164 | TIMM13 | 389 | JAMP | 615 | NPHP4 | 841 | DMD | 1067 | BTK | 1293 | MUC16 |
| 165 | TIMM17A | 390 | IFAP | 616 | ACTN4 | 842 | RAF1 | 1068 | SLC26A5 | 1294 | EDNRA |
| 166 | TIMM17B | 391 | HSS1 | 617 | ATRIP-TREX1 | 843 | F3 | 1069 | ACSL4 | 1295 | ITGAV |
| 167 | TIMM21 | 392 | HANAC | 618 | NPPA | 844 | SREBF1 | 1070 | IQCB1 | 1296 | FERMT2 |
| 168 | TIMM22 | 393 | GPP130 | 619 | LOC107548112 | 845 | AP2B1 | 1071 | COL3A1 | 1297 | MCAM |
| 169 | TIMM23 | 394 | GP73 | 620 | CST3 | 846 | SERPINF1 | 1072 | PRKCSH | 1298 | PPIG |
| 170 | TIMM29 | 395 | GMH1 | 621 | SLC7A7 | 847 | IFT172 | 1073 | TLR9 | 1299 | MMACHC |
| 171 | TIMM44 | 396 | FHR5 | 622 | CTLA4 | 848 | HP | 1074 | PTGS1 | 1300 | PXN |
| 172 | TIMM50 | 397 | FB | 623 | INF2 | 849 | ADRB2 | 1075 | ERVW-1 | 1301 | RP2 |
| 173 | TIMM8B | 398 | EPG3 | 624 | EZR | 850 | IGF1 | 1076 | LTF | 1302 | GJB6 |
| 174 | TIMM9 | 399 | EPB3L1 | 625 | ABCC8 | 851 | TMEM237 | 1077 | P2RX7 | 1303 | ADAMTSL1 |
| 175 | TIMMDC1 | 400 | EPB3 | 626 | IFNG | 852 | CCR1 | 1078 | TLR1 | 1304 | RAB3IP |
| 176 | TOM1 | 401 | DYTSPG | 627 | KRAS | 853 | TGFBR1 | 1079 | CD19 | 1305 | IL3 |
| 177 | TOM1L1 | 402 | DOA10 | 628 | PKD1 | 854 | ELANE | 1080 | KITLG | 1306 | SHROOM3 |
| 178 | TOM1L2 | 403 | DFNA82 | 629 | APRT | 855 | ADAM17 | 1081 | CD28 | 1307 | CAMLG |
| 179 | TOMM20 | 404 | DAPIT | 630 | F5 | 856 | VIM | 1082 | HSPA4 | 1308 | PPIA |
| 180 | TOMM22 | 405 | CVID5 | 631 | CLU | 857 | SPARC | 1083 | VPS33B | 1309 | PPP3R2 |
| 181 | TOMM34 | 406 | CTRCT1 | 632 | ITGB3 | 858 | SDHB | 1084 | TRAF6 | 1310 | CYP3A5 |
| 182 | TOMM40 | 407 | COXPD43 | 633 | VCAM1 | 859 | GPER1 | 1085 | ADM | 1311 | SLC10A2 |
| 183 | TOMM5 | 408 | CORD5 | 634 | KCNJ11 | 860 | RECK | 1086 | HLA-DPA1 | 1312 | SLC10A1 |
| 184 | TOMM6 | 409 | CMT2EE | 635 | PPARG | 861 | SLC30A9 | 1087 | FCGR3B | 1313 | ABCC10 |
| 185 | TOMM7 | 410 | CDGG1 | 636 | LOC107982234 | 862 | ANXA1 | 1088 | BMP2 | 1314 | SLCO1B1 |
| 186 | TOMM70 | 411 | CD20L2 | 637 | IL6R | 863 | SLC22A6 | 1089 | EBF3 | 1315 | CYP2C19 |
| 187 | TRAM | 412 | CD20L | 638 | TFRC | 864 | PTPRC | 1090 | M6PR | 1316 | PPIF |
| 188 | TRAM1L1 | 413 | CD13 | 639 | PRTN3 | 865 | MT-CO1 | 1091 | XDH | 1317 | SLCO1B3 |
| 189 | TRAM2 | 414 | CAVIPMR | 640 | PTGS2 | 866 | PLG | 1092 | DCN | 1318 | GAA |
| 190 | UNC50 | 415 | CALLA | 641 | ITGA3 | 867 | SLC5A1 | 1093 | IRAK1 | 1319 | PLB1 |
| 191 | VAMP1 | 416 | C4orf52 | 642 | AQP1 | 868 | KCNMA1 | 1094 | GATA3 | 1320 | YWHAZ |
| 192 | VAMP2 | 417 | C22orf32 | 643 | LAMB2 | 869 | PDCD1 | 1095 | SCNN1A | 1321 | RBM45 |
| 193 | VAMP24 | 418 | BSCV | 644 | ABCA1 | 870 | SEC61G | 1096 | PDGFRB | 1322 | PPP3R1 |
| 194 | VAMP3 | 419 | BND7 | 645 | CFHR1 | 871 | CNDP1 | 1097 | HSPA8 | 1323 | PLA2G6 |
| 195 | VAMP5 | 420 | BLAST1 | 646 | GJA1 | 872 | TMEM216 | 1098 | F10 | 1324 | SMN2 |
| 196 | VAMP8 | 421 | ATP5J2 | 647 | CYCS | 873 | SYNPO | 1099 | TPO | 1325 | SMN1 |
| 197 | VMP1 | 422 | AHUS2 | 648 | HMOX1 | 874 | SEC63 | 1100 | SLC22A1 | 1326 | SNRPN |
| 198 | WHAMM | 423 | ACAM | 649 | NAGLU | 875 | CP | 1101 | SPTBN1 | 1327 | SNURF |
| 199 | XPNPEP3 | 424 | ABRI | 650 | AGRN | 876 | TAP2 | 1102 | NF1 | 1328 | PLA2G12B |
| 200 | YIF1A | 425 | TNRC19 | 651 | ITGB4 | 877 | SYT1 | 1103 | ZFYVE9 | 1329 | RAPGEF5 |
| 201 | YIF1B | 426 | SPH4 | 652 | ITGA6 | 878 | DGKE | 1104 | UCP3 | 1330 | FOSL1 |
| 202 | AE1 | 427 | SJA | 653 | SFTPC | 879 | FCAR | 1105 | IGF2R | 1331 | RABEP2 |
| 203 | AE2 | 428 | PSMA | 654 | NOD2 | 880 | WFS1 | 1106 | RPGRIP1L | 1332 | VTCN1 |
| 204 | AIP1 | 429 | PMP69 | 655 | CD55 | 881 | AQP5 | 1107 | CHPT1 | 1333 | VIP |
| 205 | AMER2 | 430 | OSCS | 656 | TTC21B | 882 | ZNF423 | 1108 | EXOC7 | 1334 | GDF15 |
| 206 | AORF | 431 | OBOE | 657 | PLA2G1B | 883 | MT-CO2 | 1109 | IL2RB | 1335 | MUC3A |
| 207 | APP3 | 432 | NPHS15 | 658 | NOTCH3 | 884 | CD14 | 1110 | SLC9A3 | 1336 | HLA-DQA2 |
| 208 | ASAM | 433 | NL1 | 659 | LCN2 | 885 | HTRA1 | 1111 | MAPK3 | 1337 | HPGDS |
| 209 | ATP5F1 | 434 | NEP | 660 | COL1A1 | 886 | LRP5 | 1112 | PIK3C2A | 1338 | PRAP1 |
| 210 | ATP5G3 | 435 | NEDMABA | 661 | LBR | 887 | ANXA2 | 1113 | BSND | 1339 | OGA |
| 211 | ATP5JL | 436 | MRT57 | 662 | CCN2 | 888 | ATP2A2 | 1114 | ANGPT2 | 1340 | HLA-DRB3 |
| 212 | ATP5S | 437 | MER2 | 663 | C4A | 889 | TNXB | 1115 | MAPT | 1341 | HLA-DRB5 |
| 213 | BADLAMP | 438 | MC5DN6 | 664 | FGF2 | 890 | FCGR2B | 1116 | CADM1 | 1342 | MC1R |
| 214 | BAIAP1 | 439 | KIAA0597 | 665 | IL4 | 891 | FLNA | 1117 | PAFAH1B1 | 1343 | MIR193A |
| 215 | BB1 | 440 | KIAA0340 | 666 | TTR | 892 | GCK | 1118 | OPTN | 1344 | STMN1 |
| 216 | BCM1 | 441 | KFSDX | 667 | ESR1 | 893 | MIA3 | 1119 | SDC2 | 1345 | IGHG3 |
| 217 | BRI | 442 | ICH | 668 | HPRT1 | 894 | RMND1 | 1120 | XK | 1346 | IGHA1 |
| 218 | BRI3 | 443 | HSM1 | 669 | SELL | 895 | FABP1 | 1121 | MT-ND6 | 1347 | NAT2 |
| 219 | BSVD1 | 444 | FBD | 670 | SNCA | 896 | MIP | 1122 | ATP6V1B1 |  |  |
| 220 | C11orf85 | 445 | CZP1 | 671 | EDN1 | 897 | DAG1 | 1123 | ATP1A2 |  |  |
| 221 | C14orf2 | 446 | CSD | 672 | AQP2 | 898 | HIF1A | 1124 | CLDN10 |  |  |
| 222 | C17orf87 | 447 | CSBS | 673 | SELE | 899 | SLC3A1 | 1125 | PLEK |  |  |
| 223 | C19orf52 | 448 | CORD6 | 674 | ACE2 | 900 | MAPK14 | 1126 | THY1 |  |  |
| 224 | C19orf63 | 449 | CMS25 | 675 | WDR19 | 901 | PAX2 | 1127 | VCL |  |  |
| 225 | C20orf3 | 450 | CFHR5D | 676 | LAMP3 | 902 | CCND1 | 1128 | ATG5 |  |  |

**Table S2.** The membranous nephropathy-related targets from four databases.

| **GO** | **Description** | **LogP** | **Enrichment** | **Z-score** | **#GeneInGO** | **#GeneInGOAndHitList** | **%InGO** |
| --- | --- | --- | --- | --- | --- | --- | --- |
| hsa05200 | Pathways in cancer | -45.7825 | 21.20578 | 29.42186 | 531 | 44 | 37.28814 |
| hsa05205 | Proteoglycans in cancer | -45.4922 | 42.44448 | 37.29217 | 205 | 34 | 28.81356 |
| hsa04151 | PI3K-Akt signaling pathway | -38.6431 | 25.30236 | 28.80749 | 354 | 35 | 29.66102 |
| hsa04014 | Ras signaling pathway | -34.8537 | 31.98941 | 29.67747 | 232 | 29 | 24.57627 |
| hsa04015 | Rap1 signaling pathway | -34.4441 | 34.12203 | 30.16733 | 210 | 28 | 23.72881 |
| hsa04510 | Focal adhesion | -33.2801 | 34.37668 | 29.73625 | 201 | 27 | 22.88136 |
| hsa01521 | EGFR tyrosine kinase inhibitor resistance | -32.5943 | 68.02811 | 37.36235 | 79 | 21 | 17.79661 |
| hsa05163 | Human cytomegalovirus infection | -31.8997 | 30.70983 | 28.01627 | 225 | 27 | 22.88136 |
| hsa04010 | MAPK signaling pathway | -31.7751 | 25.24334 | 26.16288 | 294 | 29 | 24.57627 |
| hsa05167 | Kaposi sarcoma-associated herpesvirus infection | -30.3035 | 32.97877 | 27.98704 | 194 | 25 | 21.18644 |
| hsa04370 | VEGF signaling pathway | -29.1815 | 78.07584 | 37.11623 | 59 | 18 | 15.25424 |
| hsa05161 | Hepatitis B | -28.8677 | 36.33365 | 28.24288 | 162 | 23 | 19.49153 |
| hsa05215 | Prostate cancer | -28.5691 | 52.76603 | 31.98337 | 97 | 20 | 16.94915 |
| hsa01522 | Endocrine resistance | -28.4713 | 52.2276 | 31.81397 | 98 | 20 | 16.94915 |
| hsa05207 | Chemical carcinogenesis - receptor activation | -27.6746 | 28.97154 | 25.59817 | 212 | 24 | 20.33898 |
| hsa04066 | HIF-1 signaling pathway | -27.4647 | 46.95693 | 30.1054 | 109 | 20 | 16.94915 |
| hsa05212 | Pancreatic cancer | -26.9181 | 60.61151 | 32.5896 | 76 | 18 | 15.25424 |
| hsa05170 | Human immunodeficiency virus 1 infection | -26.0724 | 27.76439 | 24.49345 | 212 | 23 | 19.49153 |
| hsa04625 | C-type lectin receptor signaling pathway | -26.0539 | 46.75375 | 29.27436 | 104 | 19 | 16.10169 |
| hsa04926 | Relaxin signaling pathway | -24.155 | 37.69294 | 26.15784 | 129 | 19 | 16.10169 |
| hsa05208 | Chemical carcinogenesis - reactive oxygen species | -24.0018 | 25.24724 | 22.76246 | 223 | 22 | 18.64407 |
| hsa05210 | Colorectal cancer | -23.9563 | 50.5879 | 28.84291 | 86 | 17 | 14.40678 |
| hsa05235 | PD-L1 expression and PD-1 checkpoint pathway in cancer | -23.6808 | 48.88269 | 28.3341 | 89 | 17 | 14.40678 |
| hsa04917 | Prolactin signaling pathway | -23.6705 | 58.49492 | 30.16319 | 70 | 16 | 13.55932 |
| hsa04071 | Sphingolipid signaling pathway | -23.1093 | 38.70987 | 25.81552 | 119 | 18 | 15.25424 |
| hsa05231 | Choline metabolism in cancer | -22.9127 | 44.39346 | 26.94872 | 98 | 17 | 14.40678 |
| hsa05152 | Tuberculosis | -22.8728 | 28.43503 | 23.1225 | 180 | 20 | 16.94915 |
| hsa04810 | Regulation of actin cytoskeleton | -22.6854 | 24.65239 | 21.95186 | 218 | 21 | 17.79661 |
| hsa04012 | ErbB signaling pathway | -22.1898 | 48.17228 | 27.27742 | 85 | 16 | 13.55932 |
| hsa04664 | Fc epsilon RI signaling pathway | -21.95 | 56.45189 | 28.67182 | 68 | 15 | 12.71186 |
| hsa04915 | Estrogen signaling pathway | -21.8926 | 33.38025 | 23.87862 | 138 | 18 | 15.25424 |
| hsa04722 | Neurotrophin signaling pathway | -21.3895 | 36.55932 | 24.34329 | 119 | 17 | 14.40678 |
| hsa04072 | Phospholipase D signaling pathway | -21.3239 | 31.12483 | 23.01003 | 148 | 18 | 15.25424 |
| hsa04068 | FoxO signaling pathway | -20.6468 | 33.21038 | 23.14037 | 131 | 17 | 14.40678 |
| hsa05132 | Salmonella infection | -20.012 | 20.55544 | 19.40708 | 249 | 20 | 16.94915 |
| hsa05230 | Central carbon metabolism in cancer | -19.8528 | 51.18305 | 26.32721 | 70 | 14 | 11.86441 |
| hsa04935 | Growth hormone synthesis, secretion and action | -19.703 | 34.40877 | 22.87106 | 119 | 16 | 13.55932 |
| hsa05206 | MicroRNAs in cancer | -19.4668 | 17.33619 | 18.10787 | 310 | 21 | 17.79661 |
| hsa04660 | T cell receptor signaling pathway | -18.9686 | 36.91085 | 22.97664 | 104 | 15 | 12.71186 |
| hsa04140 | Autophagy - animal | -18.4804 | 29.04003 | 20.90255 | 141 | 16 | 13.55932 |
| hsa04024 | cAMP signaling pathway | -18.1308 | 20.84378 | 18.5443 | 221 | 18 | 15.25424 |
| hsa04912 | GnRH signaling pathway | -17.9999 | 38.52488 | 22.69998 | 93 | 14 | 11.86441 |
| hsa04919 | Thyroid hormone signaling pathway | -17.9385 | 31.72503 | 21.21054 | 121 | 15 | 12.71186 |
| hsa05218 | Melanoma | -17.8342 | 46.20692 | 24.05384 | 72 | 13 | 11.01695 |
| hsa04613 | Neutrophil extracellular trap formation | -17.8321 | 22.89768 | 18.96446 | 190 | 17 | 14.40678 |
| hsa04666 | Fc gamma R-mediated phagocytosis | -17.7301 | 36.93622 | 22.20301 | 97 | 14 | 11.86441 |
| hsa05214 | Glioma | -17.5866 | 44.35864 | 23.5473 | 75 | 13 | 11.01695 |
| hsa05165 | Human papillomavirus infection | -17.5644 | 15.46316 | 16.57163 | 331 | 20 | 16.94915 |
| hsa05010 | Alzheimer disease | -17.5549 | 13.99537 | 16.05196 | 384 | 21 | 17.79661 |
| hsa05225 | Hepatocellular carcinoma | -17.2367 | 24.37288 | 19.02713 | 168 | 16 | 13.55932 |
| hsa04210 | Apoptosis | -17.1531 | 28.22595 | 19.93093 | 136 | 15 | 12.71186 |
| hsa05211 | Renal cell carcinoma | -16.2826 | 44.507 | 22.6608 | 69 | 12 | 10.16949 |
| hsa05223 | Non-small cell lung cancer | -16.0456 | 42.65254 | 22.16262 | 72 | 12 | 10.16949 |
| hsa04914 | Progesterone-mediated oocyte maturation | -15.7561 | 32.61665 | 20.03298 | 102 | 13 | 11.01695 |
| hsa04371 | Apelin signaling pathway | -15.4678 | 25.77564 | 18.33703 | 139 | 14 | 11.86441 |
| hsa05224 | Breast cancer | -15.1222 | 24.37288 | 17.79203 | 147 | 14 | 11.86441 |
| hsa05226 | Gastric cancer | -15.039 | 24.04573 | 17.66252 | 149 | 14 | 11.86441 |
| hsa05160 | Hepatitis C | -14.7179 | 22.82047 | 17.16883 | 157 | 14 | 11.86441 |
| hsa05221 | Acute myeloid leukemia | -14.6672 | 42.01594 | 21.05073 | 67 | 11 | 9.322034 |
| hsa05022 | Pathways of neurodegeneration - multiple diseases | -14.5271 | 10.75274 | 13.43307 | 476 | 20 | 16.94915 |
| hsa04630 | JAK-STAT signaling pathway | -14.526 | 22.11613 | 16.87854 | 162 | 14 | 11.86441 |
| hsa05220 | Chronic myeloid leukemia | -14.0309 | 37.04037 | 19.70326 | 76 | 11 | 9.322034 |
| hsa04550 | Signaling pathways regulating pluripotency of stem cells | -13.8038 | 23.26502 | 16.7154 | 143 | 13 | 11.01695 |
| hsa04662 | B cell receptor signaling pathway | -13.6511 | 34.3301 | 18.92905 | 82 | 11 | 9.322034 |
| hsa04150 | mTOR signaling pathway | -13.3099 | 21.32627 | 15.94188 | 156 | 13 | 11.01695 |
| hsa04910 | Insulin signaling pathway | -12.5788 | 22.41593 | 15.73547 | 137 | 12 | 10.16949 |
| hsa04725 | Cholinergic synapse | -12.0767 | 24.9121 | 15.9502 | 113 | 11 | 9.322034 |
| hsa04218 | Cellular senescence | -11.9019 | 19.68579 | 14.65525 | 156 | 12 | 10.16949 |
| hsa05213 | Endometrial cancer | -11.8501 | 39.71099 | 18.4825 | 58 | 9 | 7.627119 |
| hsa04022 | cGMP-PKG signaling pathway | -11.5496 | 18.38912 | 14.11351 | 167 | 12 | 10.16949 |
| hsa05166 | Human T-cell leukemia virus 1 infection | -10.0994 | 13.83326 | 12.02017 | 222 | 12 | 10.16949 |
| hsa04929 | GnRH secretion | -9.80252 | 31.98941 | 15.54386 | 64 | 8 | 6.779661 |
| hsa04261 | Adrenergic signaling in cardiomyocytes | -9.38065 | 17.06102 | 12.35079 | 150 | 10 | 8.474576 |
| hsa05417 | Lipid and atherosclerosis | -44.7388 | 40.47032 | 36.37779 | 215 | 34 | 28.81356 |
| hsa04933 | AGE-RAGE signaling pathway in diabetic complications | -34.0848 | 58.86051 | 36.29923 | 100 | 23 | 19.49153 |
| hsa05135 | Yersinia infection | -28.8512 | 41.09588 | 29.46065 | 137 | 22 | 18.64407 |
| hsa05145 | Toxoplasmosis | -27.2099 | 45.69915 | 29.68316 | 112 | 20 | 16.94915 |
| hsa05131 | Shigellosis | -26.0416 | 24.86626 | 23.58909 | 247 | 24 | 20.33898 |
| hsa05418 | Fluid shear stress and atherosclerosis | -25.2102 | 36.82234 | 26.51295 | 139 | 20 | 16.94915 |
| hsa05142 | Chagas disease | -20.8313 | 40.14357 | 24.80219 | 102 | 16 | 13.55932 |
| hsa04668 | TNF signaling pathway | -20.1447 | 36.55932 | 23.61371 | 112 | 16 | 13.55932 |
| hsa04380 | Osteoclast differentiation | -19.1752 | 31.98941 | 22.00572 | 128 | 16 | 13.55932 |
| hsa05415 | Diabetic cardiomyopathy | -18.7984 | 22.69199 | 19.42258 | 203 | 18 | 15.25424 |
| hsa04620 | Toll-like receptor signaling pathway | -17.2861 | 34.45013 | 21.4022 | 104 | 14 | 11.86441 |
| hsa05162 | Measles | -17.0074 | 27.61675 | 19.69968 | 139 | 15 | 12.71186 |
| hsa05120 | Epithelial cell signaling in Helicobacter pylori infection | -16.2023 | 43.87119 | 22.49124 | 70 | 12 | 10.16949 |
| hsa05130 | Pathogenic Escherichia coli infection | -16.122 | 20.785 | 17.44959 | 197 | 16 | 13.55932 |
| hsa05169 | Epstein-Barr virus infection | -15.9479 | 20.27052 | 17.2116 | 202 | 16 | 13.55932 |
| hsa04657 | IL-17 signaling pathway | -14.5841 | 32.67003 | 19.26124 | 94 | 12 | 10.16949 |
| hsa05133 | Pertussis | -14.0309 | 37.04037 | 19.70326 | 76 | 11 | 9.322034 |
| hsa04932 | Non-alcoholic fatty liver disease | -13.3463 | 21.46386 | 15.998 | 155 | 13 | 11.01695 |
| hsa04931 | Insulin resistance | -12.2963 | 26.06544 | 16.34407 | 108 | 11 | 9.322034 |
| hsa04920 | Adipocytokine signaling pathway | -9.5333 | 29.67133 | 14.93358 | 69 | 8 | 6.779661 |
| hsa04936 | Alcoholic liver disease | -8.29764 | 16.21998 | 11.38614 | 142 | 9 | 7.627119 |
| hsa05020 | Prion disease | -7.95962 | 10.3116 | 9.679941 | 273 | 11 | 9.322034 |
| hsa05017 | Spinocerebellar ataxia | -7.00911 | 14.31694 | 9.997652 | 143 | 8 | 6.779661 |
| hsa04622 | RIG-I-like receptor signaling pathway | -6.4752 | 21.93559 | 10.98331 | 70 | 6 | 5.084746 |
| hsa04728 | Dopaminergic synapse | -4.86223 | 11.63251 | 7.667768 | 132 | 6 | 5.084746 |
| hsa04062 | Chemokine signaling pathway | -30.421 | 33.3223 | 28.14056 | 192 | 25 | 21.18644 |
| hsa05203 | Viral carcinogenesis | -11.8093 | 16.30833 | 13.74072 | 204 | 13 | 11.01695 |
| hsa04611 | Platelet activation | -22.7694 | 37.14899 | 25.26361 | 124 | 18 | 15.25424 |
| hsa05171 | Coronavirus disease - COVID-19 | -19.1757 | 20.95858 | 19.11363 | 232 | 19 | 16.10169 |
| hsa04659 | Th17 cell differentiation | -17.0468 | 33.1742 | 20.97937 | 108 | 14 | 11.86441 |
| hsa05140 | Leishmaniasis | -12.3052 | 33.23575 | 17.73913 | 77 | 10 | 8.474576 |
| hsa04658 | Th1 and Th2 cell differentiation | -9.98656 | 25.03519 | 14.46102 | 92 | 9 | 7.627119 |
| hsa05321 | Inflammatory bowel disease | -5.24189 | 19.68579 | 9.44563 | 65 | 5 | 4.237288 |
| hsa04621 | NOD-like receptor signaling pathway | -18.0715 | 23.64434 | 19.29704 | 184 | 17 | 14.40678 |
| hsa04217 | Necroptosis | -11.8032 | 19.31436 | 14.50212 | 159 | 12 | 10.16949 |
| hsa04141 | Protein processing in endoplasmic reticulum | -3.24143 | 7.482902 | 5.324705 | 171 | 5 | 4.237288 |
| hsa05164 | Influenza A | -17.1121 | 23.94529 | 18.84602 | 171 | 16 | 13.55932 |
| hsa05222 | Small cell lung cancer | -13.0811 | 30.59856 | 17.80828 | 92 | 11 | 9.322034 |
| hsa05168 | Herpes simplex virus 1 infection | -10.9852 | 8.789009 | 10.94381 | 495 | 17 | 14.40678 |
| hsa01524 | Platinum drug resistance | -10.9115 | 31.5512 | 16.36855 | 73 | 9 | 7.627119 |
| hsa04520 | Adherens junction | -16.1233 | 43.25328 | 22.32522 | 71 | 12 | 10.16949 |
| hsa04144 | Endocytosis | -8.33774 | 11.21541 | 10.17888 | 251 | 11 | 9.322034 |
| hsa04360 | Axon guidance | -13.818 | 19.68579 | 15.83634 | 182 | 14 | 11.86441 |
| hsa04670 | Leukocyte transendothelial migration | -13.5491 | 26.93845 | 17.37851 | 114 | 12 | 10.16949 |
| hsa04530 | Tight junction | -10.1592 | 16.65721 | 12.78413 | 169 | 11 | 9.322034 |
| hsa05100 | Bacterial invasion of epithelial cells | -9.14376 | 26.5886 | 14.08125 | 77 | 8 | 6.779661 |
| hsa04310 | Wnt signaling pathway | -3.28808 | 7.662133 | 5.407178 | 167 | 5 | 4.237288 |
| hsa04020 | Calcium signaling pathway | -13.4443 | 15.9947 | 14.60734 | 240 | 15 | 12.71186 |
| hsa04921 | Oxytocin signaling pathway | -13.3829 | 21.60324 | 16.05465 | 154 | 13 | 11.01695 |
| hsa05219 | Bladder cancer | -13.3089 | 56.17652 | 22.14298 | 41 | 9 | 7.627119 |
| hsa04928 | Parathyroid hormone synthesis, secretion and action | -12.3873 | 26.55724 | 16.50918 | 106 | 11 | 9.322034 |
| hsa04726 | Serotonergic synapse | -11.9918 | 24.47885 | 15.79971 | 115 | 11 | 9.322034 |
| hsa04650 | Natural killer cell mediated cytotoxicity | -11.3652 | 21.48907 | 14.71963 | 131 | 11 | 9.322034 |
| hsa04540 | Gap junction | -10.1629 | 26.17315 | 14.81179 | 88 | 9 | 7.627119 |
| hsa04730 | Long-term depression | -10.0349 | 34.12203 | 16.08494 | 60 | 8 | 6.779661 |
| hsa04270 | Vascular smooth muscle contraction | -9.86416 | 19.09815 | 13.15065 | 134 | 10 | 8.474576 |
| hsa04720 | Long-term potentiation | -8.07968 | 26.73741 | 13.20929 | 67 | 7 | 5.932203 |
| hsa05216 | Thyroid cancer | -6.4816 | 34.58314 | 12.80216 | 37 | 5 | 4.237288 |
| hsa04916 | Melanogenesis | -4.30869 | 12.66907 | 7.357316 | 101 | 5 | 4.237288 |
| hsa05034 | Alcoholism | -4.01534 | 8.211185 | 6.195426 | 187 | 6 | 5.084746 |
| hsa04934 | Cushing syndrome | -2.48726 | 6.604265 | 4.381238 | 155 | 4 | 3.389831 |
| hsa04211 | Longevity regulating pathway | -11.6561 | 28.75452 | 16.42346 | 89 | 10 | 8.474576 |
| hsa04213 | Longevity regulating pathway - multiple species | -11.5758 | 37.14899 | 17.84568 | 62 | 9 | 7.627119 |
| hsa04923 | Regulation of lipolysis in adipocytes | -10.2848 | 36.55932 | 16.6819 | 56 | 8 | 6.779661 |
| hsa04152 | AMPK signaling pathway | -8.94563 | 19.19364 | 12.50748 | 120 | 9 | 7.627119 |
| hsa04973 | Carbohydrate digestion and absorption | -3.07991 | 16.33502 | 6.58971 | 47 | 3 | 2.542373 |
| hsa04064 | NF-kappa B signaling pathway | -9.50348 | 22.14651 | 13.53005 | 104 | 9 | 7.627119 |
| hsa05340 | Primary immunodeficiency | -3.35259 | 20.20384 | 7.419047 | 38 | 3 | 2.542373 |
| hsa04930 | Type II diabetes mellitus | -9.26112 | 38.94363 | 16.13035 | 46 | 7 | 5.932203 |
| hsa04750 | Inflammatory mediator regulation of TRP channels | -8.29949 | 20.89104 | 12.35297 | 98 | 8 | 6.779661 |
| hsa04723 | Retrograde endocannabinoid signaling | -5.70525 | 12.1041 | 8.481564 | 148 | 7 | 5.932203 |
| hsa04960 | Aldosterone-regulated sodium reabsorption | -4.87805 | 27.66651 | 10.16549 | 37 | 4 | 3.389831 |
| hsa04724 | Glutamatergic synapse | -2.974 | 8.979483 | 5.346177 | 114 | 4 | 3.389831 |
| hsa04713 | Circadian entrainment | -2.18261 | 7.914905 | 4.272338 | 97 | 3 | 2.542373 |
| hsa04215 | Apoptosis - multiple species | -8.58317 | 47.98411 | 16.65525 | 32 | 6 | 5.084746 |
| hsa05014 | Amyotrophic lateral sclerosis | -5.75443 | 7.030639 | 7.250071 | 364 | 10 | 8.474576 |
| hsa04115 | p53 signaling pathway | -4.99299 | 17.52844 | 8.855515 | 73 | 5 | 4.237288 |
| hsa05016 | Huntington disease | -4.54849 | 6.690595 | 6.266498 | 306 | 8 | 6.779661 |
| hsa05416 | Viral myocarditis | -2.77157 | 12.79576 | 5.728335 | 60 | 3 | 2.542373 |
| hsa05202 | Transcriptional misregulation in cancer | -8.31668 | 13.25986 | 10.70166 | 193 | 10 | 8.474576 |
| hsa00591 | Linoleic acid metabolism | -7.0355 | 44.12332 | 14.55173 | 29 | 5 | 4.237288 |
| hsa05204 | Chemical carcinogenesis - DNA adducts | -5.11356 | 18.54458 | 9.13817 | 69 | 5 | 4.237288 |
| hsa00982 | Drug metabolism - cytochrome P450 | -3.73131 | 14.21751 | 7.032816 | 72 | 4 | 3.389831 |
| hsa00980 | Metabolism of xenobiotics by cytochrome P450 | -3.59721 | 13.12386 | 6.714979 | 78 | 4 | 3.389831 |
| hsa00830 | Retinol metabolism | -2.61571 | 11.29038 | 5.320718 | 68 | 3 | 2.542373 |
| hsa00983 | Drug metabolism - other enzymes | -2.41575 | 9.596822 | 4.822296 | 80 | 3 | 2.542373 |
| hsa05134 | Legionellosis | -7.01515 | 26.93845 | 12.27684 | 57 | 6 | 5.084746 |
| hsa05146 | Amoebiasis | -6.80152 | 17.56281 | 10.49455 | 102 | 7 | 5.932203 |
| hsa04972 | Pancreatic secretion | -6.80152 | 17.56281 | 10.49455 | 102 | 7 | 5.932203 |
| hsa04970 | Salivary secretion | -4.50356 | 13.90844 | 7.766495 | 92 | 5 | 4.237288 |
| hsa04976 | Bile secretion | -3.37812 | 11.50181 | 6.214339 | 89 | 4 | 3.389831 |
| hsa04971 | Gastric acid secretion | -2.47855 | 10.10192 | 4.976016 | 76 | 3 | 2.542373 |
| hsa04137 | Mitophagy - animal | -6.40183 | 21.32627 | 10.81527 | 72 | 6 | 5.084746 |
| hsa00590 | Arachidonic acid metabolism | -5.379 | 20.97666 | 9.781868 | 61 | 5 | 4.237288 |
| hsa04913 | Ovarian steroidogenesis | -4.31844 | 20.07178 | 8.53765 | 51 | 4 | 3.389831 |
| hsa00564 | Glycerophospholipid metabolism | -2.17033 | 7.83414 | 4.244218 | 98 | 3 | 2.542373 |
| hsa04924 | Renin secretion | -5.11356 | 18.54458 | 9.13817 | 69 | 5 | 4.237288 |
| hsa04614 | Renin-angiotensin system | -4.01195 | 33.38025 | 9.729812 | 23 | 3 | 2.542373 |
| hsa04612 | Antigen processing and presentation | -4.85192 | 16.40482 | 8.532191 | 78 | 5 | 4.237288 |
| hsa04610 | Complement and coagulation cascades | -4.66998 | 15.05384 | 8.126647 | 85 | 5 | 4.237288 |
| hsa05323 | Rheumatoid arthritis | -4.48091 | 13.75888 | 7.71825 | 93 | 5 | 4.237288 |
| hsa04061 | Viral protein interaction with cytokine and cytokine receptor | -4.32939 | 12.79576 | 7.400161 | 100 | 5 | 4.237288 |
| hsa04060 | Cytokine-cytokine receptor interaction | -2.96235 | 5.205056 | 4.54579 | 295 | 6 | 5.084746 |
| hsa04961 | Endocrine and other factor-regulated calcium reabsorption | -4.25221 | 19.31436 | 8.35807 | 53 | 4 | 3.389831 |
| hsa04623 | Cytosolic DNA-sensing pathway | -3.95689 | 16.24859 | 7.588366 | 63 | 4 | 3.389831 |
| hsa04114 | Oocyte meiosis | -3.77423 | 9.767758 | 6.298877 | 131 | 5 | 4.237288 |
| hsa04714 | Thermogenesis | -3.50829 | 6.618498 | 5.380639 | 232 | 6 | 5.084746 |
| hsa04145 | Phagosome | -3.47492 | 8.418265 | 5.742682 | 152 | 5 | 4.237288 |
| hsa04512 | ECM-receptor interaction | -3.39679 | 11.63251 | 6.256131 | 88 | 4 | 3.389831 |
| hsa05410 | Hypertrophic cardiomyopathy | -3.35967 | 11.37401 | 6.173209 | 90 | 4 | 3.389831 |
| hsa05414 | Dilated cardiomyopathy | -3.25351 | 10.66314 | 5.939365 | 96 | 4 | 3.389831 |
| hsa04640 | Hematopoietic cell lineage | -3.20312 | 10.34001 | 5.830058 | 99 | 4 | 3.389831 |
| hsa05412 | Arrhythmogenic right ventricular cardiomyopathy | -2.46252 | 9.970724 | 4.936534 | 77 | 3 | 2.542373 |
| hsa04350 | TGF-beta signaling pathway | -3.28808 | 10.89001 | 6.014958 | 94 | 4 | 3.389831 |
| hsa05030 | Cocaine addiction | -3.02691 | 15.66828 | 6.43613 | 49 | 3 | 2.542373 |
| hsa05144 | Malaria | -3.00127 | 15.35492 | 6.362684 | 50 | 3 | 2.542373 |
| hsa04918 | Thyroid hormone synthesis | -2.49481 | 10.23661 | 5.016238 | 75 | 3 | 2.542373 |

**Table S3.** KEGG pathway enrichment analysis.

| GO | Description | LogP | Enrichment | Z-score | #GeneInGO | #GeneInGOAndHitList | %InGO |
| --- | --- | --- | --- | --- | --- | --- | --- |
| GO:0030335 | positive regulation of cell migration | -44.7548 | 20.10763 | 28.58646 | 560 | 44 | 37.28814 |
| GO:2000147 | positive regulation of cell motility | -43.9466 | 19.28129 | 27.94143 | 584 | 44 | 37.28814 |
| GO:0051272 | positive regulation of cellular component movement | -43.5236 | 18.86143 | 27.60795 | 597 | 44 | 37.28814 |
| GO:0040017 | positive regulation of locomotion | -43.4594 | 18.79845 | 27.55758 | 599 | 44 | 37.28814 |
| GO:0051897 | positive regulation of protein kinase B signaling | -14.8583 | 27.95713 | 18.45438 | 119 | 13 | 11.01695 |
| GO:0051896 | regulation of protein kinase B signaling | -13.6541 | 19.15943 | 15.60152 | 187 | 14 | 11.86441 |
| GO:0001934 | positive regulation of protein phosphorylation | -35.2771 | 14.15995 | 22.71712 | 741 | 41 | 34.74576 |
| GO:0006468 | protein phosphorylation | -33.4556 | 14.17712 | 22.15767 | 704 | 39 | 33.05085 |
| GO:0033674 | positive regulation of kinase activity | -32.2436 | 17.7937 | 23.44989 | 489 | 34 | 28.81356 |
| GO:0051347 | positive regulation of transferase activity | -31.234 | 15.57745 | 22.10472 | 575 | 35 | 29.66102 |
| GO:0043549 | regulation of kinase activity | -30.5145 | 12.49972 | 20.35352 | 778 | 38 | 32.20339 |
| GO:0043408 | regulation of MAPK cascade | -29.8561 | 13.39091 | 20.59193 | 688 | 36 | 30.50847 |
| GO:0043410 | positive regulation of MAPK cascade | -27.9731 | 16.12474 | 21.18519 | 492 | 31 | 26.27119 |
| GO:0007169 | transmembrane receptor protein tyrosine kinase signaling pathway | -27.7057 | 18.3248 | 21.9848 | 405 | 29 | 24.57627 |
| GO:0007167 | enzyme-linked receptor protein signaling pathway | -25.2277 | 13.09137 | 18.83254 | 606 | 31 | 26.27119 |
| GO:0018108 | peptidyl-tyrosine phosphorylation | -23.0829 | 33.30404 | 24.50646 | 146 | 19 | 16.10169 |
| GO:0018212 | peptidyl-tyrosine modification | -22.9079 | 32.63349 | 24.24428 | 149 | 19 | 16.10169 |
| GO:0045860 | positive regulation of protein kinase activity | -22.108 | 15.64274 | 18.67412 | 409 | 25 | 21.18644 |
| GO:0046777 | protein autophosphorylation | -20.9757 | 26.00208 | 21.48032 | 187 | 19 | 16.10169 |
| GO:0045859 | regulation of protein kinase activity | -20.5233 | 10.85701 | 16.03654 | 660 | 28 | 23.72881 |
| GO:0070848 | response to growth factor | -17.6068 | 11.81938 | 15.24835 | 498 | 23 | 19.49153 |
| GO:0014068 | positive regulation of phosphatidylinositol 3-kinase signaling | -17.2732 | 42.11264 | 22.91673 | 79 | 13 | 11.01695 |
| GO:0014066 | regulation of phosphatidylinositol 3-kinase signaling | -16.9308 | 32.57103 | 20.7765 | 110 | 14 | 11.86441 |
| GO:0071363 | cellular response to growth factor stimulus | -15.8199 | 11.48338 | 14.31564 | 468 | 21 | 17.79661 |
| GO:0070374 | positive regulation of ERK1 and ERK2 cascade | -15.3263 | 18.5278 | 16.37998 | 221 | 16 | 13.55932 |
| GO:0071900 | regulation of protein serine/threonine kinase activity | -15.0106 | 12.53193 | 14.31927 | 388 | 19 | 16.10169 |
| GO:0070372 | regulation of ERK1 and ERK2 cascade | -14.2113 | 13.9441 | 14.39459 | 312 | 17 | 14.40678 |
| GO:0071902 | positive regulation of protein serine/threonine kinase activity | -13.8856 | 17.13718 | 15.1832 | 224 | 15 | 12.71186 |
| GO:0043405 | regulation of MAP kinase activity | -13.7848 | 19.57822 | 15.78863 | 183 | 14 | 11.86441 |
| GO:0043406 | positive regulation of MAP kinase activity | -11.95 | 24.26783 | 15.7259 | 116 | 11 | 9.322034 |
| GO:0032103 | positive regulation of response to external stimulus | -30.4261 | 17.99844 | 22.88265 | 455 | 32 | 27.11864 |
| GO:0050727 | regulation of inflammatory response | -25.0602 | 17.27428 | 20.52212 | 400 | 27 | 22.88136 |
| GO:0031347 | regulation of defense response | -22.8615 | 11.59737 | 17.26773 | 662 | 30 | 25.42373 |
| GO:0001819 | positive regulation of cytokine production | -17.9392 | 12.23711 | 15.55997 | 481 | 23 | 19.49153 |
| GO:0031349 | positive regulation of defense response | -15.666 | 15.15288 | 15.53365 | 304 | 18 | 15.25424 |
| GO:0050729 | positive regulation of inflammatory response | -13.457 | 21.88749 | 16.16958 | 152 | 13 | 11.01695 |
| GO:0048608 | reproductive structure development | -27.1612 | 17.54502 | 21.46325 | 423 | 29 | 24.57627 |
| GO:0061458 | reproductive system development | -27.0729 | 17.42146 | 21.37945 | 426 | 29 | 24.57627 |
| GO:0035239 | tube morphogenesis | -24.0584 | 11.96587 | 17.88197 | 663 | 31 | 26.27119 |
| GO:0001525 | angiogenesis | -20.4479 | 17.43076 | 18.59469 | 323 | 22 | 18.64407 |
| GO:0001568 | blood vessel development | -19.8812 | 12.66907 | 16.563 | 505 | 25 | 21.18644 |
| GO:0001944 | vasculature development | -19.4556 | 12.16327 | 16.17689 | 526 | 25 | 21.18644 |
| GO:0007507 | heart development | -17.9792 | 11.35299 | 15.21895 | 541 | 24 | 20.33898 |
| GO:0048514 | blood vessel morphogenesis | -17.9718 | 13.37324 | 16.01283 | 421 | 22 | 18.64407 |
| GO:0001890 | placenta development | -15.1643 | 24.53982 | 17.85775 | 146 | 14 | 11.86441 |
| GO:0009792 | embryo development ending in birth or egg hatching | -9.13028 | 6.662419 | 9.162216 | 653 | 17 | 14.40678 |
| GO:0043009 | chordate embryonic development | -8.43984 | 6.478867 | 8.718404 | 632 | 16 | 13.55932 |
| GO:0001701 | in utero embryonic development | -7.44148 | 8.039223 | 8.671928 | 382 | 12 | 10.16949 |
| GO:0048568 | embryonic organ development | -6.72426 | 6.901086 | 7.854717 | 445 | 12 | 10.16949 |
| GO:0009611 | response to wounding | -26.8119 | 17.06102 | 21.1331 | 435 | 29 | 24.57627 |
| GO:0042060 | wound healing | -18.9048 | 16.28552 | 17.48711 | 330 | 21 | 17.79661 |
| GO:0050878 | regulation of body fluid levels | -16.5998 | 13.79597 | 15.53243 | 371 | 20 | 16.94915 |
| GO:0007596 | blood coagulation | -10.0768 | 16.36667 | 12.65841 | 172 | 11 | 9.322034 |
| GO:0050817 | coagulation | -10.0227 | 16.17855 | 12.57635 | 174 | 11 | 9.322034 |
| GO:0007599 | hemostasis | -9.94289 | 15.90434 | 12.45577 | 177 | 11 | 9.322034 |
| GO:0030168 | platelet activation | -8.37104 | 21.32627 | 12.49337 | 96 | 8 | 6.779661 |
| GO:0070527 | platelet aggregation | -4.61439 | 23.80607 | 9.373224 | 43 | 4 | 3.389831 |
| GO:0034109 | homotypic cell-cell adhesion | -4.03987 | 17.06102 | 7.799656 | 60 | 4 | 3.389831 |
| GO:1901699 | cellular response to nitrogen compound | -25.7681 | 12.79576 | 18.89133 | 640 | 32 | 27.11864 |
| GO:0009725 | response to hormone | -24.7899 | 11.21541 | 17.77999 | 753 | 33 | 27.9661 |
| GO:1901652 | response to peptide | -23.9314 | 15.66828 | 19.43515 | 441 | 27 | 22.88136 |
| GO:0071417 | cellular response to organonitrogen compound | -23.2656 | 12.79576 | 17.96578 | 580 | 29 | 24.57627 |
| GO:1901653 | cellular response to peptide | -18.2619 | 16.78133 | 17.34973 | 305 | 20 | 16.94915 |
| GO:0032870 | cellular response to hormone stimulus | -17.9392 | 12.23711 | 15.55997 | 481 | 23 | 19.49153 |
| GO:0043434 | response to peptide hormone | -16.9952 | 14.45849 | 15.95341 | 354 | 20 | 16.94915 |
| GO:0071375 | cellular response to peptide hormone stimulus | -14.8173 | 17.20439 | 15.71933 | 238 | 16 | 13.55932 |
| GO:0032868 | response to insulin | -11.7286 | 16.07197 | 13.62837 | 207 | 13 | 11.01695 |
| GO:0032869 | cellular response to insulin stimulus | -10.7524 | 18.89307 | 13.71346 | 149 | 11 | 9.322034 |
| GO:0048534 | hematopoietic or lymphoid organ development | -25.4565 | 12.50273 | 18.64139 | 655 | 32 | 27.11864 |
| GO:0002520 | immune system development | -24.5855 | 11.71572 | 17.95313 | 699 | 32 | 27.11864 |
| GO:0030097 | hemopoiesis | -21.5153 | 11.82447 | 16.85931 | 606 | 28 | 23.72881 |
| GO:0001775 | cell activation | -20.7537 | 11.07516 | 16.22564 | 647 | 28 | 23.72881 |
| GO:0050865 | regulation of cell activation | -17.4698 | 9.384762 | 14.15037 | 709 | 26 | 22.0339 |
| GO:0045321 | leukocyte activation | -14.8106 | 10.21715 | 13.35673 | 526 | 21 | 17.79661 |
| GO:0046649 | lymphocyte activation | -13.2895 | 11.0467 | 12.93915 | 417 | 18 | 15.25424 |
| GO:0002521 | leukocyte differentiation | -13.2345 | 12.1524 | 13.29519 | 358 | 17 | 14.40678 |
| GO:0050867 | positive regulation of cell activation | -12.5982 | 10.0578 | 12.23402 | 458 | 18 | 15.25424 |
| GO:0045785 | positive regulation of cell adhesion | -12.3932 | 9.780201 | 12.02883 | 471 | 18 | 15.25424 |
| GO:0002694 | regulation of leukocyte activation | -11.962 | 7.826155 | 11.05387 | 654 | 20 | 16.94915 |
| GO:1903706 | regulation of hemopoiesis | -11.3431 | 10.23661 | 11.64751 | 400 | 16 | 13.55932 |
| GO:0022407 | regulation of cell-cell adhesion | -11.2383 | 9.120669 | 11.19704 | 477 | 17 | 14.40678 |
| GO:0002696 | positive regulation of leukocyte activation | -10.7098 | 9.284907 | 10.97732 | 441 | 16 | 13.55932 |
| GO:0070663 | regulation of leukocyte proliferation | -10.5868 | 13.04666 | 12.09966 | 255 | 13 | 11.01695 |
| GO:0070665 | positive regulation of leukocyte proliferation | -10.4457 | 17.70483 | 13.22762 | 159 | 11 | 9.322034 |
| GO:0051251 | positive regulation of lymphocyte activation | -9.34166 | 9.163206 | 10.17593 | 391 | 14 | 11.86441 |
| GO:0042110 | T cell activation | -9.21578 | 11.58862 | 10.84354 | 265 | 12 | 10.16949 |
| GO:1903039 | positive regulation of leukocyte cell-cell adhesion | -9.21578 | 11.58862 | 10.84354 | 265 | 12 | 10.16949 |
| GO:0002683 | negative regulation of immune system process | -8.80909 | 8.332125 | 9.591206 | 430 | 14 | 11.86441 |
| GO:0050670 | regulation of lymphocyte proliferation | -8.71459 | 12.18644 | 10.68957 | 231 | 11 | 9.322034 |
| GO:1903037 | regulation of leukocyte cell-cell adhesion | -8.69036 | 9.139831 | 9.785754 | 364 | 13 | 11.01695 |
| GO:1903131 | mononuclear cell differentiation | -8.68797 | 10.41011 | 10.17261 | 295 | 12 | 10.16949 |
| GO:0032944 | regulation of mononuclear cell proliferation | -8.65583 | 12.0302 | 10.60903 | 234 | 11 | 9.322034 |
| GO:1902105 | regulation of leukocyte differentiation | -8.50915 | 10.03589 | 9.950348 | 306 | 12 | 10.16949 |
| GO:0022409 | positive regulation of cell-cell adhesion | -8.41459 | 9.842894 | 9.83381 | 312 | 12 | 10.16949 |
| GO:0050671 | positive regulation of lymphocyte proliferation | -8.29764 | 16.21998 | 11.38614 | 142 | 9 | 7.627119 |
| GO:0051249 | regulation of lymphocyte activation | -8.2924 | 6.891793 | 8.790481 | 557 | 15 | 12.71186 |
| GO:0032946 | positive regulation of mononuclear cell proliferation | -8.2442 | 15.9947 | 11.29671 | 144 | 9 | 7.627119 |
| GO:0030098 | lymphocyte differentiation | -8.23109 | 10.95357 | 10.03682 | 257 | 11 | 9.322034 |
| GO:0050870 | positive regulation of T cell activation | -7.36548 | 10.53149 | 9.343581 | 243 | 10 | 8.474576 |
| GO:0043366 | beta selection | -7.23537 | 255.9153 | 27.65495 | 3 | 3 | 2.542373 |
| GO:0050863 | regulation of T cell activation | -6.69177 | 7.733703 | 8.095299 | 364 | 11 | 9.322034 |
| GO:1902107 | positive regulation of leukocyte differentiation | -6.29895 | 11.56679 | 8.830823 | 177 | 8 | 6.779661 |
| GO:1903708 | positive regulation of hemopoiesis | -6.29895 | 11.56679 | 8.830823 | 177 | 8 | 6.779661 |
| GO:0046641 | positive regulation of alpha-beta T cell proliferation | -5.73235 | 44.507 | 13.07325 | 23 | 4 | 3.389831 |
| GO:0042102 | positive regulation of T cell proliferation | -5.45864 | 14.76434 | 8.80676 | 104 | 6 | 5.084746 |
| GO:0046634 | regulation of alpha-beta T cell activation | -5.38685 | 14.35039 | 8.664659 | 107 | 6 | 5.084746 |
| GO:0042129 | regulation of T cell proliferation | -5.22369 | 10.23661 | 7.67518 | 175 | 7 | 5.932203 |
| GO:0046635 | positive regulation of alpha-beta T cell activation | -5.14488 | 18.8173 | 9.212568 | 68 | 5 | 4.237288 |
| GO:0046640 | regulation of alpha-beta T cell proliferation | -4.87805 | 27.66651 | 10.16549 | 37 | 4 | 3.389831 |
| GO:0045621 | positive regulation of lymphocyte differentiation | -3.85335 | 10.15537 | 6.450062 | 126 | 5 | 4.237288 |
| GO:0045619 | regulation of lymphocyte differentiation | -3.83223 | 7.601443 | 5.896128 | 202 | 6 | 5.084746 |
| GO:0046637 | regulation of alpha-beta T cell differentiation | -3.80296 | 14.83567 | 7.206365 | 69 | 4 | 3.389831 |
| GO:0050848 | regulation of calcium-mediated signaling | -3.53429 | 12.63779 | 6.568878 | 81 | 4 | 3.389831 |
| GO:0050850 | positive regulation of calcium-mediated signaling | -3.25467 | 18.72551 | 7.113454 | 41 | 3 | 2.542373 |
| GO:0045580 | regulation of T cell differentiation | -3.22996 | 7.439397 | 5.304503 | 172 | 5 | 4.237288 |
| GO:0046638 | positive regulation of alpha-beta T cell differentiation | -3.00127 | 15.35492 | 6.362684 | 50 | 3 | 2.542373 |
| GO:0045582 | positive regulation of T cell differentiation | -2.98821 | 9.058947 | 5.375595 | 113 | 4 | 3.389831 |
| GO:0032496 | response to lipopolysaccharide | -23.3862 | 19.31436 | 20.56359 | 318 | 24 | 20.33898 |
| GO:0002237 | response to molecule of bacterial origin | -22.7227 | 18.11789 | 19.85165 | 339 | 24 | 20.33898 |
| GO:0009617 | response to bacterium | -21.6114 | 10.48833 | 16.27679 | 732 | 30 | 25.42373 |
| GO:0071396 | cellular response to lipid | -21.1624 | 13.22822 | 17.32167 | 503 | 26 | 22.0339 |
| GO:0071345 | cellular response to cytokine stimulus | -16.3739 | 9.011101 | 13.52953 | 710 | 25 | 21.18644 |
| GO:0071216 | cellular response to biotic stimulus | -16.1386 | 18.20318 | 16.72353 | 239 | 17 | 14.40678 |
| GO:0071222 | cellular response to lipopolysaccharide | -14.6159 | 19.19364 | 16.1686 | 200 | 15 | 12.71186 |
| GO:0071219 | cellular response to molecule of bacterial origin | -14.2395 | 18.10721 | 15.65568 | 212 | 15 | 12.71186 |
| GO:0034612 | response to tumor necrosis factor | -11.8638 | 16.46979 | 13.81696 | 202 | 13 | 11.01695 |
| GO:0031663 | lipopolysaccharide-mediated signaling pathway | -8.18092 | 41.49977 | 15.43884 | 37 | 6 | 5.084746 |
| GO:0071356 | cellular response to tumor necrosis factor | -5.17529 | 10.06408 | 7.596482 | 178 | 7 | 5.932203 |
| GO:0006954 | inflammatory response | -20.7369 | 12.72236 | 16.93771 | 523 | 26 | 22.0339 |
| GO:0030155 | regulation of cell adhesion | -20.7336 | 9.767758 | 15.59989 | 786 | 30 | 25.42373 |
| GO:0007162 | negative regulation of cell adhesion | -8.52511 | 10.0688 | 9.970084 | 305 | 12 | 10.16949 |
| GO:0022408 | negative regulation of cell-cell adhesion | -3.8676 | 7.716038 | 5.953471 | 199 | 6 | 5.084746 |
| GO:0010942 | positive regulation of cell death | -20.3371 | 11.42101 | 16.21724 | 605 | 27 | 22.88136 |
| GO:0043068 | positive regulation of programmed cell death | -19.1245 | 11.78247 | 15.8801 | 543 | 25 | 21.18644 |
| GO:0043065 | positive regulation of apoptotic process | -17.0315 | 11.12675 | 14.71738 | 529 | 23 | 19.49153 |
| GO:0071407 | cellular response to organic cyclic compound | -16.3051 | 11.14878 | 14.40511 | 505 | 22 | 18.64407 |
| GO:0062197 | cellular response to chemical stress | -19.4066 | 19.16968 | 18.67783 | 267 | 20 | 16.94915 |
| GO:0000302 | response to reactive oxygen species | -18.6206 | 25.44187 | 20.07523 | 171 | 17 | 14.40678 |
| GO:0006979 | response to oxidative stress | -18.005 | 14.72389 | 16.52187 | 365 | 21 | 17.79661 |
| GO:0010035 | response to inorganic substance | -16.0222 | 10.8064 | 14.14173 | 521 | 22 | 18.64407 |
| GO:0034599 | cellular response to oxidative stress | -15.3889 | 18.697 | 16.46256 | 219 | 16 | 13.55932 |
| GO:0034614 | cellular response to reactive oxygen species | -13.3659 | 26.02528 | 17.05945 | 118 | 12 | 10.16949 |
| GO:0042542 | response to hydrogen peroxide | -9.42885 | 21.72865 | 13.39006 | 106 | 9 | 7.627119 |
| GO:0010038 | response to metal ion | -8.88087 | 9.478343 | 10.00687 | 351 | 13 | 11.01695 |
| GO:0046686 | response to cadmium ion | -8.4749 | 30.36283 | 14.13981 | 59 | 7 | 5.932203 |
| GO:0071276 | cellular response to cadmium ion | -8.18092 | 41.49977 | 15.43884 | 37 | 6 | 5.084746 |
| GO:0071241 | cellular response to inorganic substance | -6.65623 | 10.46926 | 8.82897 | 220 | 9 | 7.627119 |
| GO:0071248 | cellular response to metal ion | -6.06615 | 10.77538 | 8.465953 | 190 | 8 | 6.779661 |
| GO:0009314 | response to radiation | -18.9072 | 13.53115 | 16.4885 | 435 | 23 | 19.49153 |
| GO:0009416 | response to light stimulus | -16.8583 | 15.78698 | 16.33713 | 308 | 19 | 16.10169 |
| GO:0009411 | response to UV | -12.1754 | 20.74989 | 15.08541 | 148 | 12 | 10.16949 |
| GO:0070141 | response to UV-A | -11.038 | 109.678 | 25.47423 | 14 | 6 | 5.084746 |
| GO:0071478 | cellular response to radiation | -9.89047 | 15.72664 | 12.37702 | 179 | 11 | 9.322034 |
| GO:0071482 | cellular response to light stimulus | -7.74838 | 17.8028 | 11.30717 | 115 | 8 | 6.779661 |
| GO:0034644 | cellular response to UV | -7.17776 | 19.90452 | 11.24941 | 90 | 7 | 5.932203 |
| GO:0071492 | cellular response to UV-A | -7.14528 | 93.06009 | 19.12678 | 11 | 4 | 3.389831 |
| GO:1903829 | positive regulation of protein localization | -18.6227 | 13.13851 | 16.2123 | 448 | 23 | 19.49153 |
| GO:0051223 | regulation of protein transport | -17.6646 | 11.89101 | 15.30223 | 495 | 23 | 19.49153 |
| GO:0070201 | regulation of establishment of protein localization | -17.1946 | 11.31933 | 14.86688 | 520 | 23 | 19.49153 |
| GO:0060341 | regulation of cellular localization | -16.0521 | 8.728351 | 13.2669 | 733 | 25 | 21.18644 |
| GO:0051222 | positive regulation of protein transport | -15.9476 | 15.72176 | 15.86009 | 293 | 18 | 15.25424 |
| GO:1904951 | positive regulation of establishment of protein localization | -15.5417 | 14.90768 | 15.39084 | 309 | 18 | 15.25424 |
| GO:0090316 | positive regulation of intracellular protein transport | -9.21358 | 16.40482 | 12.08199 | 156 | 10 | 8.474576 |
| GO:0032386 | regulation of intracellular transport | -9.17392 | 10.02078 | 10.35162 | 332 | 13 | 11.01695 |
| GO:1900182 | positive regulation of protein localization to nucleus | -8.83726 | 24.37288 | 13.43543 | 84 | 8 | 6.779661 |
| GO:0032388 | positive regulation of intracellular transport | -8.21003 | 12.92501 | 10.54423 | 198 | 10 | 8.474576 |
| GO:0033157 | regulation of intracellular protein transport | -7.69919 | 11.42479 | 9.808506 | 224 | 10 | 8.474576 |
| GO:1900180 | regulation of protein localization to nucleus | -7.27909 | 15.51002 | 10.46408 | 132 | 8 | 6.779661 |
| GO:0042307 | positive regulation of protein import into nucleus | -6.36346 | 32.80965 | 12.44992 | 39 | 5 | 4.237288 |
| GO:0042306 | regulation of protein import into nucleus | -5.52614 | 22.44871 | 10.15181 | 57 | 5 | 4.237288 |
| GO:0046822 | regulation of nucleocytoplasmic transport | -5.45864 | 14.76434 | 8.80676 | 104 | 6 | 5.084746 |
| GO:0046824 | positive regulation of nucleocytoplasmic transport | -5.41479 | 21.32627 | 9.870976 | 60 | 5 | 4.237288 |
| GO:0051345 | positive regulation of hydrolase activity | -18.5129 | 11.10743 | 15.34013 | 576 | 25 | 21.18644 |
| GO:0060193 | positive regulation of lipase activity | -12.8691 | 37.6346 | 18.94219 | 68 | 10 | 8.474576 |
| GO:0010518 | positive regulation of phospholipase activity | -12.0698 | 41.87704 | 19.00429 | 55 | 9 | 7.627119 |
| GO:0060191 | regulation of lipase activity | -11.6063 | 28.43503 | 16.32562 | 90 | 10 | 8.474576 |
| GO:0010517 | regulation of phospholipase activity | -11.3203 | 34.89753 | 17.26673 | 66 | 9 | 7.627119 |
| GO:0010863 | positive regulation of phospholipase C activity | -9.71075 | 44.78517 | 17.3556 | 40 | 7 | 5.932203 |
| GO:1900274 | regulation of phospholipase C activity | -9.55307 | 42.65254 | 16.91856 | 42 | 7 | 5.932203 |
| GO:0044344 | cellular response to fibroblast growth factor stimulus | -2.44671 | 9.842894 | 4.897768 | 78 | 3 | 2.542373 |
| GO:0071774 | response to fibroblast growth factor | -2.35629 | 9.139831 | 4.679019 | 84 | 3 | 2.542373 |
| GO:0048732 | gland development | -18.3993 | 14.00531 | 16.4414 | 402 | 22 | 18.64407 |
| GO:0061180 | mammary gland epithelium development | -15.496 | 49.38715 | 22.90196 | 57 | 11 | 9.322034 |
| GO:0030879 | mammary gland development | -13.1462 | 24.96734 | 16.68221 | 123 | 12 | 10.16949 |
| GO:0022612 | gland morphogenesis | -9.57967 | 22.58076 | 13.67403 | 102 | 9 | 7.627119 |
| GO:0060562 | epithelial tube morphogenesis | -7.43709 | 9.169602 | 9.011225 | 307 | 11 | 9.322034 |
| GO:0048754 | branching morphogenesis of an epithelial tube | -7.25356 | 15.3934 | 10.4194 | 133 | 8 | 6.779661 |
| GO:0060603 | mammary gland duct morphogenesis | -7.0355 | 44.12332 | 14.55173 | 29 | 5 | 4.237288 |
| GO:0030522 | intracellular receptor signaling pathway | -7.00911 | 14.31694 | 9.997652 | 143 | 8 | 6.779661 |
| GO:0061138 | morphogenesis of a branching epithelium | -6.59209 | 12.63779 | 9.302314 | 162 | 8 | 6.779661 |
| GO:0001763 | morphogenesis of a branching structure | -6.41282 | 11.97264 | 9.012335 | 171 | 8 | 6.779661 |
| GO:0060443 | mammary gland morphogenesis | -6.198 | 30.4661 | 11.96863 | 42 | 5 | 4.237288 |
| GO:0009755 | hormone-mediated signaling pathway | -6.15169 | 14.10557 | 9.269742 | 127 | 7 | 5.932203 |
| GO:0060444 | branching involved in mammary gland duct morphogenesis | -5.81402 | 46.53005 | 13.3802 | 22 | 4 | 3.389831 |
| GO:0060745 | mammary gland branching involved in pregnancy | -5.69627 | 109.678 | 18.01091 | 7 | 3 | 2.542373 |
| GO:0030518 | intracellular steroid hormone receptor signaling pathway | -5.68481 | 24.14295 | 10.56168 | 53 | 5 | 4.237288 |
| GO:0043401 | steroid hormone mediated signaling pathway | -4.99299 | 17.52844 | 8.855515 | 73 | 5 | 4.237288 |
| GO:0060065 | uterus development | -4.13384 | 36.55932 | 10.20961 | 21 | 3 | 2.542373 |
| GO:0002064 | epithelial cell development | -4.11988 | 8.578165 | 6.369076 | 179 | 6 | 5.084746 |
| GO:2000241 | regulation of reproductive process | -2.16768 | 5.359482 | 3.785509 | 191 | 4 | 3.389831 |
| GO:0071214 | cellular response to abiotic stimulus | -17.9863 | 16.24859 | 17.0395 | 315 | 20 | 16.94915 |
| GO:0104004 | cellular response to environmental stimulus | -17.9863 | 16.24859 | 17.0395 | 315 | 20 | 16.94915 |
| GO:0009612 | response to mechanical stimulus | -14.5196 | 18.90999 | 16.03626 | 203 | 15 | 12.71186 |
| GO:0071496 | cellular response to external stimulus | -11.8708 | 12.46341 | 12.66514 | 308 | 15 | 12.71186 |
| GO:0071260 | cellular response to mechanical stimulus | -9.48201 | 29.24746 | 14.81928 | 70 | 8 | 6.779661 |
| GO:0006935 | chemotaxis | -17.4547 | 11.63251 | 15.1069 | 506 | 23 | 19.49153 |
| GO:0042330 | taxis | -17.417 | 11.58671 | 15.07204 | 508 | 23 | 19.49153 |
| GO:0002685 | regulation of leukocyte migration | -12.7062 | 16.35988 | 14.28846 | 219 | 14 | 11.86441 |
| GO:0050920 | regulation of chemotaxis | -12.5189 | 15.85316 | 14.0378 | 226 | 14 | 11.86441 |
| GO:0050921 | positive regulation of chemotaxis | -12.4654 | 21.93559 | 15.55082 | 140 | 12 | 10.16949 |
| GO:0071675 | regulation of mononuclear cell migration | -10.4516 | 21.8731 | 14.1683 | 117 | 10 | 8.474576 |
| GO:0002688 | regulation of leukocyte chemotaxis | -10.1992 | 20.63833 | 13.72473 | 124 | 10 | 8.474576 |
| GO:0002687 | positive regulation of leukocyte migration | -9.64533 | 18.15002 | 12.78455 | 141 | 10 | 8.474576 |
| GO:0002690 | positive regulation of leukocyte chemotaxis | -8.44422 | 21.78002 | 12.6381 | 94 | 8 | 6.779661 |
| GO:0071622 | regulation of granulocyte chemotaxis | -5.76904 | 25.08973 | 10.78398 | 51 | 5 | 4.237288 |
| GO:0010758 | regulation of macrophage chemotaxis | -5.44051 | 37.91337 | 12.01862 | 27 | 4 | 3.389831 |
| GO:1905521 | regulation of macrophage migration | -4.69764 | 24.96734 | 9.618375 | 41 | 4 | 3.389831 |
| GO:0010759 | positive regulation of macrophage chemotaxis | -4.34229 | 42.65254 | 11.07139 | 18 | 3 | 2.542373 |
| GO:1905523 | positive regulation of macrophage migration | -3.90092 | 30.70983 | 9.307754 | 25 | 3 | 2.542373 |
| GO:0010632 | regulation of epithelial cell migration | -17.3462 | 16.76686 | 16.89797 | 290 | 19 | 16.10169 |
| GO:0010634 | positive regulation of epithelial cell migration | -16.9898 | 23.53244 | 18.66949 | 174 | 16 | 13.55932 |
| GO:0050678 | regulation of epithelial cell proliferation | -15.1341 | 12.72877 | 14.44919 | 382 | 19 | 16.10169 |
| GO:0010594 | regulation of endothelial cell migration | -13.7162 | 16.69013 | 14.96048 | 230 | 15 | 12.71186 |
| GO:0050679 | positive regulation of epithelial cell proliferation | -12.9568 | 17.06102 | 14.62827 | 210 | 14 | 11.86441 |
| GO:0010595 | positive regulation of endothelial cell migration | -12.8139 | 23.44262 | 16.12308 | 131 | 12 | 10.16949 |
| GO:0001936 | regulation of endothelial cell proliferation | -12.5678 | 18.69044 | 14.82611 | 178 | 13 | 11.01695 |
| GO:1901342 | regulation of vasculature development | -11.0259 | 10.87459 | 11.68838 | 353 | 15 | 12.71186 |
| GO:0001938 | positive regulation of endothelial cell proliferation | -10.6813 | 23.05543 | 14.58047 | 111 | 10 | 8.474576 |
| GO:0045765 | regulation of angiogenesis | -10.0188 | 10.32511 | 10.94267 | 347 | 14 | 11.86441 |
| GO:0045766 | positive regulation of angiogenesis | -8.51646 | 13.90844 | 11.0003 | 184 | 10 | 8.474576 |
| GO:1904018 | positive regulation of vasculature development | -8.51646 | 13.90844 | 11.0003 | 184 | 10 | 8.474576 |
| GO:0043535 | regulation of blood vessel endothelial cell migration | -8.0886 | 15.35492 | 11.03882 | 150 | 9 | 7.627119 |
| GO:0043536 | positive regulation of blood vessel endothelial cell migration | -7.73248 | 23.88542 | 12.42866 | 75 | 7 | 5.932203 |
| GO:1902532 | negative regulation of intracellular signal transduction | -16.6796 | 10.7214 | 14.39773 | 549 | 23 | 19.49153 |
| GO:0070482 | response to oxygen levels | -14.1203 | 13.76759 | 14.28998 | 316 | 17 | 14.40678 |
| GO:0080135 | regulation of cellular response to stress | -14.1123 | 8.141149 | 12.17291 | 723 | 23 | 19.49153 |
| GO:0036293 | response to decreased oxygen levels | -13.4756 | 14.11946 | 14.06065 | 290 | 16 | 13.55932 |
| GO:2001233 | regulation of apoptotic signaling pathway | -13.0021 | 11.75827 | 13.04113 | 370 | 17 | 14.40678 |
| GO:0001666 | response to hypoxia | -12.5356 | 13.85823 | 13.46533 | 277 | 15 | 12.71186 |
| GO:2001234 | negative regulation of apoptotic signaling pathway | -12.4147 | 15.57745 | 13.89955 | 230 | 14 | 11.86441 |
| GO:2001243 | negative regulation of intrinsic apoptotic signaling pathway | -11.0523 | 25.08973 | 15.26376 | 102 | 10 | 8.474576 |
| GO:2001242 | regulation of intrinsic apoptotic signaling pathway | -8.82466 | 14.9658 | 11.47076 | 171 | 10 | 8.474576 |
| GO:0036294 | cellular response to decreased oxygen levels | -7.08045 | 14.62373 | 10.11961 | 140 | 8 | 6.779661 |
| GO:0071453 | cellular response to oxygen levels | -6.73921 | 13.20853 | 9.544244 | 155 | 8 | 6.779661 |
| GO:0071456 | cellular response to hypoxia | -6.03846 | 13.57126 | 9.065924 | 132 | 7 | 5.932203 |
| GO:0040008 | regulation of growth | -15.9643 | 9.249949 | 13.46351 | 664 | 24 | 20.33898 |
| GO:0045927 | positive regulation of growth | -15.4971 | 16.66881 | 15.92341 | 261 | 17 | 14.40678 |
| GO:0030307 | positive regulation of cell growth | -12.892 | 19.80297 | 15.3069 | 168 | 13 | 11.01695 |
| GO:0001558 | regulation of cell growth | -8.95364 | 8.550868 | 9.748388 | 419 | 14 | 11.86441 |
| GO:0045787 | positive regulation of cell cycle | -7.75083 | 8.578165 | 9.034209 | 358 | 12 | 10.16949 |
| GO:0090068 | positive regulation of cell cycle process | -6.06244 | 8.892808 | 7.99 | 259 | 9 | 7.627119 |
| GO:0010564 | regulation of cell cycle process | -4.49996 | 4.183901 | 5.469475 | 734 | 12 | 10.16949 |
| GO:0045931 | positive regulation of mitotic cell cycle | -3.80547 | 9.919196 | 6.358359 | 129 | 5 | 4.237288 |
| GO:0007346 | regulation of mitotic cell cycle | -3.69381 | 4.455004 | 4.962935 | 517 | 9 | 7.627119 |
| GO:1901992 | positive regulation of mitotic cell cycle phase transition | -2.13431 | 7.601443 | 4.162191 | 101 | 3 | 2.542373 |
| GO:0008015 | blood circulation | -15.8444 | 12.60666 | 14.74703 | 406 | 20 | 16.94915 |
| GO:0003013 | circulatory system process | -15.299 | 10.81332 | 13.81633 | 497 | 21 | 17.79661 |
| GO:0008217 | regulation of blood pressure | -10.8879 | 16.16307 | 13.13195 | 190 | 12 | 10.16949 |
| GO:0003044 | regulation of systemic arterial blood pressure mediated by a chemical signal | -9.33141 | 39.80904 | 16.31766 | 45 | 7 | 5.932203 |
| GO:0003018 | vascular process in circulatory system | -9.25328 | 11.67674 | 10.89208 | 263 | 12 | 10.16949 |
| GO:0031279 | regulation of cyclase activity | -9.05321 | 25.91547 | 13.88821 | 79 | 8 | 6.779661 |
| GO:0090066 | regulation of anatomical structure size | -8.98456 | 7.755008 | 9.491007 | 495 | 15 | 12.71186 |
| GO:0031281 | positive regulation of cyclase activity | -8.93305 | 35.12562 | 15.27663 | 51 | 7 | 5.932203 |
| GO:0009266 | response to temperature stimulus | -8.87433 | 15.14291 | 11.54771 | 169 | 10 | 8.474576 |
| GO:0035296 | regulation of tube diameter | -8.32466 | 16.33502 | 11.43155 | 141 | 9 | 7.627119 |
| GO:0097746 | blood vessel diameter maintenance | -8.32466 | 16.33502 | 11.43155 | 141 | 9 | 7.627119 |
| GO:0035150 | regulation of tube size | -8.29764 | 16.21998 | 11.38614 | 142 | 9 | 7.627119 |
| GO:0045776 | negative regulation of blood pressure | -7.41825 | 31.33656 | 13.31104 | 49 | 6 | 5.084746 |
| GO:0009409 | response to cold | -7.25927 | 29.52868 | 12.89593 | 52 | 6 | 5.084746 |
| GO:0003073 | regulation of systemic arterial blood pressure | -7.01478 | 18.85691 | 10.91811 | 95 | 7 | 5.932203 |
| GO:0051339 | regulation of lyase activity | -6.19421 | 19.68579 | 10.3494 | 78 | 6 | 5.084746 |
| GO:0051349 | positive regulation of lyase activity | -5.72649 | 24.60724 | 10.67127 | 52 | 5 | 4.237288 |
| GO:0042311 | vasodilation | -4.42319 | 21.32627 | 8.827113 | 48 | 4 | 3.389831 |
| GO:0045444 | fat cell differentiation | -4.18898 | 11.95866 | 7.112379 | 107 | 5 | 4.237288 |
| GO:0003085 | negative regulation of systemic arterial blood pressure | -4.13384 | 36.55932 | 10.20961 | 21 | 3 | 2.542373 |
| GO:0045761 | regulation of adenylate cyclase activity | -4.09771 | 17.64933 | 7.949193 | 58 | 4 | 3.389831 |
| GO:0040014 | regulation of multicellular organism growth | -3.93016 | 15.9947 | 7.521136 | 64 | 4 | 3.389831 |
| GO:0045932 | negative regulation of muscle contraction | -3.90092 | 30.70983 | 9.307754 | 25 | 3 | 2.542373 |
| GO:0002021 | response to dietary excess | -3.66031 | 25.59153 | 8.440279 | 30 | 3 | 2.542373 |
| GO:0007190 | activation of adenylate cyclase activity | -3.66031 | 25.59153 | 8.440279 | 30 | 3 | 2.542373 |
| GO:0050873 | brown fat cell differentiation | -3.66031 | 25.59153 | 8.440279 | 30 | 3 | 2.542373 |
| GO:0001659 | temperature homeostasis | -3.61734 | 24.76599 | 8.291913 | 31 | 3 | 2.542373 |
| GO:0045762 | positive regulation of adenylate cyclase activity | -3.38707 | 20.74989 | 7.528814 | 37 | 3 | 2.542373 |
| GO:0045926 | negative regulation of growth | -3.3825 | 6.267312 | 5.184847 | 245 | 6 | 5.084746 |
| GO:0048640 | negative regulation of developmental growth | -3.01706 | 9.222171 | 5.435538 | 111 | 4 | 3.389831 |
| GO:0048660 | regulation of smooth muscle cell proliferation | -15.6368 | 22.44871 | 17.61681 | 171 | 15 | 12.71186 |
| GO:0048661 | positive regulation of smooth muscle cell proliferation | -12.8717 | 29.32362 | 17.40888 | 96 | 11 | 9.322034 |
| GO:0045428 | regulation of nitric oxide biosynthetic process | -11.5758 | 37.14899 | 17.84568 | 62 | 9 | 7.627119 |
| GO:0080164 | regulation of nitric oxide metabolic process | -11.3826 | 35.43442 | 17.40653 | 65 | 9 | 7.627119 |
| GO:0045429 | positive regulation of nitric oxide biosynthetic process | -11.3456 | 48.74576 | 19.39352 | 42 | 8 | 6.779661 |
| GO:1904407 | positive regulation of nitric oxide metabolic process | -11.1718 | 46.53005 | 18.92936 | 44 | 8 | 6.779661 |
| GO:0043269 | regulation of ion transport | -15.5076 | 8.824664 | 13.08063 | 696 | 24 | 20.33898 |
| GO:0034764 | positive regulation of transmembrane transport | -12.4666 | 15.71409 | 13.96824 | 228 | 14 | 11.86441 |
| GO:0043270 | positive regulation of ion transport | -11.2989 | 12.88782 | 12.47176 | 278 | 14 | 11.86441 |
| GO:0010959 | regulation of metal ion transport | -11.1664 | 9.962638 | 11.45849 | 411 | 16 | 13.55932 |
| GO:0034762 | regulation of transmembrane transport | -10.6244 | 7.651951 | 10.32559 | 602 | 18 | 15.25424 |
| GO:0051924 | regulation of calcium ion transport | -10.5234 | 12.89495 | 12.01796 | 258 | 13 | 11.01695 |
| GO:0034767 | positive regulation of ion transmembrane transport | -6.28039 | 11.50181 | 8.80142 | 178 | 8 | 6.779661 |
| GO:0032409 | regulation of transporter activity | -6.2592 | 7.997352 | 7.881646 | 320 | 10 | 8.474576 |
| GO:0051928 | positive regulation of calcium ion transport | -6.19834 | 14.33125 | 9.354523 | 125 | 7 | 5.932203 |
| GO:1904062 | regulation of cation transmembrane transport | -5.57781 | 6.716936 | 7.033602 | 381 | 10 | 8.474576 |
| GO:0034765 | regulation of ion transmembrane transport | -5.31691 | 5.585452 | 6.502001 | 504 | 11 | 9.322034 |
| GO:0032411 | positive regulation of transporter activity | -5.05791 | 12.586 | 8.031326 | 122 | 6 | 5.084746 |
| GO:0022898 | regulation of transmembrane transporter activity | -4.76902 | 7.183586 | 6.569266 | 285 | 8 | 6.779661 |
| GO:1904064 | positive regulation of cation transmembrane transport | -4.33073 | 9.362753 | 6.725872 | 164 | 6 | 5.084746 |
| GO:1903169 | regulation of calcium ion transmembrane transport | -4.14683 | 8.675093 | 6.414188 | 177 | 6 | 5.084746 |
| GO:0032414 | positive regulation of ion transmembrane transporter activity | -4.11317 | 11.52771 | 6.959694 | 111 | 5 | 4.237288 |
| GO:0032412 | regulation of ion transmembrane transporter activity | -3.96943 | 6.514206 | 5.753482 | 275 | 7 | 5.932203 |
| GO:1904427 | positive regulation of calcium ion transmembrane transport | -3.39679 | 11.63251 | 6.256131 | 88 | 4 | 3.389831 |
| GO:2001257 | regulation of cation channel activity | -3.01523 | 6.66446 | 4.931614 | 192 | 5 | 4.237288 |
| GO:2001259 | positive regulation of cation channel activity | -2.46252 | 9.970724 | 4.936534 | 77 | 3 | 2.542373 |
| GO:0010817 | regulation of hormone levels | -15.2816 | 10.79161 | 13.79985 | 498 | 21 | 17.79661 |
| GO:0120254 | olefinic compound metabolic process | -8.2442 | 15.9947 | 11.29671 | 144 | 9 | 7.627119 |
| GO:0042445 | hormone metabolic process | -8.18906 | 12.86006 | 10.51342 | 199 | 10 | 8.474576 |
| GO:1901615 | organic hydroxy compound metabolic process | -7.38645 | 7.0936 | 8.330176 | 469 | 13 | 11.01695 |
| GO:0016098 | monoterpenoid metabolic process | -5.93806 | 127.9576 | 19.47926 | 6 | 3 | 2.542373 |
| GO:0042178 | xenobiotic catabolic process | -5.58007 | 40.94644 | 12.51477 | 25 | 4 | 3.389831 |
| GO:0006066 | alcohol metabolic process | -5.35428 | 7.288726 | 7.038585 | 316 | 9 | 7.627119 |
| GO:0071466 | cellular response to xenobiotic stimulus | -5.34026 | 10.66314 | 7.866455 | 168 | 7 | 5.932203 |
| GO:0042759 | long-chain fatty acid biosynthetic process | -5.31173 | 35.29866 | 11.5739 | 29 | 4 | 3.389831 |
| GO:0006720 | isoprenoid metabolic process | -5.2056 | 13.3521 | 8.312146 | 115 | 6 | 5.084746 |
| GO:0034754 | cellular hormone metabolic process | -4.97761 | 12.18644 | 7.880976 | 126 | 6 | 5.084746 |
| GO:0006721 | terpenoid metabolic process | -4.39287 | 13.19151 | 7.53246 | 97 | 5 | 4.237288 |
| GO:0042572 | retinol metabolic process | -4.31844 | 20.07178 | 8.53765 | 51 | 4 | 3.389831 |
| GO:0070989 | oxidative demethylation | -4.26889 | 40.40767 | 10.7619 | 19 | 3 | 2.542373 |
| GO:0006805 | xenobiotic metabolic process | -4.16974 | 11.84793 | 7.073455 | 108 | 5 | 4.237288 |
| GO:0008203 | cholesterol metabolic process | -3.98742 | 10.84387 | 6.710452 | 118 | 5 | 4.237288 |
| GO:1902652 | secondary alcohol metabolic process | -3.8213 | 9.99669 | 6.38859 | 128 | 5 | 4.237288 |
| GO:0016125 | sterol metabolic process | -3.74351 | 9.620874 | 6.24066 | 133 | 5 | 4.237288 |
| GO:0001523 | retinoid metabolic process | -3.49372 | 12.33327 | 6.475699 | 83 | 4 | 3.389831 |
| GO:0016101 | diterpenoid metabolic process | -3.43482 | 11.90304 | 6.341775 | 86 | 4 | 3.389831 |
| GO:0008210 | estrogen metabolic process | -3.38707 | 20.74989 | 7.528814 | 37 | 3 | 2.542373 |
| GO:0008202 | steroid metabolic process | -3.29986 | 6.045242 | 5.057408 | 254 | 6 | 5.084746 |
| GO:0034308 | primary alcohol metabolic process | -3.2707 | 10.77538 | 5.97688 | 95 | 4 | 3.389831 |
| GO:0046165 | alcohol biosynthetic process | -3.2707 | 10.77538 | 5.97688 | 95 | 4 | 3.389831 |
| GO:0019748 | secondary metabolic process | -3.02691 | 15.66828 | 6.43613 | 49 | 3 | 2.542373 |
| GO:0070988 | demethylation | -2.65274 | 11.63251 | 5.41599 | 66 | 3 | 2.542373 |
| GO:1901617 | organic hydroxy compound biosynthetic process | -2.34466 | 6.021535 | 4.112271 | 170 | 4 | 3.389831 |
| GO:0016042 | lipid catabolic process | -2.2869 | 4.521471 | 3.727836 | 283 | 5 | 4.237288 |
| GO:0019751 | polyol metabolic process | -2.12256 | 7.526919 | 4.135594 | 102 | 3 | 2.542373 |
| GO:0010638 | positive regulation of organelle organization | -15.1954 | 10.68433 | 13.71817 | 503 | 21 | 17.79661 |
| GO:0044089 | positive regulation of cellular component biogenesis | -12.075 | 9.362753 | 11.71369 | 492 | 18 | 15.25424 |
| GO:0051492 | regulation of stress fiber assembly | -11.5086 | 27.81688 | 16.13465 | 92 | 10 | 8.474576 |
| GO:0110020 | regulation of actomyosin structure organization | -11.0957 | 25.33814 | 15.34513 | 101 | 10 | 8.474576 |
| GO:0032956 | regulation of actin cytoskeleton organization | -10.9395 | 10.72271 | 11.5908 | 358 | 15 | 12.71186 |
| GO:0032231 | regulation of actin filament bundle assembly | -10.8832 | 24.14295 | 14.94962 | 106 | 10 | 8.474576 |
| GO:0051493 | regulation of cytoskeleton organization | -10.5087 | 8.193144 | 10.47401 | 531 | 17 | 14.40678 |
| GO:0032970 | regulation of actin filament-based process | -10.2771 | 9.620874 | 10.85728 | 399 | 15 | 12.71186 |
| GO:0043254 | regulation of protein-containing complex assembly | -9.11626 | 8.802982 | 9.926571 | 407 | 14 | 11.86441 |
| GO:0120035 | regulation of plasma membrane bounded cell projection organization | -8.50838 | 6.551431 | 8.783775 | 625 | 16 | 13.55932 |
| GO:0031344 | regulation of cell projection organization | -8.34345 | 6.37795 | 8.626715 | 642 | 16 | 13.55932 |
| GO:0031334 | positive regulation of protein-containing complex assembly | -8.33837 | 13.32892 | 10.73385 | 192 | 10 | 8.474576 |
| GO:0051495 | positive regulation of cytoskeleton organization | -8.29511 | 13.19151 | 10.66971 | 194 | 10 | 8.474576 |
| GO:0110053 | regulation of actin filament organization | -7.91068 | 10.19952 | 9.61631 | 276 | 11 | 9.322034 |
| GO:1902903 | regulation of supramolecular fiber organization | -7.45393 | 8.060323 | 8.686385 | 381 | 12 | 10.16949 |
| GO:1902743 | regulation of lamellipodium organization | -7.20847 | 28.97154 | 12.76529 | 53 | 6 | 5.084746 |
| GO:0060491 | regulation of cell projection assembly | -7.0451 | 11.63251 | 9.401385 | 198 | 9 | 7.627119 |
| GO:0031346 | positive regulation of cell projection organization | -6.96275 | 8.231192 | 8.423472 | 342 | 11 | 9.322034 |
| GO:1902745 | positive regulation of lamellipodium organization | -6.5433 | 35.54379 | 12.98898 | 36 | 5 | 4.237288 |
| GO:0010591 | regulation of lamellipodium assembly | -6.25169 | 31.20918 | 12.1233 | 41 | 5 | 4.237288 |
| GO:0120032 | regulation of plasma membrane bounded cell projection assembly | -5.96455 | 10.44552 | 8.309269 | 196 | 8 | 6.779661 |
| GO:0051496 | positive regulation of stress fiber assembly | -5.76904 | 25.08973 | 10.78398 | 51 | 5 | 4.237288 |
| GO:0120034 | positive regulation of plasma membrane bounded cell projection assembly | -5.41053 | 14.48577 | 8.711383 | 106 | 6 | 5.084746 |
| GO:0032233 | positive regulation of actin filament bundle assembly | -5.379 | 20.97666 | 9.781868 | 61 | 5 | 4.237288 |
| GO:0010592 | positive regulation of lamellipodium assembly | -5.37487 | 36.55932 | 11.79041 | 28 | 4 | 3.389831 |
| GO:1902905 | positive regulation of supramolecular fiber organization | -5.22369 | 10.23661 | 7.67518 | 175 | 7 | 5.932203 |
| GO:0032273 | positive regulation of protein polymerization | -4.50356 | 13.90844 | 7.766495 | 92 | 5 | 4.237288 |
| GO:0051489 | regulation of filopodium assembly | -4.38751 | 20.89104 | 8.727766 | 49 | 4 | 3.389831 |
| GO:0032271 | regulation of protein polymerization | -3.85574 | 7.677458 | 5.934225 | 200 | 6 | 5.084746 |
| GO:0051491 | positive regulation of filopodium assembly | -3.70483 | 26.47399 | 8.596062 | 29 | 3 | 2.542373 |
| GO:0034248 | regulation of cellular amide metabolic process | -3.57246 | 4.289082 | 4.816738 | 537 | 9 | 7.627119 |
| GO:0034250 | positive regulation of cellular amide metabolic process | -3.28808 | 7.662133 | 5.407178 | 167 | 5 | 4.237288 |
| GO:0032535 | regulation of cellular component size | -3.26777 | 4.989991 | 4.763334 | 359 | 7 | 5.932203 |
| GO:0008361 | regulation of cell size | -3.15172 | 7.148471 | 5.167488 | 179 | 5 | 4.237288 |
| GO:2000112 | regulation of cellular macromolecule biosynthetic process | -2.76643 | 3.630004 | 3.948978 | 564 | 8 | 6.779661 |
| GO:0008064 | regulation of actin polymerization or depolymerization | -2.45751 | 6.478867 | 4.324674 | 158 | 4 | 3.389831 |
| GO:0030832 | regulation of actin filament length | -2.44774 | 6.43812 | 4.306144 | 159 | 4 | 3.389831 |
| GO:0007610 | behavior | -15.1807 | 9.842894 | 13.37334 | 572 | 22 | 18.64407 |
| GO:0007611 | learning or memory | -9.21578 | 11.58862 | 10.84354 | 265 | 12 | 10.16949 |
| GO:0050890 | cognition | -8.49324 | 10.0032 | 9.930702 | 307 | 12 | 10.16949 |
| GO:0007204 | positive regulation of cytosolic calcium ion concentration | -8.33837 | 13.32892 | 10.73385 | 192 | 10 | 8.474576 |
| GO:0050804 | modulation of chemical synaptic transmission | -7.76906 | 7.648042 | 8.747501 | 435 | 13 | 11.01695 |
| GO:0099177 | regulation of trans-synaptic signaling | -7.75732 | 7.630501 | 8.73459 | 436 | 13 | 11.01695 |
| GO:0019233 | sensory perception of pain | -6.33062 | 20.74989 | 10.65389 | 74 | 6 | 5.084746 |
| GO:0008542 | visual learning | -6.14567 | 29.75759 | 11.81928 | 43 | 5 | 4.237288 |
| GO:0007632 | visual behavior | -5.85691 | 26.1138 | 11.0194 | 49 | 5 | 4.237288 |
| GO:0007612 | learning | -5.7249 | 12.18644 | 8.515401 | 147 | 7 | 5.932203 |
| GO:0050806 | positive regulation of synaptic transmission | -5.7249 | 12.18644 | 8.515401 | 147 | 7 | 5.932203 |
| GO:0051966 | regulation of synaptic transmission, glutamatergic | -4.93535 | 17.06102 | 8.722451 | 75 | 5 | 4.237288 |
| GO:0008306 | associative learning | -4.7459 | 15.60459 | 8.294336 | 82 | 5 | 4.237288 |
| GO:0048167 | regulation of synaptic plasticity | -3.80898 | 7.526919 | 5.85855 | 204 | 6 | 5.084746 |
| GO:0051968 | positive regulation of synaptic transmission, glutamatergic | -3.53567 | 23.26502 | 8.015165 | 33 | 3 | 2.542373 |
| GO:2000377 | regulation of reactive oxygen species metabolic process | -15.1222 | 24.37288 | 17.79203 | 147 | 14 | 11.86441 |
| GO:2000379 | positive regulation of reactive oxygen species metabolic process | -11.0238 | 32.43996 | 16.61182 | 71 | 9 | 7.627119 |
| GO:1903426 | regulation of reactive oxygen species biosynthetic process | -5.9023 | 26.65784 | 11.14246 | 48 | 5 | 4.237288 |
| GO:1903428 | positive regulation of reactive oxygen species biosynthetic process | -5.81402 | 46.53005 | 13.3802 | 22 | 4 | 3.389831 |
| GO:0051259 | protein complex oligomerization | -3.3919 | 6.292998 | 5.1994 | 244 | 6 | 5.084746 |
| GO:0051262 | protein tetramerization | -2.2862 | 8.626357 | 4.512819 | 89 | 3 | 2.542373 |
| GO:0050900 | leukocyte migration | -15.0517 | 17.8028 | 16.02141 | 230 | 16 | 13.55932 |
| GO:0007159 | leukocyte cell-cell adhesion | -10.2848 | 36.55932 | 16.6819 | 56 | 8 | 6.779661 |
| GO:0098609 | cell-cell adhesion | -8.50563 | 7.148471 | 9.004204 | 537 | 15 | 12.71186 |
| GO:0045123 | cellular extravasation | -7.83439 | 36.55932 | 14.44359 | 42 | 6 | 5.084746 |
| GO:0061756 | leukocyte adhesion to vascular endothelial cell | -7.57505 | 55.63375 | 16.41668 | 23 | 5 | 4.237288 |
| GO:0050901 | leukocyte tethering or rolling | -5.99031 | 51.18305 | 14.06083 | 20 | 4 | 3.389831 |
| GO:1904996 | positive regulation of leukocyte adhesion to vascular endothelial cell | -5.65448 | 42.65254 | 12.78541 | 24 | 4 | 3.389831 |
| GO:1903238 | positive regulation of leukocyte tethering or rolling | -5.02781 | 69.79507 | 14.29314 | 11 | 3 | 2.542373 |
| GO:1904994 | regulation of leukocyte adhesion to vascular endothelial cell | -4.78536 | 26.24772 | 9.881661 | 39 | 4 | 3.389831 |
| GO:1903236 | regulation of leukocyte tethering or rolling | -4.50331 | 47.98411 | 11.77392 | 16 | 3 | 2.542373 |
| GO:0002691 | regulation of cellular extravasation | -3.31906 | 19.68579 | 7.313399 | 39 | 3 | 2.542373 |
| GO:0000902 | cell morphogenesis | -14.8143 | 8.785151 | 12.76355 | 670 | 23 | 19.49153 |
| GO:0000904 | cell morphogenesis involved in differentiation | -12.6957 | 9.314923 | 12.00259 | 522 | 19 | 16.10169 |
| GO:0031175 | neuron projection development | -10.1808 | 7.186388 | 9.915622 | 641 | 18 | 15.25424 |
| GO:0061564 | axon development | -8.43878 | 8.709158 | 9.497251 | 382 | 13 | 11.01695 |
| GO:0032990 | cell part morphogenesis | -8.1895 | 7.448677 | 8.929449 | 481 | 14 | 11.86441 |
| GO:0032989 | cellular component morphogenesis | -8.11797 | 6.687681 | 8.616945 | 574 | 15 | 12.71186 |
| GO:0048812 | neuron projection morphogenesis | -7.55121 | 7.32797 | 8.508963 | 454 | 13 | 11.01695 |
| GO:0120039 | plasma membrane bounded cell projection morphogenesis | -7.50667 | 7.26397 | 8.460498 | 458 | 13 | 11.01695 |
| GO:0048858 | cell projection morphogenesis | -7.46258 | 7.201079 | 8.412613 | 462 | 13 | 11.01695 |
| GO:0040007 | growth | -6.58622 | 7.547099 | 7.968876 | 373 | 11 | 9.322034 |
| GO:0048589 | developmental growth | -6.58622 | 7.547099 | 7.968876 | 373 | 11 | 9.322034 |
| GO:0048667 | cell morphogenesis involved in neuron differentiation | -6.18091 | 6.866019 | 7.490291 | 410 | 11 | 9.322034 |
| GO:0007163 | establishment or maintenance of cell polarity | -5.89871 | 10.23661 | 8.208531 | 200 | 8 | 6.779661 |
| GO:0060560 | developmental growth involved in morphogenesis | -5.14114 | 13.01264 | 8.188881 | 118 | 6 | 5.084746 |
| GO:0007409 | axonogenesis | -5.07808 | 6.734612 | 6.680135 | 342 | 9 | 7.627119 |
| GO:0030010 | establishment of cell polarity | -5.03757 | 12.48367 | 7.993086 | 123 | 6 | 5.084746 |
| GO:0048813 | dendrite morphogenesis | -4.03987 | 17.06102 | 7.799656 | 60 | 4 | 3.389831 |
| GO:1990138 | neuron projection extension | -3.85261 | 15.27852 | 7.32821 | 67 | 4 | 3.389831 |
| GO:0021954 | central nervous system neuron development | -3.53429 | 12.63779 | 6.568878 | 81 | 4 | 3.389831 |
| GO:0048675 | axon extension | -3.31906 | 19.68579 | 7.313399 | 39 | 3 | 2.542373 |
| GO:0048588 | developmental cell growth | -3.30566 | 11.00711 | 6.053614 | 93 | 4 | 3.389831 |
| GO:0016049 | cell growth | -3.2707 | 10.77538 | 5.97688 | 95 | 4 | 3.389831 |
| GO:0016358 | dendrite development | -3.06142 | 9.478343 | 5.528353 | 108 | 4 | 3.389831 |
| GO:0021953 | central nervous system neuron differentiation | -2.38123 | 6.166633 | 4.180743 | 166 | 4 | 3.389831 |
| GO:0019216 | regulation of lipid metabolic process | -14.7944 | 13.50872 | 14.5496 | 341 | 18 | 15.25424 |
| GO:0045834 | positive regulation of lipid metabolic process | -14.757 | 22.96675 | 17.22851 | 156 | 14 | 11.86441 |
| GO:0090218 | positive regulation of lipid kinase activity | -9.96444 | 48.4164 | 18.07551 | 37 | 7 | 5.932203 |
| GO:0043550 | regulation of lipid kinase activity | -9.5333 | 29.67133 | 14.93358 | 69 | 8 | 6.779661 |
| GO:0043551 | regulation of phosphatidylinositol 3-kinase activity | -8.58281 | 31.42819 | 14.40186 | 57 | 7 | 5.932203 |
| GO:0043552 | positive regulation of phosphatidylinositol 3-kinase activity | -8.4974 | 46.53005 | 16.39032 | 33 | 6 | 5.084746 |
| GO:0009991 | response to extracellular stimulus | -14.4755 | 10.6854 | 13.38296 | 479 | 20 | 16.94915 |
| GO:0031667 | response to nutrient levels | -13.9148 | 10.90222 | 13.1955 | 446 | 19 | 16.10169 |
| GO:0007584 | response to nutrient | -6.9857 | 14.21751 | 9.957811 | 144 | 8 | 6.779661 |
| GO:0033273 | response to vitamin | -3.61877 | 13.2943 | 6.765477 | 77 | 4 | 3.389831 |
| GO:0000165 | MAPK cascade | -13.8849 | 19.90452 | 15.93291 | 180 | 14 | 11.86441 |
| GO:0090398 | cellular senescence | -8.93305 | 35.12562 | 15.27663 | 51 | 7 | 5.932203 |
| GO:0031098 | stress-activated protein kinase signaling cascade | -6.58961 | 22.91778 | 11.24893 | 67 | 6 | 5.084746 |
| GO:0051403 | stress-activated MAPK cascade | -5.30928 | 20.31073 | 9.609869 | 63 | 5 | 4.237288 |
| GO:0007254 | JNK cascade | -3.07991 | 16.33502 | 6.58971 | 47 | 3 | 2.542373 |
| GO:0018105 | peptidyl-serine phosphorylation | -13.7848 | 19.57822 | 15.78863 | 183 | 14 | 11.86441 |
| GO:0018209 | peptidyl-serine modification | -13.072 | 17.3923 | 14.78614 | 206 | 14 | 11.86441 |
| GO:0051098 | regulation of binding | -13.0594 | 11.85439 | 13.10353 | 367 | 17 | 14.40678 |
| GO:0018107 | peptidyl-threonine phosphorylation | -12.5464 | 35.05688 | 18.2468 | 73 | 10 | 8.474576 |
| GO:0018210 | peptidyl-threonine modification | -12.0222 | 31.20918 | 17.1566 | 82 | 10 | 8.474576 |
| GO:0043393 | regulation of protein binding | -12.0027 | 16.88781 | 14.01242 | 197 | 13 | 11.01695 |
| GO:0032091 | negative regulation of protein binding | -6.98329 | 18.66049 | 10.85487 | 96 | 7 | 5.932203 |
| GO:0051100 | negative regulation of binding | -6.53114 | 12.40801 | 9.203152 | 165 | 8 | 6.779661 |
| GO:0043488 | regulation of mRNA stability | -3.33601 | 7.850161 | 5.492433 | 163 | 5 | 4.237288 |
| GO:0043487 | regulation of RNA stability | -3.196 | 7.311864 | 5.244857 | 175 | 5 | 4.237288 |
| GO:0061013 | regulation of mRNA catabolic process | -3.13 | 7.069482 | 5.129692 | 181 | 5 | 4.237288 |
| GO:1903311 | regulation of mRNA metabolic process | -2.88839 | 5.034398 | 4.43535 | 305 | 6 | 5.084746 |
| GO:0001952 | regulation of cell-matrix adhesion | -13.1034 | 24.76599 | 16.60945 | 124 | 12 | 10.16949 |
| GO:0010810 | regulation of cell-substrate adhesion | -12.7335 | 16.43492 | 14.32521 | 218 | 14 | 11.86441 |
| GO:0150116 | regulation of cell-substrate junction organization | -11.1396 | 33.38025 | 16.86539 | 69 | 9 | 7.627119 |
| GO:0051893 | regulation of focal adhesion assembly | -9.80252 | 31.98941 | 15.54386 | 64 | 8 | 6.779661 |
| GO:0090109 | regulation of cell-substrate junction assembly | -9.80252 | 31.98941 | 15.54386 | 64 | 8 | 6.779661 |
| GO:1901888 | regulation of cell junction assembly | -6.97096 | 11.40216 | 9.29077 | 202 | 9 | 7.627119 |
| GO:0150117 | positive regulation of cell-substrate junction organization | -6.88264 | 41.27665 | 14.05245 | 31 | 5 | 4.237288 |
| GO:0051894 | positive regulation of focal adhesion assembly | -5.50883 | 39.37158 | 12.25966 | 26 | 4 | 3.389831 |
| GO:0010811 | positive regulation of cell-substrate adhesion | -5.05791 | 12.586 | 8.031326 | 122 | 6 | 5.084746 |
| GO:0001954 | positive regulation of cell-matrix adhesion | -4.18861 | 18.61202 | 8.188064 | 55 | 4 | 3.389831 |
| GO:0022604 | regulation of cell morphogenesis | -3.68435 | 5.854271 | 5.345535 | 306 | 7 | 5.932203 |
| GO:0008360 | regulation of cell shape | -3.47492 | 8.418265 | 5.742682 | 152 | 5 | 4.237288 |
| GO:1901890 | positive regulation of cell junction assembly | -3.10717 | 9.749153 | 5.624862 | 105 | 4 | 3.389831 |
| GO:1900024 | regulation of substrate adhesion-dependent cell spreading | -2.81404 | 13.237 | 5.842533 | 58 | 3 | 2.542373 |
| GO:0010769 | regulation of cell morphogenesis involved in differentiation | -2.19503 | 7.997352 | 4.300863 | 96 | 3 | 2.542373 |
| GO:0008406 | gonad development | -12.6791 | 16.28552 | 14.25194 | 220 | 14 | 11.86441 |
| GO:0007548 | sex differentiation | -12.5584 | 13.90844 | 13.49326 | 276 | 15 | 12.71186 |
| GO:0045137 | development of primary sexual characteristics | -12.5453 | 15.92362 | 14.07292 | 225 | 14 | 11.86441 |
| GO:0046660 | female sex differentiation | -10.4516 | 21.8731 | 14.1683 | 117 | 10 | 8.474576 |
| GO:0048511 | rhythmic process | -10.3582 | 12.50714 | 11.80658 | 266 | 13 | 11.01695 |
| GO:0034405 | response to fluid shear stress | -10.2421 | 52.68843 | 18.88741 | 34 | 7 | 5.932203 |
| GO:0008585 | female gonad development | -9.73702 | 23.50242 | 13.97472 | 98 | 9 | 7.627119 |
| GO:0046545 | development of primary female sexual characteristics | -9.57967 | 22.58076 | 13.67403 | 102 | 9 | 7.627119 |
| GO:0042698 | ovulation cycle | -7.98884 | 25.96242 | 13.00178 | 69 | 7 | 5.932203 |
| GO:0022602 | ovulation cycle process | -7.47359 | 31.98941 | 13.4578 | 48 | 6 | 5.084746 |
| GO:0001541 | ovarian follicle development | -7.10991 | 27.91803 | 12.51455 | 55 | 6 | 5.084746 |
| GO:0030728 | ovulation | -6.08591 | 53.8769 | 14.44024 | 19 | 4 | 3.389831 |
| GO:0001542 | ovulation from ovarian follicle | -5.16488 | 76.77458 | 15.01033 | 10 | 3 | 2.542373 |
| GO:0007292 | female gamete generation | -4.5478 | 10.23661 | 7.102879 | 150 | 6 | 5.084746 |
| GO:0071498 | cellular response to fluid shear stress | -4.13384 | 36.55932 | 10.20961 | 21 | 3 | 2.542373 |
| GO:0010543 | regulation of platelet activation | -12.4672 | 46.06475 | 19.97453 | 50 | 9 | 7.627119 |
| GO:0010572 | positive regulation of platelet activation | -7.34026 | 102.3661 | 20.07981 | 10 | 4 | 3.389831 |
| GO:0009410 | response to xenobiotic stimulus | -12.4384 | 10.84928 | 12.43581 | 401 | 17 | 14.40678 |
| GO:0048729 | tissue morphogenesis | -12.199 | 8.729605 | 11.53247 | 557 | 19 | 16.10169 |
| GO:0002009 | morphogenesis of an epithelium | -10.6227 | 9.160278 | 10.88659 | 447 | 16 | 13.55932 |
| GO:0060322 | head development | -10.4947 | 6.487079 | 9.781907 | 789 | 20 | 16.94915 |
| GO:0030855 | epithelial cell differentiation | -9.96177 | 7.553054 | 9.945619 | 576 | 17 | 14.40678 |
| GO:0045165 | cell fate commitment | -9.62597 | 12.586 | 11.38112 | 244 | 12 | 10.16949 |
| GO:0007420 | brain development | -8.28267 | 5.847526 | 8.385297 | 744 | 17 | 14.40678 |
| GO:0097305 | response to alcohol | -12.1872 | 14.99085 | 13.60077 | 239 | 14 | 11.86441 |
| GO:0045471 | response to ethanol | -7.6315 | 17.20439 | 11.09324 | 119 | 8 | 6.779661 |
| GO:0008283 | cell population proliferation | -12.075 | 9.362753 | 11.71369 | 492 | 18 | 15.25424 |
| GO:0032943 | mononuclear cell proliferation | -5.97271 | 18.06461 | 9.867627 | 85 | 6 | 5.084746 |
| GO:0070661 | leukocyte proliferation | -5.63526 | 15.82981 | 9.162521 | 97 | 6 | 5.084746 |
| GO:0046651 | lymphocyte proliferation | -4.69496 | 15.23305 | 8.181584 | 84 | 5 | 4.237288 |
| GO:0042100 | B cell proliferation | -3.19355 | 17.85455 | 6.927169 | 43 | 3 | 2.542373 |
| GO:0018958 | phenol-containing compound metabolic process | -2.2862 | 8.626357 | 4.512819 | 89 | 3 | 2.542373 |
| GO:0050778 | positive regulation of immune response | -12.0635 | 8.575643 | 11.4057 | 567 | 19 | 16.10169 |
| GO:0002253 | activation of immune response | -9.17392 | 10.02078 | 10.35162 | 332 | 13 | 11.01695 |
| GO:0002764 | immune response-regulating signaling pathway | -8.5909 | 8.967381 | 9.67123 | 371 | 13 | 11.01695 |
| GO:0002768 | immune response-regulating cell surface receptor signaling pathway | -7.70522 | 9.740719 | 9.351454 | 289 | 11 | 9.322034 |
| GO:0002429 | immune response-activating cell surface receptor signaling pathway | -6.06244 | 8.892808 | 7.99 | 259 | 9 | 7.627119 |
| GO:0002757 | immune response-activating signal transduction | -6.06244 | 8.892808 | 7.99 | 259 | 9 | 7.627119 |
| GO:0050851 | antigen receptor-mediated signaling pathway | -3.82057 | 7.563998 | 5.877275 | 203 | 6 | 5.084746 |
| GO:0050853 | B cell receptor signaling pathway | -3.00256 | 9.139831 | 5.405379 | 112 | 4 | 3.389831 |
| GO:0050852 | T cell receptor signaling pathway | -2.11095 | 7.453842 | 4.109356 | 103 | 3 | 2.542373 |
| GO:0044403 | biological process involved in symbiotic interaction | -12.0407 | 14.62373 | 13.41043 | 245 | 14 | 11.86441 |
| GO:0051701 | biological process involved in interaction with host | -9.4092 | 17.17552 | 12.39711 | 149 | 10 | 8.474576 |
| GO:0052126 | movement in host environment | -8.49129 | 17.06102 | 11.71407 | 135 | 9 | 7.627119 |
| GO:0044409 | entry into host | -7.9639 | 18.95669 | 11.70876 | 108 | 8 | 6.779661 |
| GO:0019058 | viral life cycle | -7.40035 | 12.79576 | 9.94158 | 180 | 9 | 7.627119 |
| GO:0016032 | viral process | -7.28244 | 10.31916 | 9.229716 | 248 | 10 | 8.474576 |
| GO:0046718 | viral entry into host cell | -6.68665 | 16.90006 | 10.27094 | 106 | 7 | 5.932203 |
| GO:0048871 | multicellular organismal homeostasis | -11.9797 | 11.28001 | 12.3415 | 363 | 16 | 13.55932 |
| GO:0060249 | anatomical structure homeostasis | -10.101 | 11.92437 | 11.48177 | 279 | 13 | 11.01695 |
| GO:0001894 | tissue homeostasis | -9.81376 | 13.06801 | 11.63218 | 235 | 12 | 10.16949 |
| GO:0010469 | regulation of signaling receptor activity | -8.77561 | 14.79279 | 11.39509 | 173 | 10 | 8.474576 |
| GO:0048771 | tissue remodeling | -7.01478 | 18.85691 | 10.91811 | 95 | 7 | 5.932203 |
| GO:2000273 | positive regulation of signaling receptor activity | -6.04483 | 28.43503 | 11.53534 | 45 | 5 | 4.237288 |
| GO:0090594 | inflammatory response to wounding | -5.31854 | 85.30508 | 15.8429 | 9 | 3 | 2.542373 |
| GO:0010574 | regulation of vascular endothelial growth factor production | -2.79261 | 13.01264 | 5.784743 | 59 | 3 | 2.542373 |
| GO:0099601 | regulation of neurotransmitter receptor activity | -2.75089 | 12.586 | 5.673255 | 61 | 3 | 2.542373 |
| GO:1901214 | regulation of neuron death | -11.7506 | 12.22525 | 12.52349 | 314 | 15 | 12.71186 |
| GO:0097190 | apoptotic signaling pathway | -11.4696 | 13.26968 | 12.68412 | 270 | 14 | 11.86441 |
| GO:0043523 | regulation of neuron apoptotic process | -9.21707 | 13.59936 | 11.39258 | 207 | 11 | 9.322034 |
| GO:0009791 | post-embryonic development | -8.71426 | 23.53244 | 13.18224 | 87 | 8 | 6.779661 |
| GO:1901215 | negative regulation of neuron death | -7.98543 | 12.24475 | 10.21706 | 209 | 10 | 8.474576 |
| GO:0043524 | negative regulation of neuron apoptotic process | -6.96245 | 14.11946 | 9.918366 | 145 | 8 | 6.779661 |
| GO:0097193 | intrinsic apoptotic signaling pathway | -6.8712 | 13.74042 | 9.764404 | 149 | 8 | 6.779661 |
| GO:0008631 | intrinsic apoptotic signaling pathway in response to oxidative stress | -6.18726 | 56.87006 | 14.85045 | 18 | 4 | 3.389831 |
| GO:0036473 | cell death in response to oxidative stress | -5.65448 | 42.65254 | 12.78541 | 24 | 4 | 3.389831 |
| GO:0048678 | response to axon injury | -4.15773 | 18.27966 | 8.106384 | 56 | 4 | 3.389831 |
| GO:0031103 | axon regeneration | -3.90092 | 30.70983 | 9.307754 | 25 | 3 | 2.542373 |
| GO:0031102 | neuron projection regeneration | -3.61734 | 24.76599 | 8.291913 | 31 | 3 | 2.542373 |
| GO:0031099 | regeneration | -3.51477 | 8.58776 | 5.815348 | 149 | 5 | 4.237288 |
| GO:0043473 | pigmentation | -2.12256 | 7.526919 | 4.135594 | 102 | 3 | 2.542373 |
| GO:0051046 | regulation of secretion | -11.5099 | 7.971131 | 10.89417 | 610 | 19 | 16.10169 |
| GO:1903530 | regulation of secretion by cell | -11.2174 | 8.314936 | 10.88381 | 554 | 18 | 15.25424 |
| GO:1903532 | positive regulation of secretion by cell | -10.1592 | 12.05398 | 11.55478 | 276 | 13 | 11.01695 |
| GO:0051047 | positive regulation of secretion | -9.65908 | 10.97986 | 10.9353 | 303 | 13 | 11.01695 |
| GO:0050708 | regulation of protein secretion | -9.4653 | 12.18644 | 11.16881 | 252 | 12 | 10.16949 |
| GO:0050714 | positive regulation of protein secretion | -7.38337 | 15.9947 | 10.64781 | 128 | 8 | 6.779661 |
| GO:0046883 | regulation of hormone secretion | -6.46182 | 9.927747 | 8.54979 | 232 | 9 | 7.627119 |
| GO:0050796 | regulation of insulin secretion | -5.7249 | 12.18644 | 8.515401 | 147 | 7 | 5.932203 |
| GO:0090276 | regulation of peptide hormone secretion | -5.19132 | 10.12094 | 7.622506 | 177 | 7 | 5.932203 |
| GO:0002791 | regulation of peptide secretion | -5.14353 | 9.95226 | 7.545049 | 180 | 7 | 5.932203 |
| GO:0090087 | regulation of peptide transport | -5.09661 | 9.789108 | 7.46939 | 183 | 7 | 5.932203 |
| GO:0046887 | positive regulation of hormone secretion | -3.91918 | 10.48833 | 6.577239 | 122 | 5 | 4.237288 |
| GO:0032024 | positive regulation of insulin secretion | -3.85261 | 15.27852 | 7.32821 | 67 | 4 | 3.389831 |
| GO:0090277 | positive regulation of peptide hormone secretion | -3.34145 | 11.24902 | 6.132723 | 91 | 4 | 3.389831 |
| GO:0002793 | positive regulation of peptide secretion | -3.30566 | 11.00711 | 6.053614 | 93 | 4 | 3.389831 |
| GO:0060627 | regulation of vesicle-mediated transport | -11.4683 | 8.610233 | 11.12375 | 535 | 18 | 15.25424 |
| GO:0030100 | regulation of endocytosis | -8.0053 | 12.30362 | 10.24578 | 208 | 10 | 8.474576 |
| GO:0048259 | regulation of receptor-mediated endocytosis | -5.31721 | 13.95901 | 8.528166 | 110 | 6 | 5.084746 |
| GO:0045807 | positive regulation of endocytosis | -4.39287 | 13.19151 | 7.53246 | 97 | 5 | 4.237288 |
| GO:0048260 | positive regulation of receptor-mediated endocytosis | -4.25221 | 19.31436 | 8.35807 | 53 | 4 | 3.389831 |
| GO:0002090 | regulation of receptor internalization | -4.09771 | 17.64933 | 7.949193 | 58 | 4 | 3.389831 |
| GO:0002092 | positive regulation of receptor internalization | -3.799 | 28.43503 | 8.93257 | 27 | 3 | 2.542373 |
| GO:1903034 | regulation of response to wounding | -11.4579 | 18.06461 | 13.97467 | 170 | 12 | 10.16949 |
| GO:0061041 | regulation of wound healing | -9.7689 | 18.67995 | 12.99043 | 137 | 10 | 8.474576 |
| GO:1903036 | positive regulation of response to wounding | -9.14376 | 26.5886 | 14.08125 | 77 | 8 | 6.779661 |
| GO:0090303 | positive regulation of wound healing | -8.2705 | 28.43503 | 13.65287 | 63 | 7 | 5.932203 |
| GO:0030195 | negative regulation of blood coagulation | -7.64745 | 34.12203 | 13.9265 | 45 | 6 | 5.084746 |
| GO:1900047 | negative regulation of hemostasis | -7.58814 | 33.38025 | 13.76528 | 46 | 6 | 5.084746 |
| GO:0050819 | negative regulation of coagulation | -7.41825 | 31.33656 | 13.31104 | 49 | 6 | 5.084746 |
| GO:0030193 | regulation of blood coagulation | -6.51274 | 22.2535 | 11.06998 | 69 | 6 | 5.084746 |
| GO:1900046 | regulation of hemostasis | -6.43824 | 21.62664 | 10.89842 | 71 | 6 | 5.084746 |
| GO:0061045 | negative regulation of wound healing | -6.36596 | 21.03413 | 10.73377 | 73 | 6 | 5.084746 |
| GO:0050818 | regulation of coagulation | -6.33062 | 20.74989 | 10.65389 | 74 | 6 | 5.084746 |
| GO:0042730 | fibrinolysis | -6.18726 | 56.87006 | 14.85045 | 18 | 4 | 3.389831 |
| GO:1903035 | negative regulation of response to wounding | -5.85481 | 17.25271 | 9.617379 | 89 | 6 | 5.084746 |
| GO:0051918 | negative regulation of fibrinolysis | -4.79141 | 59.05737 | 13.11346 | 13 | 3 | 2.542373 |
| GO:0051917 | regulation of fibrinolysis | -4.34229 | 42.65254 | 11.07139 | 18 | 3 | 2.542373 |
| GO:0010544 | negative regulation of platelet activation | -4.26889 | 40.40767 | 10.7619 | 19 | 3 | 2.542373 |
| GO:0030194 | positive regulation of blood coagulation | -3.75102 | 27.41949 | 8.759913 | 28 | 3 | 2.542373 |
| GO:1900048 | positive regulation of hemostasis | -3.75102 | 27.41949 | 8.759913 | 28 | 3 | 2.542373 |
| GO:0050820 | positive regulation of coagulation | -3.70483 | 26.47399 | 8.596062 | 29 | 3 | 2.542373 |
| GO:0008285 | negative regulation of cell population proliferation | -11.4413 | 6.83743 | 10.38615 | 786 | 21 | 17.79661 |
| GO:0050680 | negative regulation of epithelial cell proliferation | -4.33073 | 9.362753 | 6.725872 | 164 | 6 | 5.084746 |
| GO:0001937 | negative regulation of endothelial cell proliferation | -3.64064 | 13.46922 | 6.816922 | 76 | 4 | 3.389831 |
| GO:0046903 | secretion | -11.0545 | 8.878692 | 11.01284 | 490 | 17 | 14.40678 |
| GO:0140352 | export from cell | -5.94959 | 6.501311 | 7.221729 | 433 | 11 | 9.322034 |
| GO:0038095 | Fc-epsilon receptor signaling pathway | -5.65448 | 42.65254 | 12.78541 | 24 | 4 | 3.389831 |
| GO:0032940 | secretion by cell | -5.60831 | 6.770245 | 7.070829 | 378 | 10 | 8.474576 |
| GO:0006887 | exocytosis | -5.51769 | 9.099209 | 7.637527 | 225 | 8 | 6.779661 |
| GO:0023061 | signal release | -3.39781 | 8.098584 | 5.603176 | 158 | 5 | 4.237288 |
| GO:0002275 | myeloid cell activation involved in immune response | -2.85813 | 13.70975 | 5.962506 | 56 | 3 | 2.542373 |
| GO:0002886 | regulation of myeloid leukocyte mediated immunity | -2.79261 | 13.01264 | 5.784743 | 59 | 3 | 2.542373 |
| GO:0045055 | regulated exocytosis | -2.76374 | 7.874316 | 4.919635 | 130 | 4 | 3.389831 |
| GO:0140029 | exocytic process | -2.57983 | 10.9678 | 5.229342 | 70 | 3 | 2.542373 |
| GO:0001667 | ameboidal-type cell migration | -11.0241 | 16.59991 | 13.33022 | 185 | 12 | 10.16949 |
| GO:0010631 | epithelial cell migration | -8.63478 | 23.00362 | 13.02042 | 89 | 8 | 6.779661 |
| GO:0090132 | epithelium migration | -8.5191 | 22.2535 | 12.78739 | 92 | 8 | 6.779661 |
| GO:0090130 | tissue migration | -8.29949 | 20.89104 | 12.35297 | 98 | 8 | 6.779661 |
| GO:0043542 | endothelial cell migration | -8.07968 | 26.73741 | 13.20929 | 67 | 7 | 5.932203 |
| GO:0002040 | sprouting angiogenesis | -5.45123 | 21.68773 | 9.962274 | 59 | 5 | 4.237288 |
| GO:0010762 | regulation of fibroblast migration | -4.97627 | 29.24746 | 10.47273 | 35 | 4 | 3.389831 |
| GO:0010763 | positive regulation of fibroblast migration | -4.59225 | 51.18305 | 12.17602 | 15 | 3 | 2.542373 |
| GO:0002042 | cell migration involved in sprouting angiogenesis | -4.13384 | 36.55932 | 10.20961 | 21 | 3 | 2.542373 |
| GO:0043534 | blood vessel endothelial cell migration | -3.61734 | 24.76599 | 8.291913 | 31 | 3 | 2.542373 |
| GO:0043491 | protein kinase B signaling | -3.35259 | 20.20384 | 7.419047 | 38 | 3 | 2.542373 |
| GO:0030162 | regulation of proteolysis | -10.9392 | 6.870208 | 10.16134 | 745 | 20 | 16.94915 |
| GO:0052547 | regulation of peptidase activity | -10.4944 | 8.979483 | 10.75365 | 456 | 16 | 13.55932 |
| GO:2000116 | regulation of cysteine-type endopeptidase activity | -9.94337 | 13.41041 | 11.80733 | 229 | 12 | 10.16949 |
| GO:0052548 | regulation of endopeptidase activity | -9.88096 | 9.011101 | 10.42982 | 426 | 15 | 12.71186 |
| GO:0043281 | regulation of cysteine-type endopeptidase activity involved in apoptotic process | -9.28432 | 13.79935 | 11.48867 | 204 | 11 | 9.322034 |
| GO:0060759 | regulation of response to cytokine stimulus | -7.44221 | 12.93954 | 10.00636 | 178 | 9 | 7.627119 |
| GO:0045862 | positive regulation of proteolysis | -6.63277 | 7.62891 | 8.024536 | 369 | 11 | 9.322034 |
| GO:0001959 | regulation of cytokine-mediated signaling pathway | -6.5111 | 12.33327 | 9.170668 | 166 | 8 | 6.779661 |
| GO:0010950 | positive regulation of endopeptidase activity | -6.35535 | 11.76622 | 8.920466 | 174 | 8 | 6.779661 |
| GO:0010952 | positive regulation of peptidase activity | -6.03189 | 10.66314 | 8.412956 | 192 | 8 | 6.779661 |
| GO:2001056 | positive regulation of cysteine-type endopeptidase activity | -5.80498 | 12.52732 | 8.654102 | 143 | 7 | 5.932203 |
| GO:0032731 | positive regulation of interleukin-1 beta production | -5.30928 | 20.31073 | 9.609869 | 63 | 5 | 4.237288 |
| GO:0032651 | regulation of interleukin-1 beta production | -5.29445 | 13.83326 | 8.483849 | 111 | 6 | 5.084746 |
| GO:0043280 | positive regulation of cysteine-type endopeptidase activity involved in apoptotic process | -4.99742 | 12.28393 | 7.91792 | 125 | 6 | 5.084746 |
| GO:0032732 | positive regulation of interleukin-1 production | -4.96396 | 17.29157 | 8.788333 | 74 | 5 | 4.237288 |
| GO:0032652 | regulation of interleukin-1 production | -4.90004 | 11.81147 | 7.737279 | 130 | 6 | 5.084746 |
| GO:0043124 | negative regulation of I-kappaB kinase/NF-kappaB signaling | -4.31844 | 20.07178 | 8.53765 | 51 | 4 | 3.389831 |
| GO:0010803 | regulation of tumor necrosis factor-mediated signaling pathway | -4.12744 | 17.95897 | 8.026791 | 57 | 4 | 3.389831 |
| GO:0043122 | regulation of I-kappaB kinase/NF-kappaB signaling | -3.29088 | 6.021535 | 5.043627 | 255 | 6 | 5.084746 |
| GO:0043123 | positive regulation of I-kappaB kinase/NF-kappaB signaling | -2.18354 | 5.416196 | 3.814499 | 189 | 4 | 3.389831 |
| GO:0044283 | small molecule biosynthetic process | -10.8731 | 9.522428 | 11.14825 | 430 | 16 | 13.55932 |
| GO:0006690 | icosanoid metabolic process | -9.11087 | 20.02815 | 12.80469 | 115 | 9 | 7.627119 |
| GO:0046456 | icosanoid biosynthetic process | -8.99577 | 35.82814 | 15.43725 | 50 | 7 | 5.932203 |
| GO:0006633 | fatty acid biosynthetic process | -7.66032 | 17.35019 | 11.14574 | 118 | 8 | 6.779661 |
| GO:0046394 | carboxylic acid biosynthetic process | -6.99814 | 9.620874 | 8.845212 | 266 | 10 | 8.474576 |
| GO:0016053 | organic acid biosynthetic process | -6.96788 | 9.549077 | 8.804754 | 268 | 10 | 8.474576 |
| GO:0033559 | unsaturated fatty acid metabolic process | -6.77235 | 17.3923 | 10.43747 | 103 | 7 | 5.932203 |
| GO:0072330 | monocarboxylic acid biosynthetic process | -6.61267 | 12.71629 | 9.335952 | 161 | 8 | 6.779661 |
| GO:0001676 | long-chain fatty acid metabolic process | -6.54947 | 16.1388 | 10.008 | 111 | 7 | 5.932203 |
| GO:0009636 | response to toxic substance | -6.50936 | 10.0578 | 8.617644 | 229 | 9 | 7.627119 |
| GO:0008610 | lipid biosynthetic process | -6.41511 | 5.836664 | 7.301568 | 570 | 13 | 11.01695 |
| GO:0006692 | prostanoid metabolic process | -6.36346 | 32.80965 | 12.44992 | 39 | 5 | 4.237288 |
| GO:0006693 | prostaglandin metabolic process | -6.36346 | 32.80965 | 12.44992 | 39 | 5 | 4.237288 |
| GO:0006631 | fatty acid metabolic process | -6.19798 | 7.874316 | 7.803972 | 325 | 10 | 8.474576 |
| GO:0001516 | prostaglandin biosynthetic process | -5.89985 | 48.74576 | 13.70852 | 21 | 4 | 3.389831 |
| GO:0046457 | prostanoid biosynthetic process | -5.89985 | 48.74576 | 13.70852 | 21 | 4 | 3.389831 |
| GO:0019369 | arachidonic acid metabolic process | -5.48834 | 22.06166 | 10.05585 | 58 | 5 | 4.237288 |
| GO:1990748 | cellular detoxification | -5.43446 | 14.62373 | 8.758745 | 105 | 6 | 5.084746 |
| GO:0032787 | monocarboxylic acid metabolic process | -5.4162 | 5.721683 | 6.61365 | 492 | 11 | 9.322034 |
| GO:0097237 | cellular response to toxic substance | -5.2496 | 13.58842 | 8.396909 | 113 | 6 | 5.084746 |
| GO:0098754 | detoxification | -4.86223 | 11.63251 | 7.667768 | 132 | 6 | 5.084746 |
| GO:0006636 | unsaturated fatty acid biosynthetic process | -4.78536 | 26.24772 | 9.881661 | 39 | 4 | 3.389831 |
| GO:0098869 | cellular oxidant detoxification | -4.54967 | 14.21751 | 7.865278 | 90 | 5 | 4.237288 |
| GO:0044057 | regulation of system process | -10.8525 | 7.901329 | 10.5389 | 583 | 18 | 15.25424 |
| GO:0090257 | regulation of muscle system process | -7.20123 | 10.11523 | 9.11905 | 253 | 10 | 8.474576 |
| GO:0006937 | regulation of muscle contraction | -4.20177 | 8.875674 | 6.506587 | 173 | 6 | 5.084746 |
| GO:0019229 | regulation of vasoconstriction | -3.93016 | 15.9947 | 7.521136 | 64 | 4 | 3.389831 |
| GO:0006940 | regulation of smooth muscle contraction | -3.90389 | 15.74863 | 7.455404 | 65 | 4 | 3.389831 |
| GO:0045987 | positive regulation of smooth muscle contraction | -3.61734 | 24.76599 | 8.291913 | 31 | 3 | 2.542373 |
| GO:0045907 | positive regulation of vasoconstriction | -3.53567 | 23.26502 | 8.015165 | 33 | 3 | 2.542373 |
| GO:0045933 | positive regulation of muscle contraction | -3.05312 | 15.9947 | 6.511767 | 48 | 3 | 2.542373 |
| GO:0090049 | regulation of cell migration involved in sprouting angiogenesis | -2.44671 | 9.842894 | 4.897768 | 78 | 3 | 2.542373 |
| GO:0019725 | cellular homeostasis | -10.4043 | 7.417833 | 10.12141 | 621 | 18 | 15.25424 |
| GO:0055082 | cellular chemical homeostasis | -8.68287 | 7.368002 | 9.183242 | 521 | 15 | 12.71186 |
| GO:0055080 | cation homeostasis | -8.14409 | 7.387244 | 8.88168 | 485 | 14 | 11.86441 |
| GO:0098771 | inorganic ion homeostasis | -8.04347 | 7.252659 | 8.776164 | 494 | 14 | 11.86441 |
| GO:0050801 | ion homeostasis | -7.859 | 7.011377 | 8.583912 | 511 | 14 | 11.86441 |
| GO:0055065 | metal ion homeostasis | -7.23536 | 7.696699 | 8.433938 | 399 | 12 | 10.16949 |
| GO:0030003 | cellular cation homeostasis | -6.35082 | 7.144842 | 7.689632 | 394 | 11 | 9.322034 |
| GO:0006873 | cellular ion homeostasis | -6.1913 | 6.882806 | 7.502435 | 409 | 11 | 9.322034 |
| GO:0055074 | calcium ion homeostasis | -5.77128 | 9.842894 | 8.015338 | 208 | 8 | 6.779661 |
| GO:0006875 | cellular metal ion homeostasis | -5.35428 | 7.288726 | 7.038585 | 316 | 9 | 7.627119 |
| GO:0072507 | divalent inorganic cation homeostasis | -5.15595 | 8.124294 | 7.113063 | 252 | 8 | 6.779661 |
| GO:0006874 | cellular calcium ion homeostasis | -4.041 | 8.299954 | 6.237855 | 185 | 6 | 5.084746 |
| GO:0072503 | cellular divalent inorganic cation homeostasis | -3.63179 | 6.979507 | 5.575186 | 220 | 6 | 5.084746 |
| GO:0030641 | regulation of cellular pH | -3.39679 | 11.63251 | 6.256131 | 88 | 4 | 3.389831 |
| GO:0006885 | regulation of pH | -3.21973 | 10.44552 | 5.865968 | 98 | 4 | 3.389831 |
| GO:0030004 | cellular monovalent inorganic cation homeostasis | -3.01706 | 9.222171 | 5.435538 | 111 | 4 | 3.389831 |
| GO:0055067 | monovalent inorganic cation homeostasis | -2.58059 | 7.011377 | 4.560345 | 146 | 4 | 3.389831 |
| GO:0051453 | regulation of intracellular pH | -2.37086 | 9.249949 | 4.713927 | 83 | 3 | 2.542373 |
| GO:1904645 | response to amyloid-beta | -10.3504 | 37.22404 | 16.84104 | 55 | 8 | 6.779661 |
| GO:1904646 | cellular response to amyloid-beta | -6.04483 | 28.43503 | 11.53534 | 45 | 5 | 4.237288 |
| GO:0030902 | hindbrain development | -3.55551 | 8.764221 | 5.890086 | 146 | 5 | 4.237288 |
| GO:0021761 | limbic system development | -3.07651 | 9.566925 | 5.560099 | 107 | 4 | 3.389831 |
| GO:0022037 | metencephalon development | -3.07651 | 9.566925 | 5.560099 | 107 | 4 | 3.389831 |
| GO:0010975 | regulation of neuron projection development | -2.796 | 4.137198 | 4.11829 | 433 | 7 | 5.932203 |
| GO:0021766 | hippocampus development | -2.43112 | 9.718301 | 4.859696 | 79 | 3 | 2.542373 |
| GO:0021549 | cerebellum development | -2.17033 | 7.83414 | 4.244218 | 98 | 3 | 2.542373 |
| GO:0014910 | regulation of smooth muscle cell migration | -10.3481 | 27.41949 | 15.18672 | 84 | 9 | 7.627119 |
| GO:0014911 | positive regulation of smooth muscle cell migration | -6.14567 | 29.75759 | 11.81928 | 43 | 5 | 4.237288 |
| GO:0036120 | cellular response to platelet-derived growth factor stimulus | -3.9552 | 31.98941 | 9.512319 | 24 | 3 | 2.542373 |
| GO:0036119 | response to platelet-derived growth factor | -3.84891 | 29.52868 | 9.114867 | 26 | 3 | 2.542373 |
| GO:1901889 | negative regulation of cell junction assembly | -3.57583 | 23.99206 | 8.150381 | 32 | 3 | 2.542373 |
| GO:0051385 | response to mineralocorticoid | -3.42255 | 21.32627 | 7.642983 | 36 | 3 | 2.542373 |
| GO:0061098 | positive regulation of protein tyrosine kinase activity | -2.90394 | 14.21751 | 6.088779 | 54 | 3 | 2.542373 |
| GO:0061097 | regulation of protein tyrosine kinase activity | -2.2862 | 8.626357 | 4.512819 | 89 | 3 | 2.542373 |
| GO:0001655 | urogenital system development | -10.2372 | 10.72699 | 11.19597 | 334 | 14 | 11.86441 |
| GO:0072001 | renal system development | -8.67141 | 10.37494 | 10.15192 | 296 | 12 | 10.16949 |
| GO:0001822 | kidney development | -7.73615 | 9.808599 | 9.391096 | 287 | 11 | 9.322034 |
| GO:0008584 | male gonad development | -7.17818 | 15.05384 | 10.2882 | 136 | 8 | 6.779661 |
| GO:0046546 | development of primary male sexual characteristics | -7.15346 | 14.94396 | 10.24539 | 137 | 8 | 6.779661 |
| GO:0046661 | male sex differentiation | -6.6334 | 12.79576 | 9.36989 | 160 | 8 | 6.779661 |
| GO:0060978 | angiogenesis involved in coronary vascular morphogenesis | -6.23785 | 153.5492 | 21.36612 | 5 | 3 | 2.542373 |
| GO:0060977 | coronary vasculature morphogenesis | -4.26889 | 40.40767 | 10.7619 | 19 | 3 | 2.542373 |
| GO:0035265 | organ growth | -3.47384 | 12.18644 | 6.430301 | 84 | 4 | 3.389831 |
| GO:0060976 | coronary vasculature development | -3.13538 | 17.06102 | 6.75302 | 45 | 3 | 2.542373 |
| GO:0032835 | glomerulus development | -2.88081 | 13.95901 | 6.02482 | 55 | 3 | 2.542373 |
| GO:0072006 | nephron development | -2.7884 | 7.997352 | 4.968851 | 128 | 4 | 3.389831 |
| GO:0043583 | ear development | -2.78025 | 5.896665 | 4.534101 | 217 | 5 | 4.237288 |
| GO:0072028 | nephron morphogenesis | -2.63407 | 11.45889 | 5.367849 | 67 | 3 | 2.542373 |
| GO:0001656 | metanephros development | -2.40059 | 9.478343 | 4.785547 | 81 | 3 | 2.542373 |
| GO:0060993 | kidney morphogenesis | -2.35629 | 9.139831 | 4.679019 | 84 | 3 | 2.542373 |
| GO:0007565 | female pregnancy | -10.1315 | 16.55922 | 12.74187 | 170 | 11 | 9.322034 |
| GO:0044703 | multi-organism reproductive process | -9.6131 | 14.81615 | 11.96545 | 190 | 11 | 9.322034 |
| GO:0044706 | multi-multicellular organism process | -9.39884 | 14.14607 | 11.65341 | 199 | 11 | 9.322034 |
| GO:0060135 | maternal process involved in female pregnancy | -8.52835 | 30.88632 | 14.26917 | 58 | 7 | 5.932203 |
| GO:0001893 | maternal placenta development | -5.08071 | 31.02003 | 10.80688 | 33 | 4 | 3.389831 |
| GO:0046697 | decidualization | -4.01195 | 33.38025 | 9.729812 | 23 | 3 | 2.542373 |
| GO:0030324 | lung development | -10.0227 | 16.17855 | 12.57635 | 174 | 11 | 9.322034 |
| GO:0030323 | respiratory tube development | -9.9166 | 15.81499 | 12.41624 | 178 | 11 | 9.322034 |
| GO:0060541 | respiratory system development | -9.42212 | 14.21751 | 11.68707 | 198 | 11 | 9.322034 |
| GO:0048286 | lung alveolus development | -4.57431 | 23.26502 | 9.256803 | 44 | 4 | 3.389831 |
| GO:0002053 | positive regulation of mesenchymal cell proliferation | -4.01195 | 33.38025 | 9.729812 | 23 | 3 | 2.542373 |
| GO:0010464 | regulation of mesenchymal cell proliferation | -3.70483 | 26.47399 | 8.596062 | 29 | 3 | 2.542373 |
| GO:0060485 | mesenchyme development | -9.89976 | 13.2943 | 11.74822 | 231 | 12 | 10.16949 |
| GO:0048638 | regulation of developmental growth | -9.22189 | 10.11215 | 10.40861 | 329 | 13 | 11.01695 |
| GO:0048762 | mesenchymal cell differentiation | -8.8994 | 15.23305 | 11.58668 | 168 | 10 | 8.474576 |
| GO:0003007 | heart morphogenesis | -7.24974 | 10.23661 | 9.185075 | 250 | 10 | 8.474576 |
| GO:0060043 | regulation of cardiac muscle cell proliferation | -5.85691 | 26.1138 | 11.0194 | 49 | 5 | 4.237288 |
| GO:0046620 | regulation of organ growth | -5.53271 | 15.20289 | 8.954878 | 101 | 6 | 5.084746 |
| GO:0003205 | cardiac chamber development | -5.35735 | 10.72699 | 7.8947 | 167 | 7 | 5.932203 |
| GO:0048639 | positive regulation of developmental growth | -5.32328 | 10.60004 | 7.838446 | 169 | 7 | 5.932203 |
| GO:0055021 | regulation of cardiac muscle tissue growth | -5.1767 | 19.09815 | 9.28857 | 67 | 5 | 4.237288 |
| GO:0003206 | cardiac chamber morphogenesis | -4.97761 | 12.18644 | 7.880976 | 126 | 6 | 5.084746 |
| GO:0060420 | regulation of heart growth | -4.96396 | 17.29157 | 8.788333 | 74 | 5 | 4.237288 |
| GO:0001837 | epithelial to mesenchymal transition | -4.85192 | 16.40482 | 8.532191 | 78 | 5 | 4.237288 |
| GO:0046622 | positive regulation of organ growth | -4.28499 | 19.68579 | 8.446606 | 52 | 4 | 3.389831 |
| GO:0060045 | positive regulation of cardiac muscle cell proliferation | -3.66031 | 25.59153 | 8.440279 | 30 | 3 | 2.542373 |
| GO:0048705 | skeletal system morphogenesis | -3.57942 | 6.824407 | 5.492396 | 225 | 6 | 5.084746 |
| GO:0055023 | positive regulation of cardiac muscle tissue growth | -3.38707 | 20.74989 | 7.528814 | 37 | 3 | 2.542373 |
| GO:0060421 | positive regulation of heart growth | -3.25467 | 18.72551 | 7.113454 | 41 | 3 | 2.542373 |
| GO:0060412 | ventricular septum morphogenesis | -3.22372 | 18.27966 | 7.018705 | 42 | 3 | 2.542373 |
| GO:0048701 | embryonic cranial skeleton morphogenesis | -3.10733 | 16.69013 | 6.670083 | 46 | 3 | 2.542373 |
| GO:0048562 | embryonic organ morphogenesis | -2.98512 | 5.258533 | 4.579902 | 292 | 6 | 5.084746 |
| GO:0007517 | muscle organ development | -2.97749 | 5.240585 | 4.56848 | 293 | 6 | 5.084746 |
| GO:0003231 | cardiac ventricle development | -2.81349 | 8.124294 | 5.019147 | 126 | 4 | 3.389831 |
| GO:0048706 | embryonic skeletal system development | -2.80089 | 8.060323 | 4.993861 | 127 | 4 | 3.389831 |
| GO:0060411 | cardiac septum morphogenesis | -2.56231 | 10.81332 | 5.185029 | 71 | 3 | 2.542373 |
| GO:1904888 | cranial skeletal system development | -2.56231 | 10.81332 | 5.185029 | 71 | 3 | 2.542373 |
| GO:0003208 | cardiac ventricle morphogenesis | -2.54506 | 10.66314 | 5.141592 | 72 | 3 | 2.542373 |
| GO:0003281 | ventricular septum development | -2.52806 | 10.51707 | 5.098999 | 73 | 3 | 2.542373 |
| GO:0048704 | embryonic skeletal system morphogenesis | -2.22031 | 8.167508 | 4.359172 | 94 | 3 | 2.542373 |
| GO:0003279 | cardiac septum development | -2.07684 | 7.242885 | 4.032707 | 106 | 3 | 2.542373 |
| GO:0042391 | regulation of membrane potential | -9.88096 | 9.011101 | 10.42982 | 426 | 15 | 12.71186 |
| GO:0051881 | regulation of mitochondrial membrane potential | -7.9008 | 25.23108 | 12.80289 | 71 | 7 | 5.932203 |
| GO:2000811 | negative regulation of anoikis | -6.18726 | 56.87006 | 14.85045 | 18 | 4 | 3.389831 |
| GO:0007276 | gamete generation | -5.91343 | 4.848192 | 6.63367 | 739 | 14 | 11.86441 |
| GO:2000209 | regulation of anoikis | -5.58007 | 40.94644 | 12.51477 | 25 | 4 | 3.389831 |
| GO:0051900 | regulation of mitochondrial depolarization | -4.26889 | 40.40767 | 10.7619 | 19 | 3 | 2.542373 |
| GO:0022412 | cellular process involved in reproduction in multicellular organism | -3.72534 | 5.092841 | 5.174196 | 402 | 8 | 6.779661 |
| GO:0003254 | regulation of membrane depolarization | -3.07991 | 16.33502 | 6.58971 | 47 | 3 | 2.542373 |
| GO:0007281 | germ cell development | -2.95482 | 5.187471 | 4.534523 | 296 | 6 | 5.084746 |
| GO:0032102 | negative regulation of response to external stimulus | -9.85274 | 8.968993 | 10.39968 | 428 | 15 | 12.71186 |
| GO:0038093 | Fc receptor signaling pathway | -8.99577 | 35.82814 | 15.43725 | 50 | 7 | 5.932203 |
| GO:0006909 | phagocytosis | -8.65583 | 12.0302 | 10.60903 | 234 | 11 | 9.322034 |
| GO:0007229 | integrin-mediated signaling pathway | -8.48144 | 22.01422 | 12.71216 | 93 | 8 | 6.779661 |
| GO:0034103 | regulation of tissue remodeling | -7.31534 | 20.83031 | 11.53435 | 86 | 7 | 5.932203 |
| GO:0050728 | negative regulation of inflammatory response | -6.18925 | 11.18755 | 8.657853 | 183 | 8 | 6.779661 |
| GO:0002861 | regulation of inflammatory response to antigenic stimulus | -6.04483 | 28.43503 | 11.53534 | 45 | 5 | 4.237288 |
| GO:0002433 | immune response-regulating cell surface receptor signaling pathway involved in phagocytosis | -5.89985 | 48.74576 | 13.70852 | 21 | 4 | 3.389831 |
| GO:0038096 | Fc-gamma receptor signaling pathway involved in phagocytosis | -5.89985 | 48.74576 | 13.70852 | 21 | 4 | 3.389831 |
| GO:0002431 | Fc receptor mediated stimulatory signaling pathway | -5.65448 | 42.65254 | 12.78541 | 24 | 4 | 3.389831 |
| GO:0038094 | Fc-gamma receptor signaling pathway | -5.37487 | 36.55932 | 11.79041 | 28 | 4 | 3.389831 |
| GO:0031348 | negative regulation of defense response | -4.94989 | 7.610863 | 6.821379 | 269 | 8 | 6.779661 |
| GO:0045124 | regulation of bone resorption | -4.69764 | 24.96734 | 9.618375 | 41 | 4 | 3.389831 |
| GO:0046850 | regulation of bone remodeling | -4.38751 | 20.89104 | 8.727766 | 49 | 4 | 3.389831 |
| GO:0050777 | negative regulation of immune response | -4.06697 | 8.390664 | 6.280928 | 183 | 6 | 5.084746 |
| GO:0002862 | negative regulation of inflammatory response to antigenic stimulus | -3.61734 | 24.76599 | 8.291913 | 31 | 3 | 2.542373 |
| GO:0031333 | negative regulation of protein-containing complex assembly | -2.65779 | 7.364468 | 4.710491 | 139 | 4 | 3.389831 |
| GO:0046626 | regulation of insulin receptor signaling pathway | -2.61571 | 11.29038 | 5.320718 | 68 | 3 | 2.542373 |
| GO:0070301 | cellular response to hydrogen peroxide | -2.61571 | 11.29038 | 5.320718 | 68 | 3 | 2.542373 |
| GO:0051129 | negative regulation of cellular component organization | -9.63515 | 6.647149 | 9.419592 | 693 | 18 | 15.25424 |
| GO:0010639 | negative regulation of organelle organization | -4.20827 | 5.986322 | 5.808467 | 342 | 8 | 6.779661 |
| GO:0051497 | negative regulation of stress fiber assembly | -3.53567 | 23.26502 | 8.015165 | 33 | 3 | 2.542373 |
| GO:0032232 | negative regulation of actin filament bundle assembly | -3.42255 | 21.32627 | 7.642983 | 36 | 3 | 2.542373 |
| GO:1902904 | negative regulation of supramolecular fiber organization | -3.33601 | 7.850161 | 5.492433 | 163 | 5 | 4.237288 |
| GO:0051494 | negative regulation of cytoskeleton organization | -2.44774 | 6.43812 | 4.306144 | 159 | 4 | 3.389831 |
| GO:0043086 | negative regulation of catalytic activity | -9.63274 | 6.186247 | 9.227544 | 786 | 19 | 16.10169 |
| GO:2001237 | negative regulation of extrinsic apoptotic signaling pathway | -8.33507 | 21.10641 | 12.42264 | 97 | 8 | 6.779661 |
| GO:2001236 | regulation of extrinsic apoptotic signaling pathway | -8.01331 | 15.05384 | 10.91537 | 153 | 9 | 7.627119 |
| GO:0045861 | negative regulation of proteolysis | -6.8372 | 7.997352 | 8.27077 | 352 | 11 | 9.322034 |
| GO:0051346 | negative regulation of hydrolase activity | -5.68057 | 6.897985 | 7.159288 | 371 | 10 | 8.474576 |
| GO:1902042 | negative regulation of extrinsic apoptotic signaling pathway via death domain receptors | -5.1922 | 33.02132 | 11.17218 | 31 | 4 | 3.389831 |
| GO:0010466 | negative regulation of peptidase activity | -5.0329 | 7.814206 | 6.938299 | 262 | 8 | 6.779661 |
| GO:0043154 | negative regulation of cysteine-type endopeptidase activity involved in apoptotic process | -4.87934 | 16.61787 | 8.59442 | 77 | 5 | 4.237288 |
| GO:0048011 | neurotrophin TRK receptor signaling pathway | -4.79141 | 59.05737 | 13.11346 | 13 | 3 | 2.542373 |
| GO:2000117 | negative regulation of cysteine-type endopeptidase activity | -4.66998 | 15.05384 | 8.126647 | 85 | 5 | 4.237288 |
| GO:1902041 | regulation of extrinsic apoptotic signaling pathway via death domain receptors | -4.35261 | 20.47322 | 8.631326 | 50 | 4 | 3.389831 |
| GO:0010951 | negative regulation of endopeptidase activity | -4.21691 | 7.137079 | 6.115133 | 251 | 7 | 5.932203 |
| GO:0038179 | neurotrophin signaling pathway | -3.84891 | 29.52868 | 9.114867 | 26 | 3 | 2.542373 |
| GO:0062013 | positive regulation of small molecule metabolic process | -9.4092 | 17.17552 | 12.39711 | 149 | 10 | 8.474576 |
| GO:0062012 | regulation of small molecule metabolic process | -8.97147 | 9.643183 | 10.11284 | 345 | 13 | 11.01695 |
| GO:0032147 | activation of protein kinase activity | -8.46297 | 16.93557 | 11.66573 | 136 | 9 | 7.627119 |
| GO:0045913 | positive regulation of carbohydrate metabolic process | -7.57358 | 22.67604 | 12.08251 | 79 | 7 | 5.932203 |
| GO:0043467 | regulation of generation of precursor metabolites and energy | -7.17818 | 15.05384 | 10.2882 | 136 | 8 | 6.779661 |
| GO:0006109 | regulation of carbohydrate metabolic process | -6.15355 | 11.06661 | 8.601975 | 185 | 8 | 6.779661 |
| GO:0045981 | positive regulation of nucleotide metabolic process | -5.94872 | 27.22503 | 11.26933 | 47 | 5 | 4.237288 |
| GO:1900544 | positive regulation of purine nucleotide metabolic process | -5.94872 | 27.22503 | 11.26933 | 47 | 5 | 4.237288 |
| GO:1900542 | regulation of purine nucleotide metabolic process | -5.85481 | 17.25271 | 9.617379 | 89 | 6 | 5.084746 |
| GO:0006140 | regulation of nucleotide metabolic process | -5.79798 | 16.87353 | 9.498271 | 91 | 6 | 5.084746 |
| GO:0032148 | activation of protein kinase B activity | -5.1922 | 33.02132 | 11.17218 | 31 | 4 | 3.389831 |
| GO:1903578 | regulation of ATP metabolic process | -4.52648 | 14.06128 | 7.815497 | 91 | 5 | 4.237288 |
| GO:0010675 | regulation of cellular carbohydrate metabolic process | -4.49945 | 10.03589 | 7.018021 | 153 | 6 | 5.084746 |
| GO:0006110 | regulation of glycolytic process | -4.45967 | 21.78002 | 8.929519 | 47 | 4 | 3.389831 |
| GO:0043470 | regulation of carbohydrate catabolic process | -4.12744 | 17.95897 | 8.026791 | 57 | 4 | 3.389831 |
| GO:0045821 | positive regulation of glycolytic process | -4.07141 | 34.89753 | 9.96168 | 22 | 3 | 2.542373 |
| GO:1903580 | positive regulation of ATP metabolic process | -3.31906 | 19.68579 | 7.313399 | 39 | 3 | 2.542373 |
| GO:0050730 | regulation of peptidyl-tyrosine phosphorylation | -9.34842 | 11.90304 | 11.01578 | 258 | 12 | 10.16949 |
| GO:0050731 | positive regulation of peptidyl-tyrosine phosphorylation | -8.42638 | 13.61251 | 10.86505 | 188 | 10 | 8.474576 |
| GO:1904892 | regulation of receptor signaling pathway via STAT | -5.91303 | 17.64933 | 9.740421 | 87 | 6 | 5.084746 |
| GO:0046425 | regulation of receptor signaling pathway via JAK-STAT | -4.90715 | 16.83653 | 8.657827 | 76 | 5 | 4.237288 |
| GO:0046427 | positive regulation of receptor signaling pathway via JAK-STAT | -4.83105 | 26.93845 | 10.02084 | 38 | 4 | 3.389831 |
| GO:1904894 | positive regulation of receptor signaling pathway via STAT | -4.65549 | 24.37288 | 9.493668 | 42 | 4 | 3.389831 |
| GO:0042531 | positive regulation of tyrosine phosphorylation of STAT protein | -3.85261 | 15.27852 | 7.32821 | 67 | 4 | 3.389831 |
| GO:0042509 | regulation of tyrosine phosphorylation of STAT protein | -3.51387 | 12.48367 | 6.521883 | 82 | 4 | 3.389831 |
| GO:0051702 | biological process involved in interaction with symbiont | -3.18669 | 10.23661 | 5.794658 | 100 | 4 | 3.389831 |
| GO:0042593 | glucose homeostasis | -9.30698 | 13.86733 | 11.52115 | 203 | 11 | 9.322034 |
| GO:0033500 | carbohydrate homeostasis | -9.28432 | 13.79935 | 11.48867 | 204 | 11 | 9.322034 |
| GO:0048545 | response to steroid hormone | -7.91068 | 10.19952 | 9.61631 | 276 | 11 | 9.322034 |
| GO:0071383 | cellular response to steroid hormone stimulus | -6.93939 | 14.02275 | 9.879309 | 146 | 8 | 6.779661 |
| GO:0031960 | response to corticosteroid | -6.61267 | 12.71629 | 9.335952 | 161 | 8 | 6.779661 |
| GO:0051384 | response to glucocorticoid | -5.88754 | 12.88782 | 8.798452 | 139 | 7 | 5.932203 |
| GO:1901655 | cellular response to ketone | -5.6092 | 15.66828 | 9.109468 | 98 | 6 | 5.084746 |
| GO:0034284 | response to monosaccharide | -5.5347 | 11.41023 | 8.191004 | 157 | 7 | 5.932203 |
| GO:0009743 | response to carbohydrate | -5.09661 | 9.789108 | 7.46939 | 183 | 7 | 5.932203 |
| GO:1901654 | response to ketone | -4.93158 | 9.234056 | 7.206246 | 194 | 7 | 5.932203 |
| GO:0009746 | response to hexose | -4.56415 | 10.30531 | 7.1317 | 149 | 6 | 5.084746 |
| GO:0097306 | cellular response to alcohol | -4.43639 | 13.46922 | 7.623955 | 95 | 5 | 4.237288 |
| GO:0001678 | cellular glucose homeostasis | -4.20842 | 12.07147 | 7.151824 | 106 | 5 | 4.237288 |
| GO:0009749 | response to glucose | -3.5693 | 8.824664 | 5.915477 | 145 | 5 | 4.237288 |
| GO:0071548 | response to dexamethasone | -3.25467 | 18.72551 | 7.113454 | 41 | 3 | 2.542373 |
| GO:0071384 | cellular response to corticosteroid stimulus | -2.71062 | 12.18644 | 5.566864 | 63 | 3 | 2.542373 |
| GO:0071333 | cellular response to glucose stimulus | -2.40059 | 9.478343 | 4.785547 | 81 | 3 | 2.542373 |
| GO:0071331 | cellular response to hexose stimulus | -2.37086 | 9.249949 | 4.713927 | 83 | 3 | 2.542373 |
| GO:0071326 | cellular response to monosaccharide stimulus | -2.34191 | 9.032303 | 4.644688 | 85 | 3 | 2.542373 |
| GO:0071322 | cellular response to carbohydrate stimulus | -2.19503 | 7.997352 | 4.300863 | 96 | 3 | 2.542373 |
| GO:0032368 | regulation of lipid transport | -9.29623 | 16.72649 | 12.21449 | 153 | 10 | 8.474576 |
| GO:1905952 | regulation of lipid localization | -8.53932 | 13.98444 | 11.03478 | 183 | 10 | 8.474576 |
| GO:2000191 | regulation of fatty acid transport | -6.74021 | 38.77504 | 13.5986 | 33 | 5 | 4.237288 |
| GO:0032890 | regulation of organic acid transport | -6.43824 | 21.62664 | 10.89842 | 71 | 6 | 5.084746 |
| GO:0044070 | regulation of anion transport | -4.54967 | 14.21751 | 7.865278 | 90 | 5 | 4.237288 |
| GO:1903793 | positive regulation of anion transport | -4.38751 | 20.89104 | 8.727766 | 49 | 4 | 3.389831 |
| GO:1905954 | positive regulation of lipid localization | -4.09468 | 11.42479 | 6.92274 | 112 | 5 | 4.237288 |
| GO:0032303 | regulation of icosanoid secretion | -4.07141 | 34.89753 | 9.96168 | 22 | 3 | 2.542373 |
| GO:0032370 | positive regulation of lipid transport | -3.41569 | 11.76622 | 6.298603 | 87 | 4 | 3.389831 |
| GO:0032892 | positive regulation of organic acid transport | -3.13538 | 17.06102 | 6.75302 | 45 | 3 | 2.542373 |
| GO:0036336 | dendritic cell migration | -9.2825 | 61.41966 | 18.9288 | 25 | 6 | 5.084746 |
| GO:0002407 | dendritic cell chemotaxis | -8.16237 | 71.08757 | 18.62952 | 18 | 5 | 4.237288 |
| GO:0071677 | positive regulation of mononuclear cell migration | -8.12621 | 27.14253 | 13.31648 | 66 | 7 | 5.932203 |
| GO:0071674 | mononuclear cell migration | -7.90082 | 18.61202 | 11.59025 | 110 | 8 | 6.779661 |
| GO:2000406 | positive regulation of T cell migration | -6.88264 | 41.27665 | 14.05245 | 31 | 5 | 4.237288 |
| GO:2000401 | regulation of lymphocyte migration | -6.70967 | 23.99206 | 11.5325 | 64 | 6 | 5.084746 |
| GO:2000403 | positive regulation of lymphocyte migration | -6.4816 | 34.58314 | 12.80216 | 37 | 5 | 4.237288 |
| GO:2000404 | regulation of T cell migration | -6.04483 | 28.43503 | 11.53534 | 45 | 5 | 4.237288 |
| GO:0090026 | positive regulation of monocyte chemotaxis | -5.99031 | 51.18305 | 14.06083 | 20 | 4 | 3.389831 |
| GO:0090025 | regulation of monocyte chemotaxis | -5.37487 | 36.55932 | 11.79041 | 28 | 4 | 3.389831 |
| GO:1990868 | response to chemokine | -4.54967 | 14.21751 | 7.865278 | 90 | 5 | 4.237288 |
| GO:1990869 | cellular response to chemokine | -4.54967 | 14.21751 | 7.865278 | 90 | 5 | 4.237288 |
| GO:0010820 | positive regulation of T cell chemotaxis | -4.50331 | 47.98411 | 11.77392 | 16 | 3 | 2.542373 |
| GO:0010819 | regulation of T cell chemotaxis | -4.42023 | 45.16152 | 11.40737 | 17 | 3 | 2.542373 |
| GO:0140131 | positive regulation of lymphocyte chemotaxis | -4.19955 | 38.38729 | 10.47557 | 20 | 3 | 2.542373 |
| GO:1901623 | regulation of lymphocyte chemotaxis | -3.84891 | 29.52868 | 9.114867 | 26 | 3 | 2.542373 |
| GO:0072678 | T cell migration | -3.70483 | 26.47399 | 8.596062 | 29 | 3 | 2.542373 |
| GO:0072676 | lymphocyte migration | -3.66281 | 13.64881 | 6.869345 | 75 | 4 | 3.389831 |
| GO:0070098 | chemokine-mediated signaling pathway | -3.51387 | 12.48367 | 6.521883 | 82 | 4 | 3.389831 |
| GO:0002548 | monocyte chemotaxis | -3.13538 | 17.06102 | 6.75302 | 45 | 3 | 2.542373 |
| GO:0048247 | lymphocyte chemotaxis | -3.02691 | 15.66828 | 6.43613 | 49 | 3 | 2.542373 |
| GO:0006968 | cellular defense response | -2.9516 | 14.76434 | 6.221946 | 52 | 3 | 2.542373 |
| GO:0046677 | response to antibiotic | -9.26112 | 38.94363 | 16.13035 | 46 | 7 | 5.932203 |
| GO:0033628 | regulation of cell adhesion mediated by integrin | -9.12542 | 37.32097 | 15.77315 | 48 | 7 | 5.932203 |
| GO:0060326 | cell chemotaxis | -8.02529 | 12.36306 | 10.27469 | 207 | 10 | 8.474576 |
| GO:0030595 | leukocyte chemotaxis | -6.96245 | 14.11946 | 9.918366 | 145 | 8 | 6.779661 |
| GO:0097529 | myeloid leukocyte migration | -4.99742 | 12.28393 | 7.91792 | 125 | 6 | 5.084746 |
| GO:0030593 | neutrophil chemotaxis | -3.57595 | 12.95773 | 6.665399 | 79 | 4 | 3.389831 |
| GO:0071621 | granulocyte chemotaxis | -3.47384 | 12.18644 | 6.430301 | 84 | 4 | 3.389831 |
| GO:1990266 | neutrophil migration | -3.37812 | 11.50181 | 6.214339 | 89 | 4 | 3.389831 |
| GO:0097530 | granulocyte migration | -3.23653 | 10.55321 | 5.902399 | 97 | 4 | 3.389831 |
| GO:0050792 | regulation of viral process | -2.44774 | 6.43812 | 4.306144 | 159 | 4 | 3.389831 |
| GO:0045069 | regulation of viral genome replication | -2.3137 | 8.824664 | 4.577694 | 87 | 3 | 2.542373 |
| GO:0048525 | negative regulation of viral process | -2.25936 | 8.436767 | 4.44995 | 91 | 3 | 2.542373 |
| GO:0010506 | regulation of autophagy | -9.06383 | 9.813859 | 10.22145 | 339 | 13 | 11.01695 |
| GO:0016241 | regulation of macroautophagy | -7.89133 | 14.57745 | 10.71719 | 158 | 9 | 7.627119 |
| GO:0031331 | positive regulation of cellular catabolic process | -6.67238 | 6.824407 | 7.79674 | 450 | 12 | 10.16949 |
| GO:0009896 | positive regulation of catabolic process | -6.06194 | 5.974675 | 7.124741 | 514 | 12 | 10.16949 |
| GO:0016239 | positive regulation of macroautophagy | -3.70814 | 14.02275 | 6.977257 | 73 | 4 | 3.389831 |
| GO:0010508 | positive regulation of autophagy | -3.66889 | 9.272292 | 6.100352 | 138 | 5 | 4.237288 |
| GO:0035094 | response to nicotine | -9.05987 | 36.55932 | 15.60267 | 49 | 7 | 5.932203 |
| GO:0051354 | negative regulation of oxidoreductase activity | -3.45911 | 21.93559 | 7.761864 | 35 | 3 | 2.542373 |
| GO:0062014 | negative regulation of small molecule metabolic process | -3.15437 | 10.03589 | 5.725333 | 102 | 4 | 3.389831 |
| GO:0043331 | response to dsRNA | -2.85813 | 13.70975 | 5.962506 | 56 | 3 | 2.542373 |
| GO:0019932 | second-messenger-mediated signaling | -9.00034 | 12.97266 | 11.08617 | 217 | 11 | 9.322034 |
| GO:0019722 | calcium-mediated signaling | -8.21779 | 15.8844 | 11.25266 | 145 | 9 | 7.627119 |
| GO:0006816 | calcium ion transport | -4.3741 | 7.558678 | 6.348869 | 237 | 7 | 5.932203 |
| GO:0030001 | metal ion transport | -3.80941 | 4.161224 | 4.960845 | 615 | 10 | 8.474576 |
| GO:0097553 | calcium ion transmembrane import into cytosol | -2.34191 | 9.032303 | 4.644688 | 85 | 3 | 2.542373 |
| GO:0032355 | response to estradiol | -8.85002 | 18.72551 | 12.33765 | 123 | 9 | 7.627119 |
| GO:0043200 | response to amino acid | -7.66032 | 17.35019 | 11.14574 | 118 | 8 | 6.779661 |
| GO:0001101 | response to acid chemical | -7.25356 | 15.3934 | 10.4194 | 133 | 8 | 6.779661 |
| GO:0071392 | cellular response to estradiol stimulus | -4.74092 | 25.59153 | 9.747611 | 40 | 4 | 3.389831 |
| GO:0071230 | cellular response to amino acid stimulus | -3.57595 | 12.95773 | 6.665399 | 79 | 4 | 3.389831 |
| GO:0071229 | cellular response to acid chemical | -3.37812 | 11.50181 | 6.214339 | 89 | 4 | 3.389831 |
| GO:1905475 | regulation of protein localization to membrane | -8.80006 | 14.87879 | 11.43276 | 172 | 10 | 8.474576 |
| GO:0038127 | ERBB signaling pathway | -8.4749 | 30.36283 | 14.13981 | 59 | 7 | 5.932203 |
| GO:1905477 | positive regulation of protein localization to membrane | -8.1273 | 19.87691 | 12.0195 | 103 | 8 | 6.779661 |
| GO:1904375 | regulation of protein localization to cell periphery | -7.49124 | 16.51066 | 10.84001 | 124 | 8 | 6.779661 |
| GO:0007173 | epidermal growth factor receptor signaling pathway | -5.9023 | 26.65784 | 11.14246 | 48 | 5 | 4.237288 |
| GO:1903076 | regulation of protein localization to plasma membrane | -5.48307 | 14.90768 | 8.855442 | 103 | 6 | 5.084746 |
| GO:0070849 | response to epidermal growth factor | -4.45967 | 21.78002 | 8.929519 | 47 | 4 | 3.389831 |
| GO:1903078 | positive regulation of protein localization to plasma membrane | -4.03987 | 17.06102 | 7.799656 | 60 | 4 | 3.389831 |
| GO:1904377 | positive regulation of protein localization to cell periphery | -3.85261 | 15.27852 | 7.32821 | 67 | 4 | 3.389831 |
| GO:0031295 | T cell costimulation | -3.25467 | 18.72551 | 7.113454 | 41 | 3 | 2.542373 |
| GO:0031294 | lymphocyte costimulation | -3.19355 | 17.85455 | 6.927169 | 43 | 3 | 2.542373 |
| GO:0071364 | cellular response to epidermal growth factor stimulus | -3.19355 | 17.85455 | 6.927169 | 43 | 3 | 2.542373 |
| GO:0045737 | positive regulation of cyclin-dependent protein serine/threonine kinase activity | -3.07991 | 16.33502 | 6.58971 | 47 | 3 | 2.542373 |
| GO:1904031 | positive regulation of cyclin-dependent protein kinase activity | -2.97618 | 15.05384 | 6.291323 | 51 | 3 | 2.542373 |
| GO:0000079 | regulation of cyclin-dependent protein serine/threonine kinase activity | -2.974 | 8.979483 | 5.346177 | 114 | 4 | 3.389831 |
| GO:0002686 | negative regulation of leukocyte migration | -2.9516 | 14.76434 | 6.221946 | 52 | 3 | 2.542373 |
| GO:1904029 | regulation of cyclin-dependent protein kinase activity | -2.93217 | 8.749239 | 5.26005 | 117 | 4 | 3.389831 |
| GO:0002252 | immune effector process | -8.75756 | 8.255331 | 9.535433 | 434 | 14 | 11.86441 |
| GO:0002250 | adaptive immune response | -5.93685 | 5.289186 | 6.808727 | 629 | 13 | 11.01695 |
| GO:0002366 | leukocyte activation involved in immune response | -5.14353 | 9.95226 | 7.545049 | 180 | 7 | 5.932203 |
| GO:0002263 | cell activation involved in immune response | -5.08116 | 9.735906 | 7.444558 | 184 | 7 | 5.932203 |
| GO:0002460 | adaptive immune response based on somatic recombination of immune receptors built from immunoglobulin superfamily domains | -4.33955 | 7.464195 | 6.297202 | 240 | 7 | 5.932203 |
| GO:0042088 | T-helper 1 type immune response | -4.19955 | 38.38729 | 10.47557 | 20 | 3 | 2.542373 |
| GO:1990776 | response to angiotensin | -8.67196 | 49.53198 | 16.93272 | 31 | 6 | 5.084746 |
| GO:0009615 | response to virus | -7.75083 | 8.578165 | 9.034209 | 358 | 12 | 10.16949 |
| GO:0070555 | response to interleukin-1 | -6.03846 | 13.57126 | 9.065924 | 132 | 7 | 5.932203 |
| GO:0098586 | cellular response to virus | -5.74248 | 16.51066 | 9.382887 | 93 | 6 | 5.084746 |
| GO:1904385 | cellular response to angiotensin | -5.58007 | 40.94644 | 12.51477 | 25 | 4 | 3.389831 |
| GO:0046885 | regulation of hormone biosynthetic process | -4.07141 | 34.89753 | 9.96168 | 22 | 3 | 2.542373 |
| GO:0032350 | regulation of hormone metabolic process | -3.42255 | 21.32627 | 7.642983 | 36 | 3 | 2.542373 |
| GO:0071347 | cellular response to interleukin-1 | -3.15437 | 10.03589 | 5.725333 | 102 | 4 | 3.389831 |
| GO:0034446 | substrate adhesion-dependent cell spreading | -8.63832 | 31.98941 | 14.53802 | 56 | 7 | 5.932203 |
| GO:0031589 | cell-substrate adhesion | -8.40419 | 13.54049 | 10.83187 | 189 | 10 | 8.474576 |
| GO:0007160 | cell-matrix adhesion | -7.25356 | 15.3934 | 10.4194 | 133 | 8 | 6.779661 |
| GO:0007498 | mesoderm development | -3.88597 | 10.31916 | 6.512926 | 124 | 5 | 4.237288 |
| GO:0048333 | mesodermal cell differentiation | -3.84891 | 29.52868 | 9.114867 | 26 | 3 | 2.542373 |
| GO:0034113 | heterotypic cell-cell adhesion | -3.42255 | 21.32627 | 7.642983 | 36 | 3 | 2.542373 |
| GO:0033627 | cell adhesion mediated by integrin | -3.25467 | 18.72551 | 7.113454 | 41 | 3 | 2.542373 |
| GO:0043277 | apoptotic cell clearance | -3.16411 | 17.44877 | 6.838663 | 44 | 3 | 2.542373 |
| GO:0050919 | negative chemotaxis | -3.10733 | 16.69013 | 6.670083 | 46 | 3 | 2.542373 |
| GO:0001707 | mesoderm formation | -2.61571 | 11.29038 | 5.320718 | 68 | 3 | 2.542373 |
| GO:0048332 | mesoderm morphogenesis | -2.57983 | 10.9678 | 5.229342 | 70 | 3 | 2.542373 |
| GO:0032963 | collagen metabolic process | -8.52835 | 30.88632 | 14.26917 | 58 | 7 | 5.932203 |
| GO:0030574 | collagen catabolic process | -8.10766 | 40.40767 | 15.22442 | 38 | 6 | 5.084746 |
| GO:0048598 | embryonic morphogenesis | -8.09784 | 6.66446 | 8.596992 | 576 | 15 | 12.71186 |
| GO:0001704 | formation of primary germ layer | -6.47033 | 15.71409 | 9.858303 | 114 | 7 | 5.932203 |
| GO:0150077 | regulation of neuroinflammatory response | -6.25169 | 31.20918 | 12.1233 | 41 | 5 | 4.237288 |
| GO:0022617 | extracellular matrix disassembly | -5.99621 | 27.81688 | 11.40021 | 46 | 5 | 4.237288 |
| GO:0022411 | cellular component disassembly | -5.58503 | 7.781207 | 7.343223 | 296 | 9 | 7.627119 |
| GO:0007369 | gastrulation | -5.46231 | 11.12675 | 8.069354 | 161 | 7 | 5.932203 |
| GO:0030198 | extracellular matrix organization | -4.92662 | 7.554694 | 6.788744 | 271 | 8 | 6.779661 |
| GO:0043062 | extracellular structure organization | -4.91506 | 7.526919 | 6.772552 | 272 | 8 | 6.779661 |
| GO:0045229 | external encapsulating structure organization | -4.89208 | 7.471978 | 6.740413 | 274 | 8 | 6.779661 |
| GO:0035987 | endodermal cell differentiation | -4.69764 | 24.96734 | 9.618375 | 41 | 4 | 3.389831 |
| GO:0048013 | ephrin receptor signaling pathway | -4.35261 | 20.47322 | 8.631326 | 50 | 4 | 3.389831 |
| GO:0001706 | endoderm formation | -4.31844 | 20.07178 | 8.53765 | 51 | 4 | 3.389831 |
| GO:0007492 | endoderm development | -3.68531 | 13.83326 | 6.922778 | 74 | 4 | 3.389831 |
| GO:0007566 | embryo implantation | -3.25467 | 18.72551 | 7.113454 | 41 | 3 | 2.542373 |
| GO:1904707 | positive regulation of vascular associated smooth muscle cell proliferation | -3.07991 | 16.33502 | 6.58971 | 47 | 3 | 2.542373 |
| GO:0016485 | protein processing | -8.42638 | 13.61251 | 10.86505 | 188 | 10 | 8.474576 |
| GO:0051604 | protein maturation | -7.13753 | 9.957792 | 9.032716 | 257 | 10 | 8.474576 |
| GO:0140448 | signaling receptor ligand precursor processing | -6.4816 | 34.58314 | 12.80216 | 37 | 5 | 4.237288 |
| GO:0001990 | regulation of systemic arterial blood pressure by hormone | -4.97627 | 29.24746 | 10.47273 | 35 | 4 | 3.389831 |
| GO:0050886 | endocrine process | -4.38751 | 20.89104 | 8.727766 | 49 | 4 | 3.389831 |
| GO:0050435 | amyloid-beta metabolic process | -4.26889 | 40.40767 | 10.7619 | 19 | 3 | 2.542373 |
| GO:0003081 | regulation of systemic arterial blood pressure by renin-angiotensin | -4.13384 | 36.55932 | 10.20961 | 21 | 3 | 2.542373 |
| GO:0016486 | peptide hormone processing | -3.45911 | 21.93559 | 7.761864 | 35 | 3 | 2.542373 |
| GO:0007631 | feeding behavior | -2.2727 | 8.530508 | 4.481141 | 90 | 3 | 2.542373 |
| GO:0035306 | positive regulation of dephosphorylation | -8.37089 | 29.36732 | 13.89048 | 61 | 7 | 5.932203 |
| GO:0035303 | regulation of dephosphorylation | -6.08318 | 13.78005 | 9.146102 | 130 | 7 | 5.932203 |
| GO:0035307 | positive regulation of protein dephosphorylation | -5.99621 | 27.81688 | 11.40021 | 46 | 5 | 4.237288 |
| GO:0035304 | regulation of protein dephosphorylation | -5.79798 | 16.87353 | 9.498271 | 91 | 6 | 5.084746 |
| GO:0010922 | positive regulation of phosphatase activity | -4.92643 | 28.43503 | 10.31598 | 36 | 4 | 3.389831 |
| GO:0032516 | positive regulation of phosphoprotein phosphatase activity | -4.07141 | 34.89753 | 9.96168 | 22 | 3 | 2.542373 |
| GO:0043666 | regulation of phosphoprotein phosphatase activity | -4.06853 | 17.35019 | 7.873508 | 59 | 4 | 3.389831 |
| GO:0010921 | regulation of phosphatase activity | -3.47384 | 12.18644 | 6.430301 | 84 | 4 | 3.389831 |
| GO:0003179 | heart valve morphogenesis | -2.88081 | 13.95901 | 6.02482 | 55 | 3 | 2.542373 |
| GO:0003170 | heart valve development | -2.67171 | 11.81147 | 5.465179 | 65 | 3 | 2.542373 |
| GO:0120162 | positive regulation of cold-induced thermogenesis | -8.29949 | 20.89104 | 12.35297 | 98 | 8 | 6.779661 |
| GO:0120161 | regulation of cold-induced thermogenesis | -8.16554 | 15.66828 | 11.16587 | 147 | 9 | 7.627119 |
| GO:0051051 | negative regulation of transport | -8.27001 | 7.558678 | 9.01438 | 474 | 14 | 11.86441 |
| GO:0043271 | negative regulation of ion transport | -4.37547 | 9.537214 | 6.802755 | 161 | 6 | 5.084746 |
| GO:0051926 | negative regulation of calcium ion transport | -3.73131 | 14.21751 | 7.032816 | 72 | 4 | 3.389831 |
| GO:0048873 | homeostasis of number of cells within a tissue | -3.70483 | 26.47399 | 8.596062 | 29 | 3 | 2.542373 |
| GO:0001974 | blood vessel remodeling | -3.49679 | 22.58076 | 7.885798 | 34 | 3 | 2.542373 |
| GO:0034763 | negative regulation of transmembrane transport | -3.46184 | 8.363244 | 5.718903 | 153 | 5 | 4.237288 |
| GO:0032872 | regulation of stress-activated MAPK cascade | -8.21003 | 12.92501 | 10.54423 | 198 | 10 | 8.474576 |
| GO:0070302 | regulation of stress-activated protein kinase signaling cascade | -8.14745 | 12.7321 | 10.45247 | 201 | 10 | 8.474576 |
| GO:0043030 | regulation of macrophage activation | -5.34384 | 20.63833 | 9.694859 | 62 | 5 | 4.237288 |
| GO:1901224 | positive regulation of NIK/NF-kappaB signaling | -5.1767 | 19.09815 | 9.28857 | 67 | 5 | 4.237288 |
| GO:0046328 | regulation of JNK cascade | -4.68213 | 10.81332 | 7.341394 | 142 | 6 | 5.084746 |
| GO:1901222 | regulation of NIK/NF-kappaB signaling | -4.13184 | 11.63251 | 6.997123 | 110 | 5 | 4.237288 |
| GO:0032874 | positive regulation of stress-activated MAPK cascade | -3.75881 | 9.69376 | 6.269613 | 132 | 5 | 4.237288 |
| GO:0070304 | positive regulation of stress-activated protein kinase signaling cascade | -3.72834 | 9.549077 | 6.212011 | 134 | 5 | 4.237288 |
| GO:0043032 | positive regulation of macrophage activation | -3.66031 | 25.59153 | 8.440279 | 30 | 3 | 2.542373 |
| GO:0046330 | positive regulation of JNK cascade | -3.25351 | 10.66314 | 5.939365 | 96 | 4 | 3.389831 |
| GO:0009895 | negative regulation of catabolic process | -8.17199 | 9.362753 | 9.537896 | 328 | 12 | 10.16949 |
| GO:0045058 | T cell selection | -7.83439 | 36.55932 | 14.44359 | 42 | 6 | 5.084746 |
| GO:0046632 | alpha-beta T cell differentiation | -6.96911 | 26.47399 | 12.16251 | 58 | 6 | 5.084746 |
| GO:0030217 | T cell differentiation | -6.78258 | 13.38119 | 9.616255 | 153 | 8 | 6.779661 |
| GO:0002363 | alpha-beta T cell lineage commitment | -6.29509 | 60.21535 | 15.29593 | 17 | 4 | 3.389831 |
| GO:0046631 | alpha-beta T cell activation | -6.19421 | 19.68579 | 10.3494 | 78 | 6 | 5.084746 |
| GO:0031330 | negative regulation of cellular catabolic process | -5.92619 | 8.56222 | 7.803031 | 269 | 9 | 7.627119 |
| GO:0002360 | T cell lineage commitment | -5.73235 | 44.507 | 13.07325 | 23 | 4 | 3.389831 |
| GO:0043368 | positive T cell selection | -5.31173 | 35.29866 | 11.5739 | 29 | 4 | 3.389831 |
| GO:0010507 | negative regulation of autophagy | -4.62096 | 14.70777 | 8.019512 | 87 | 5 | 4.237288 |
| GO:0043369 | CD4-positive or CD8-positive, alpha-beta T cell lineage commitment | -4.42023 | 45.16152 | 11.40737 | 17 | 3 | 2.542373 |
| GO:0051149 | positive regulation of muscle cell differentiation | -3.49372 | 12.33327 | 6.475699 | 83 | 4 | 3.389831 |
| GO:0051147 | regulation of muscle cell differentiation | -3.38527 | 8.04765 | 5.580641 | 159 | 5 | 4.237288 |
| GO:1901796 | regulation of signal transduction by p53 class mediator | -3.13847 | 9.938456 | 5.691385 | 103 | 4 | 3.389831 |
| GO:0010830 | regulation of myotube differentiation | -3.10733 | 16.69013 | 6.670083 | 46 | 3 | 2.542373 |
| GO:0051155 | positive regulation of striated muscle cell differentiation | -2.90394 | 14.21751 | 6.088779 | 54 | 3 | 2.542373 |
| GO:0006974 | cellular response to DNA damage stimulus | -2.65566 | 3.176879 | 3.715995 | 725 | 9 | 7.627119 |
| GO:0051153 | regulation of striated muscle cell differentiation | -2.19503 | 7.997352 | 4.300863 | 96 | 3 | 2.542373 |
| GO:0038083 | peptidyl-tyrosine autophosphorylation | -8.16237 | 71.08757 | 18.62952 | 18 | 5 | 4.237288 |
| GO:0097242 | amyloid-beta clearance | -5.73235 | 44.507 | 13.07325 | 23 | 4 | 3.389831 |
| GO:0045056 | transcytosis | -4.13384 | 36.55932 | 10.20961 | 21 | 3 | 2.542373 |
| GO:0097061 | dendritic spine organization | -3.53567 | 23.26502 | 8.015165 | 33 | 3 | 2.542373 |
| GO:0043243 | positive regulation of protein-containing complex disassembly | -3.45911 | 21.93559 | 7.761864 | 35 | 3 | 2.542373 |
| GO:0099173 | postsynapse organization | -3.35967 | 11.37401 | 6.173209 | 90 | 4 | 3.389831 |
| GO:0106027 | neuron projection organization | -3.19355 | 17.85455 | 6.927169 | 43 | 3 | 2.542373 |
| GO:0071346 | cellular response to interferon-gamma | -8.09395 | 19.68579 | 11.95562 | 104 | 8 | 6.779661 |
| GO:0034341 | response to interferon-gamma | -7.43684 | 16.24859 | 10.74281 | 126 | 8 | 6.779661 |
| GO:0051770 | positive regulation of nitric-oxide synthase biosynthetic process | -6.29509 | 60.21535 | 15.29593 | 17 | 4 | 3.389831 |
| GO:0051769 | regulation of nitric-oxide synthase biosynthetic process | -5.89985 | 48.74576 | 13.70852 | 21 | 4 | 3.389831 |
| GO:0019221 | cytokine-mediated signaling pathway | -5.79736 | 7.108757 | 7.303033 | 360 | 10 | 8.474576 |
| GO:0007259 | receptor signaling pathway via JAK-STAT | -4.53519 | 22.74802 | 9.14418 | 45 | 4 | 3.389831 |
| GO:0097696 | receptor signaling pathway via STAT | -4.49699 | 22.2535 | 9.035149 | 46 | 4 | 3.389831 |
| GO:0032760 | positive regulation of tumor necrosis factor production | -8.09395 | 19.68579 | 11.95562 | 104 | 8 | 6.779661 |
| GO:1903557 | positive regulation of tumor necrosis factor superfamily cytokine production | -7.9639 | 18.95669 | 11.70876 | 108 | 8 | 6.779661 |
| GO:0055094 | response to lipoprotein particle | -6.81021 | 39.98676 | 13.82029 | 32 | 5 | 4.237288 |
| GO:0071402 | cellular response to lipoprotein particle stimulus | -6.60689 | 36.55932 | 13.18361 | 35 | 5 | 4.237288 |
| GO:0032680 | regulation of tumor necrosis factor production | -6.18925 | 11.18755 | 8.657853 | 183 | 8 | 6.779661 |
| GO:1903555 | regulation of tumor necrosis factor superfamily cytokine production | -6.1008 | 10.89001 | 8.519747 | 188 | 8 | 6.779661 |
| GO:0032757 | positive regulation of interleukin-8 production | -5.34384 | 20.63833 | 9.694859 | 62 | 5 | 4.237288 |
| GO:0002532 | production of molecular mediator involved in inflammatory response | -4.59225 | 51.18305 | 12.17602 | 15 | 3 | 2.542373 |
| GO:0032755 | positive regulation of interleukin-6 production | -4.39287 | 13.19151 | 7.53246 | 97 | 5 | 4.237288 |
| GO:0032677 | regulation of interleukin-8 production | -4.28821 | 12.54487 | 7.315071 | 102 | 5 | 4.237288 |
| GO:0071404 | cellular response to low-density lipoprotein particle stimulus | -4.13384 | 36.55932 | 10.20961 | 21 | 3 | 2.542373 |
| GO:0032653 | regulation of interleukin-10 production | -3.95689 | 16.24859 | 7.588366 | 63 | 4 | 3.389831 |
| GO:0032655 | regulation of interleukin-12 production | -3.95689 | 16.24859 | 7.588366 | 63 | 4 | 3.389831 |
| GO:0032722 | positive regulation of chemokine production | -3.77871 | 14.62373 | 7.14733 | 70 | 4 | 3.389831 |
| GO:0032733 | positive regulation of interleukin-10 production | -3.25467 | 18.72551 | 7.113454 | 41 | 3 | 2.542373 |
| GO:0032642 | regulation of chemokine production | -3.23653 | 10.55321 | 5.902399 | 97 | 4 | 3.389831 |
| GO:0032735 | positive regulation of interleukin-12 production | -3.22372 | 18.27966 | 7.018705 | 42 | 3 | 2.542373 |
| GO:0032675 | regulation of interleukin-6 production | -3.20725 | 7.353887 | 5.264581 | 174 | 5 | 4.237288 |
| GO:0042116 | macrophage activation | -2.85813 | 13.70975 | 5.962506 | 56 | 3 | 2.542373 |
| GO:0009620 | response to fungus | -2.79261 | 13.01264 | 5.784743 | 59 | 3 | 2.542373 |
| GO:0031623 | receptor internalization | -2.65274 | 11.63251 | 5.41599 | 66 | 3 | 2.542373 |
| GO:0006897 | endocytosis | -7.99941 | 7.194405 | 8.730116 | 498 | 14 | 11.86441 |
| GO:0006898 | receptor-mediated endocytosis | -5.5347 | 11.41023 | 8.191004 | 157 | 7 | 5.932203 |
| GO:0033138 | positive regulation of peptidyl-serine phosphorylation | -7.99592 | 19.13385 | 11.76922 | 107 | 8 | 6.779661 |
| GO:0033135 | regulation of peptidyl-serine phosphorylation | -6.9857 | 14.21751 | 9.957811 | 144 | 8 | 6.779661 |
| GO:0033033 | negative regulation of myeloid cell apoptotic process | -4.68792 | 54.83898 | 12.61992 | 14 | 3 | 2.542373 |
| GO:0033032 | regulation of myeloid cell apoptotic process | -3.799 | 28.43503 | 8.93257 | 27 | 3 | 2.542373 |
| GO:0045637 | regulation of myeloid cell differentiation | -7.96565 | 12.18644 | 10.18854 | 210 | 10 | 8.474576 |
| GO:0045639 | positive regulation of myeloid cell differentiation | -6.8608 | 17.91407 | 10.61117 | 100 | 7 | 5.932203 |
| GO:1900015 | regulation of cytokine production involved in inflammatory response | -6.29578 | 20.47322 | 10.57556 | 75 | 6 | 5.084746 |
| GO:1905562 | regulation of vascular endothelial cell proliferation | -5.94872 | 27.22503 | 11.26933 | 47 | 5 | 4.237288 |
| GO:0045648 | positive regulation of erythrocyte differentiation | -5.08071 | 31.02003 | 10.80688 | 33 | 4 | 3.389831 |
| GO:0045646 | regulation of erythrocyte differentiation | -4.45967 | 21.78002 | 8.929519 | 47 | 4 | 3.389831 |
| GO:1905564 | positive regulation of vascular endothelial cell proliferation | -3.90092 | 30.70983 | 9.307754 | 25 | 3 | 2.542373 |
| GO:1900017 | positive regulation of cytokine production involved in inflammatory response | -3.799 | 28.43503 | 8.93257 | 27 | 3 | 2.542373 |
| GO:0042789 | mRNA transcription by RNA polymerase II | -3.25467 | 18.72551 | 7.113454 | 41 | 3 | 2.542373 |
| GO:0009299 | mRNA transcription | -3.10733 | 16.69013 | 6.670083 | 46 | 3 | 2.542373 |
| GO:1902895 | positive regulation of miRNA transcription | -3.10733 | 16.69013 | 6.670083 | 46 | 3 | 2.542373 |
| GO:1902893 | regulation of miRNA transcription | -2.77157 | 12.79576 | 5.728335 | 60 | 3 | 2.542373 |
| GO:0001503 | ossification | -7.95962 | 10.3116 | 9.679941 | 273 | 11 | 9.322034 |
| GO:0001501 | skeletal system development | -7.01455 | 6.587917 | 7.93145 | 505 | 13 | 11.01695 |
| GO:0060348 | bone development | -3.75196 | 7.346849 | 5.766793 | 209 | 6 | 5.084746 |
| GO:0045596 | negative regulation of cell differentiation | -7.82548 | 5.85786 | 8.138866 | 699 | 16 | 13.55932 |
| GO:0010828 | positive regulation of glucose transmembrane transport | -7.70822 | 34.89753 | 14.09308 | 44 | 6 | 5.084746 |
| GO:0010827 | regulation of glucose transmembrane transport | -7.61248 | 22.96675 | 12.16661 | 78 | 7 | 5.932203 |
| GO:0046324 | regulation of glucose import | -6.87953 | 25.59153 | 11.9423 | 60 | 6 | 5.084746 |
| GO:0046326 | positive regulation of glucose import | -6.4816 | 34.58314 | 12.80216 | 37 | 5 | 4.237288 |
| GO:0060644 | mammary gland epithelial cell differentiation | -6.18726 | 56.87006 | 14.85045 | 18 | 4 | 3.389831 |
| GO:0008286 | insulin receptor signaling pathway | -5.41479 | 21.32627 | 9.870976 | 60 | 5 | 4.237288 |
| GO:0050994 | regulation of lipid catabolic process | -5.379 | 20.97666 | 9.781868 | 61 | 5 | 4.237288 |
| GO:0032885 | regulation of polysaccharide biosynthetic process | -4.78536 | 26.24772 | 9.881661 | 39 | 4 | 3.389831 |
| GO:0010907 | positive regulation of glucose metabolic process | -4.65549 | 24.37288 | 9.493668 | 42 | 4 | 3.389831 |
| GO:0045725 | positive regulation of glycogen biosynthetic process | -4.59225 | 51.18305 | 12.17602 | 15 | 3 | 2.542373 |
| GO:0032881 | regulation of polysaccharide metabolic process | -4.53519 | 22.74802 | 9.14418 | 45 | 4 | 3.389831 |
| GO:0019217 | regulation of fatty acid metabolic process | -4.50356 | 13.90844 | 7.766495 | 92 | 5 | 4.237288 |
| GO:0070875 | positive regulation of glycogen metabolic process | -4.50331 | 47.98411 | 11.77392 | 16 | 3 | 2.542373 |
| GO:0031998 | regulation of fatty acid beta-oxidation | -4.19955 | 38.38729 | 10.47557 | 20 | 3 | 2.542373 |
| GO:0010676 | positive regulation of cellular carbohydrate metabolic process | -4.15773 | 18.27966 | 8.106384 | 56 | 4 | 3.389831 |
| GO:0045600 | positive regulation of fat cell differentiation | -3.85261 | 15.27852 | 7.32821 | 67 | 4 | 3.389831 |
| GO:0010565 | regulation of cellular ketone metabolic process | -3.75881 | 9.69376 | 6.269613 | 132 | 5 | 4.237288 |
| GO:0005979 | regulation of glycogen biosynthetic process | -3.61734 | 24.76599 | 8.291913 | 31 | 3 | 2.542373 |
| GO:0010962 | regulation of glucan biosynthetic process | -3.61734 | 24.76599 | 8.291913 | 31 | 3 | 2.542373 |
| GO:0045598 | regulation of fat cell differentiation | -3.61131 | 9.011101 | 5.993144 | 142 | 5 | 4.237288 |
| GO:0046320 | regulation of fatty acid oxidation | -3.57583 | 23.99206 | 8.150381 | 32 | 3 | 2.542373 |
| GO:0070873 | regulation of glycogen metabolic process | -3.38707 | 20.74989 | 7.528814 | 37 | 3 | 2.542373 |
| GO:0005975 | carbohydrate metabolic process | -3.37193 | 4.50952 | 4.719108 | 454 | 8 | 6.779661 |
| GO:0045923 | positive regulation of fatty acid metabolic process | -3.31906 | 19.68579 | 7.313399 | 39 | 3 | 2.542373 |
| GO:0006006 | glucose metabolic process | -3.20312 | 10.34001 | 5.830058 | 99 | 4 | 3.389831 |
| GO:0043255 | regulation of carbohydrate biosynthetic process | -3.15437 | 10.03589 | 5.725333 | 102 | 4 | 3.389831 |
| GO:0010906 | regulation of glucose metabolic process | -2.85197 | 8.322447 | 5.096711 | 123 | 4 | 3.389831 |
| GO:0006112 | energy reserve metabolic process | -2.75089 | 12.586 | 5.673255 | 61 | 3 | 2.542373 |
| GO:0019318 | hexose metabolic process | -2.63529 | 7.260007 | 4.666546 | 141 | 4 | 3.389831 |
| GO:0015980 | energy derivation by oxidation of organic compounds | -2.49212 | 5.057614 | 4.059315 | 253 | 5 | 4.237288 |
| GO:0005996 | monosaccharide metabolic process | -2.4284 | 6.358143 | 4.269558 | 161 | 4 | 3.389831 |
| GO:0044262 | cellular carbohydrate metabolic process | -2.41883 | 6.318895 | 4.251497 | 162 | 4 | 3.389831 |
| GO:0008643 | carbohydrate transport | -2.40059 | 9.478343 | 4.785547 | 81 | 3 | 2.542373 |
| GO:0042113 | B cell activation | -7.61492 | 13.54845 | 10.27627 | 170 | 9 | 7.627119 |
| GO:0097191 | extrinsic apoptotic signaling pathway | -7.17776 | 19.90452 | 11.24941 | 90 | 7 | 5.932203 |
| GO:0030183 | B cell differentiation | -3.95299 | 10.66314 | 6.64306 | 120 | 5 | 4.237288 |
| GO:0008625 | extrinsic apoptotic signaling pathway via death domain receptors | -3.42255 | 21.32627 | 7.642983 | 36 | 3 | 2.542373 |
| GO:1903201 | regulation of oxidative stress-induced cell death | -7.61248 | 22.96675 | 12.16661 | 78 | 7 | 5.932203 |
| GO:1900407 | regulation of cellular response to oxidative stress | -7.07883 | 19.26244 | 11.04752 | 93 | 7 | 5.932203 |
| GO:0032768 | regulation of monooxygenase activity | -7.01515 | 26.93845 | 12.27684 | 57 | 6 | 5.084746 |
| GO:1902882 | regulation of response to oxidative stress | -6.80152 | 17.56281 | 10.49455 | 102 | 7 | 5.932203 |
| GO:0051341 | regulation of oxidoreductase activity | -6.63095 | 16.5871 | 10.16366 | 108 | 7 | 5.932203 |
| GO:1902176 | negative regulation of oxidative stress-induced intrinsic apoptotic signaling pathway | -5.99031 | 51.18305 | 14.06083 | 20 | 4 | 3.389831 |
| GO:1903202 | negative regulation of oxidative stress-induced cell death | -5.60392 | 23.26502 | 10.35131 | 55 | 5 | 4.237288 |
| GO:1902175 | regulation of oxidative stress-induced intrinsic apoptotic signaling pathway | -5.31173 | 35.29866 | 11.5739 | 29 | 4 | 3.389831 |
| GO:0050999 | regulation of nitric-oxide synthase activity | -4.65549 | 24.37288 | 9.493668 | 42 | 4 | 3.389831 |
| GO:0032770 | positive regulation of monooxygenase activity | -3.57583 | 23.99206 | 8.150381 | 32 | 3 | 2.542373 |
| GO:0051353 | positive regulation of oxidoreductase activity | -2.77157 | 12.79576 | 5.728335 | 60 | 3 | 2.542373 |
| GO:0055072 | iron ion homeostasis | -2.34191 | 9.032303 | 4.644688 | 85 | 3 | 2.542373 |
| GO:0051090 | regulation of DNA-binding transcription factor activity | -7.57365 | 7.360394 | 8.533417 | 452 | 13 | 11.01695 |
| GO:0051091 | positive regulation of DNA-binding transcription factor activity | -7.01337 | 9.657179 | 8.865602 | 265 | 10 | 8.474576 |
| GO:0007249 | I-kappaB kinase/NF-kappaB signaling | -4.18861 | 18.61202 | 8.188064 | 55 | 4 | 3.389831 |
| GO:0051092 | positive regulation of NF-kappaB transcription factor activity | -3.44885 | 8.308937 | 5.69534 | 154 | 5 | 4.237288 |
| GO:0001818 | negative regulation of cytokine production | -2.487 | 4.183901 | 3.843639 | 367 | 6 | 5.084746 |
| GO:0002221 | pattern recognition receptor signaling pathway | -2.18261 | 7.914905 | 4.272338 | 97 | 3 | 2.542373 |
| GO:0051054 | positive regulation of DNA metabolic process | -7.5689 | 9.446536 | 9.177728 | 298 | 11 | 9.322034 |
| GO:0051052 | regulation of DNA metabolic process | -5.05772 | 5.242212 | 6.21256 | 537 | 11 | 9.322034 |
| GO:0031647 | regulation of protein stability | -4.40137 | 6.37795 | 6.067151 | 321 | 8 | 6.779661 |
| GO:2000573 | positive regulation of DNA biosynthetic process | -3.70814 | 14.02275 | 6.977257 | 73 | 4 | 3.389831 |
| GO:0051972 | regulation of telomerase activity | -3.07991 | 16.33502 | 6.58971 | 47 | 3 | 2.542373 |
| GO:2000278 | regulation of DNA biosynthetic process | -2.90494 | 8.602193 | 5.204328 | 119 | 4 | 3.389831 |
| GO:0035924 | cellular response to vascular endothelial growth factor stimulus | -7.41825 | 31.33656 | 13.31104 | 49 | 6 | 5.084746 |
| GO:0048010 | vascular endothelial growth factor receptor signaling pathway | -6.95768 | 42.65254 | 14.29595 | 30 | 5 | 4.237288 |
| GO:0038084 | vascular endothelial growth factor signaling pathway | -3.9552 | 31.98941 | 9.512319 | 24 | 3 | 2.542373 |
| GO:0002244 | hematopoietic progenitor cell differentiation | -3.30566 | 11.00711 | 6.053614 | 93 | 4 | 3.389831 |
| GO:0060537 | muscle tissue development | -7.40839 | 9.110252 | 8.975153 | 309 | 11 | 9.322034 |
| GO:0048738 | cardiac muscle tissue development | -6.35535 | 11.76622 | 8.920466 | 174 | 8 | 6.779661 |
| GO:0014706 | striated muscle tissue development | -6.26194 | 11.43755 | 8.772252 | 179 | 8 | 6.779661 |
| GO:0061061 | muscle structure development | -5.484 | 5.816256 | 6.690147 | 484 | 11 | 9.322034 |
| GO:0035051 | cardiocyte differentiation | -5.29445 | 13.83326 | 8.483849 | 111 | 6 | 5.084746 |
| GO:0051146 | striated muscle cell differentiation | -4.88838 | 9.093435 | 7.138092 | 197 | 7 | 5.932203 |
| GO:0003015 | heart process | -4.1507 | 11.73923 | 7.03504 | 109 | 5 | 4.237288 |
| GO:0042692 | muscle cell differentiation | -4.11063 | 6.863628 | 5.958905 | 261 | 7 | 5.932203 |
| GO:0055007 | cardiac muscle cell differentiation | -3.45421 | 12.04307 | 6.385667 | 85 | 4 | 3.389831 |
| GO:0060047 | heart contraction | -3.30566 | 11.00711 | 6.053614 | 93 | 4 | 3.389831 |
| GO:0035994 | response to muscle stretch | -7.37939 | 51.18305 | 15.72178 | 25 | 5 | 4.237288 |
| GO:0001892 | embryonic placenta development | -7.31534 | 20.83031 | 11.53435 | 86 | 7 | 5.932203 |
| GO:0010001 | glial cell differentiation | -6.49119 | 12.25941 | 9.138462 | 167 | 8 | 6.779661 |
| GO:0048538 | thymus development | -6.04483 | 28.43503 | 11.53534 | 45 | 5 | 4.237288 |
| GO:0060711 | labyrinthine layer development | -5.94872 | 27.22503 | 11.26933 | 47 | 5 | 4.237288 |
| GO:0042063 | gliogenesis | -5.69437 | 9.611841 | 7.89983 | 213 | 8 | 6.779661 |
| GO:0050673 | epithelial cell proliferation | -4.54967 | 14.21751 | 7.865278 | 90 | 5 | 4.237288 |
| GO:0060324 | face development | -4.42319 | 21.32627 | 8.827113 | 48 | 4 | 3.389831 |
| GO:2000641 | regulation of early endosome to late endosome transport | -4.34229 | 42.65254 | 11.07139 | 18 | 3 | 2.542373 |
| GO:0048708 | astrocyte differentiation | -4.28499 | 19.68579 | 8.446606 | 52 | 4 | 3.389831 |
| GO:0030878 | thyroid gland development | -3.90092 | 30.70983 | 9.307754 | 25 | 3 | 2.542373 |
| GO:0035270 | endocrine system development | -3.88597 | 10.31916 | 6.512926 | 124 | 5 | 4.237288 |
| GO:1903649 | regulation of cytoplasmic transport | -3.75102 | 27.41949 | 8.759913 | 28 | 3 | 2.542373 |
| GO:0060674 | placenta blood vessel development | -3.61734 | 24.76599 | 8.291913 | 31 | 3 | 2.542373 |
| GO:0048645 | animal organ formation | -3.42255 | 21.32627 | 7.642983 | 36 | 3 | 2.542373 |
| GO:0070371 | ERK1 and ERK2 cascade | -3.35259 | 20.20384 | 7.419047 | 38 | 3 | 2.542373 |
| GO:0060425 | lung morphogenesis | -3.19355 | 17.85455 | 6.927169 | 43 | 3 | 2.542373 |
| GO:0002274 | myeloid leukocyte activation | -7.12893 | 14.83567 | 10.20303 | 138 | 8 | 6.779661 |
| GO:0034110 | regulation of homotypic cell-cell adhesion | -6.5433 | 35.54379 | 12.98898 | 36 | 5 | 4.237288 |
| GO:0090330 | regulation of platelet aggregation | -5.31173 | 35.29866 | 11.5739 | 29 | 4 | 3.389831 |
| GO:0016572 | histone phosphorylation | -5.08071 | 31.02003 | 10.80688 | 33 | 4 | 3.389831 |
| GO:0034350 | regulation of glial cell apoptotic process | -5.02781 | 69.79507 | 14.29314 | 11 | 3 | 2.542373 |
| GO:0042119 | neutrophil activation | -3.799 | 28.43503 | 8.93257 | 27 | 3 | 2.542373 |
| GO:0036230 | granulocyte activation | -3.61734 | 24.76599 | 8.291913 | 31 | 3 | 2.542373 |
| GO:1903522 | regulation of blood circulation | -7.10609 | 9.880898 | 8.990257 | 259 | 10 | 8.474576 |
| GO:0002026 | regulation of the force of heart contraction | -3.84891 | 29.52868 | 9.114867 | 26 | 3 | 2.542373 |
| GO:0008016 | regulation of heart contraction | -3.74074 | 7.311864 | 5.748805 | 210 | 6 | 5.084746 |
| GO:0031644 | regulation of nervous system process | -3.61131 | 9.011101 | 5.993144 | 142 | 5 | 4.237288 |
| GO:0002028 | regulation of sodium ion transport | -3.34145 | 11.24902 | 6.132723 | 91 | 4 | 3.389831 |
| GO:0060284 | regulation of cell development | -7.05434 | 6.640516 | 7.9738 | 501 | 13 | 11.01695 |
| GO:0010720 | positive regulation of cell development | -5.57307 | 7.755008 | 7.327321 | 297 | 9 | 7.627119 |
| GO:0051960 | regulation of nervous system development | -4.19849 | 5.199181 | 5.576613 | 443 | 9 | 7.627119 |
| GO:0050767 | regulation of neurogenesis | -4.02032 | 5.624511 | 5.559616 | 364 | 8 | 6.779661 |
| GO:0050769 | positive regulation of neurogenesis | -3.61068 | 6.916628 | 5.541763 | 222 | 6 | 5.084746 |
| GO:0051962 | positive regulation of nervous system development | -3.16102 | 5.687006 | 4.84532 | 270 | 6 | 5.084746 |
| GO:0070997 | neuron death | -6.83595 | 25.17199 | 11.83617 | 61 | 6 | 5.084746 |
| GO:0007005 | mitochondrion organization | -5.97895 | 6.546669 | 7.255639 | 430 | 11 | 9.322034 |
| GO:0051402 | neuron apoptotic process | -5.68481 | 24.14295 | 10.56168 | 53 | 5 | 4.237288 |
| GO:0008637 | apoptotic mitochondrial changes | -5.45123 | 21.68773 | 9.962274 | 59 | 5 | 4.237288 |
| GO:0007006 | mitochondrial membrane organization | -5.09915 | 12.79576 | 8.109165 | 120 | 6 | 5.084746 |
| GO:0090559 | regulation of membrane permeability | -4.87934 | 16.61787 | 8.59442 | 77 | 5 | 4.237288 |
| GO:0010212 | response to ionizing radiation | -4.6995 | 10.89001 | 7.372546 | 141 | 6 | 5.084746 |
| GO:2001239 | regulation of extrinsic apoptotic signaling pathway in absence of ligand | -4.57431 | 23.26502 | 9.256803 | 44 | 4 | 3.389831 |
| GO:0006839 | mitochondrial transport | -4.5478 | 10.23661 | 7.102879 | 150 | 6 | 5.084746 |
| GO:0001836 | release of cytochrome c from mitochondria | -4.19955 | 38.38729 | 10.47557 | 20 | 3 | 2.542373 |
| GO:0010332 | response to gamma radiation | -4.15773 | 18.27966 | 8.106384 | 56 | 4 | 3.389831 |
| GO:0046902 | regulation of mitochondrial membrane permeability | -3.98407 | 16.51066 | 7.657153 | 62 | 4 | 3.389831 |
| GO:0008630 | intrinsic apoptotic signaling pathway in response to DNA damage | -3.82759 | 15.05384 | 7.266643 | 68 | 4 | 3.389831 |
| GO:0038034 | signal transduction in absence of ligand | -3.75102 | 27.41949 | 8.759913 | 28 | 3 | 2.542373 |
| GO:0097192 | extrinsic apoptotic signaling pathway in absence of ligand | -3.75102 | 27.41949 | 8.759913 | 28 | 3 | 2.542373 |
| GO:1902230 | negative regulation of intrinsic apoptotic signaling pathway in response to DNA damage | -3.66031 | 25.59153 | 8.440279 | 30 | 3 | 2.542373 |
| GO:1901099 | negative regulation of signal transduction in absence of ligand | -3.53567 | 23.26502 | 8.015165 | 33 | 3 | 2.542373 |
| GO:2001240 | negative regulation of extrinsic apoptotic signaling pathway in absence of ligand | -3.53567 | 23.26502 | 8.015165 | 33 | 3 | 2.542373 |
| GO:1902229 | regulation of intrinsic apoptotic signaling pathway in response to DNA damage | -3.35259 | 20.20384 | 7.419047 | 38 | 3 | 2.542373 |
| GO:0043279 | response to alkaloid | -3.23653 | 10.55321 | 5.902399 | 97 | 4 | 3.389831 |
| GO:0090199 | regulation of release of cytochrome c from mitochondria | -3.07991 | 16.33502 | 6.58971 | 47 | 3 | 2.542373 |
| GO:0010823 | negative regulation of mitochondrion organization | -2.97618 | 15.05384 | 6.291323 | 51 | 3 | 2.542373 |
| GO:2001020 | regulation of response to DNA damage stimulus | -2.87395 | 5.001601 | 4.413842 | 307 | 6 | 5.084746 |
| GO:2001021 | negative regulation of response to DNA damage stimulus | -2.38563 | 9.362753 | 4.749431 | 82 | 3 | 2.542373 |
| GO:0071695 | anatomical structure maturation | -6.8099 | 10.91582 | 9.052889 | 211 | 9 | 7.627119 |
| GO:0021700 | developmental maturation | -6.2047 | 9.249949 | 8.187358 | 249 | 9 | 7.627119 |
| GO:0010821 | regulation of mitochondrion organization | -5.66639 | 11.94271 | 8.414858 | 150 | 7 | 5.932203 |
| GO:0048469 | cell maturation | -5.42685 | 10.99023 | 8.010125 | 163 | 7 | 5.932203 |
| GO:0010822 | positive regulation of mitochondrion organization | -3.64064 | 13.46922 | 6.816922 | 76 | 4 | 3.389831 |
| GO:0090287 | regulation of cellular response to growth factor stimulus | -2.00815 | 3.865789 | 3.283571 | 331 | 5 | 4.237288 |
| GO:0002831 | regulation of response to biotic stimulus | -6.80032 | 7.929768 | 8.226131 | 355 | 11 | 9.322034 |
| GO:0002833 | positive regulation of response to biotic stimulus | -6.15355 | 11.06661 | 8.601975 | 185 | 8 | 6.779661 |
| GO:0045088 | regulation of innate immune response | -5.36473 | 8.675093 | 7.413755 | 236 | 8 | 6.779661 |
| GO:0032481 | positive regulation of type I interferon production | -5.34384 | 20.63833 | 9.694859 | 62 | 5 | 4.237288 |
| GO:0002218 | activation of innate immune response | -5.30928 | 20.31073 | 9.609869 | 63 | 5 | 4.237288 |
| GO:0045089 | positive regulation of innate immune response | -4.64778 | 10.66314 | 7.280013 | 144 | 6 | 5.084746 |
| GO:0032479 | regulation of type I interferon production | -4.24789 | 12.30362 | 7.232329 | 104 | 5 | 4.237288 |
| GO:0002230 | positive regulation of defense response to virus by host | -3.61734 | 24.76599 | 8.291913 | 31 | 3 | 2.542373 |
| GO:0032728 | positive regulation of interferon-beta production | -3.31906 | 19.68579 | 7.313399 | 39 | 3 | 2.542373 |
| GO:0050691 | regulation of defense response to virus by host | -3.22372 | 18.27966 | 7.018705 | 42 | 3 | 2.542373 |
| GO:0032648 | regulation of interferon-beta production | -2.83588 | 13.46922 | 5.901766 | 57 | 3 | 2.542373 |
| GO:0050688 | regulation of defense response to virus | -2.51131 | 10.37494 | 5.057224 | 74 | 3 | 2.542373 |
| GO:0070167 | regulation of biomineral tissue development | -6.74349 | 17.22507 | 10.38119 | 104 | 7 | 5.932203 |
| GO:0110149 | regulation of biomineralization | -6.68665 | 16.90006 | 10.27094 | 106 | 7 | 5.932203 |
| GO:0030278 | regulation of ossification | -6.29413 | 14.80501 | 9.530074 | 121 | 7 | 5.932203 |
| GO:0070168 | negative regulation of biomineral tissue development | -5.25089 | 34.12203 | 11.36811 | 30 | 4 | 3.389831 |
| GO:0110150 | negative regulation of biomineralization | -5.1922 | 33.02132 | 11.17218 | 31 | 4 | 3.389831 |
| GO:0030500 | regulation of bone mineralization | -3.47384 | 12.18644 | 6.430301 | 84 | 4 | 3.389831 |
| GO:0030279 | negative regulation of ossification | -3.38707 | 20.74989 | 7.528814 | 37 | 3 | 2.542373 |
| GO:0060416 | response to growth hormone | -6.74021 | 38.77504 | 13.5986 | 33 | 5 | 4.237288 |
| GO:0060396 | growth hormone receptor signaling pathway | -5.99031 | 51.18305 | 14.06083 | 20 | 4 | 3.389831 |
| GO:0071378 | cellular response to growth hormone stimulus | -5.89985 | 48.74576 | 13.70852 | 21 | 4 | 3.389831 |
| GO:0072594 | establishment of protein localization to organelle | -4.33541 | 6.241835 | 5.978424 | 328 | 8 | 6.779661 |
| GO:0006886 | intracellular protein transport | -3.51247 | 3.819631 | 4.622709 | 670 | 10 | 8.474576 |
| GO:0033365 | protein localization to organelle | -3.44182 | 3.741451 | 4.542328 | 684 | 10 | 8.474576 |
| GO:0034504 | protein localization to nucleus | -3.16269 | 7.188631 | 5.186605 | 178 | 5 | 4.237288 |
| GO:0006606 | protein import into nucleus | -3.06142 | 9.478343 | 5.528353 | 108 | 4 | 3.389831 |
| GO:0051170 | import into nucleus | -3.00256 | 9.139831 | 5.405379 | 112 | 4 | 3.389831 |
| GO:0006913 | nucleocytoplasmic transport | -2.62174 | 5.421933 | 4.271366 | 236 | 5 | 4.237288 |
| GO:0051169 | nuclear transport | -2.62174 | 5.421933 | 4.271366 | 236 | 5 | 4.237288 |
| GO:0009112 | nucleobase metabolic process | -6.74021 | 38.77504 | 13.5986 | 33 | 5 | 4.237288 |
| GO:0046112 | nucleobase biosynthetic process | -4.34229 | 42.65254 | 11.07139 | 18 | 3 | 2.542373 |
| GO:0006144 | purine nucleobase metabolic process | -4.26889 | 40.40767 | 10.7619 | 19 | 3 | 2.542373 |
| GO:0055086 | nucleobase-containing small molecule metabolic process | -2.28517 | 3.342177 | 3.426777 | 536 | 7 | 5.932203 |
| GO:0030888 | regulation of B cell proliferation | -6.70967 | 23.99206 | 11.5325 | 64 | 6 | 5.084746 |
| GO:2000106 | regulation of leukocyte apoptotic process | -5.97271 | 18.06461 | 9.867627 | 85 | 6 | 5.084746 |
| GO:2000107 | negative regulation of leukocyte apoptotic process | -5.8125 | 25.59153 | 10.89997 | 50 | 5 | 4.237288 |
| GO:0050866 | negative regulation of cell activation | -5.64918 | 9.478343 | 7.83234 | 216 | 8 | 6.779661 |
| GO:0070228 | regulation of lymphocyte apoptotic process | -5.52614 | 22.44871 | 10.15181 | 57 | 5 | 4.237288 |
| GO:0002699 | positive regulation of immune effector process | -5.19394 | 8.222177 | 7.167383 | 249 | 8 | 6.779661 |
| GO:0070229 | negative regulation of lymphocyte apoptotic process | -5.08071 | 31.02003 | 10.80688 | 33 | 4 | 3.389831 |
| GO:0002697 | regulation of immune effector process | -4.93919 | 6.469768 | 6.502254 | 356 | 9 | 7.627119 |
| GO:0032729 | positive regulation of interferon-gamma production | -4.87934 | 16.61787 | 8.59442 | 77 | 5 | 4.237288 |
| GO:0050864 | regulation of B cell activation | -4.8459 | 8.957034 | 7.071378 | 200 | 7 | 5.932203 |
| GO:0045579 | positive regulation of B cell differentiation | -4.68792 | 54.83898 | 12.61992 | 14 | 3 | 2.542373 |
| GO:0030890 | positive regulation of B cell proliferation | -4.65549 | 24.37288 | 9.493668 | 42 | 4 | 3.389831 |
| GO:0050871 | positive regulation of B cell activation | -4.51545 | 10.10192 | 7.046044 | 152 | 6 | 5.084746 |
| GO:0032660 | regulation of interleukin-17 production | -4.45967 | 21.78002 | 8.929519 | 47 | 4 | 3.389831 |
| GO:0002703 | regulation of leukocyte mediated immunity | -4.38573 | 7.590707 | 6.366292 | 236 | 7 | 5.932203 |
| GO:0002700 | regulation of production of molecular mediator of immune response | -4.28689 | 9.19456 | 6.650939 | 167 | 6 | 5.084746 |
| GO:0002822 | regulation of adaptive immune response based on somatic recombination of immune receptors built from immunoglobulin superfamily domains | -4.14683 | 8.675093 | 6.414188 | 177 | 6 | 5.084746 |
| GO:0002902 | regulation of B cell apoptotic process | -4.13384 | 36.55932 | 10.20961 | 21 | 3 | 2.542373 |
| GO:0002824 | positive regulation of adaptive immune response based on somatic recombination of immune receptors built from immunoglobulin superfamily domains | -4.09468 | 11.42479 | 6.92274 | 112 | 5 | 4.237288 |
| GO:0002821 | positive regulation of adaptive immune response | -4.00488 | 10.93655 | 6.744758 | 117 | 5 | 4.237288 |
| GO:0032649 | regulation of interferon-gamma production | -4.00488 | 10.93655 | 6.744758 | 117 | 5 | 4.237288 |
| GO:0002819 | regulation of adaptive immune response | -3.95252 | 7.997352 | 6.092061 | 192 | 6 | 5.084746 |
| GO:0032740 | positive regulation of interleukin-17 production | -3.84891 | 29.52868 | 9.114867 | 26 | 3 | 2.542373 |
| GO:0045822 | negative regulation of heart contraction | -3.84891 | 29.52868 | 9.114867 | 26 | 3 | 2.542373 |
| GO:1903523 | negative regulation of blood circulation | -3.799 | 28.43503 | 8.93257 | 27 | 3 | 2.542373 |
| GO:0045577 | regulation of B cell differentiation | -3.61734 | 24.76599 | 8.291913 | 31 | 3 | 2.542373 |
| GO:0002718 | regulation of cytokine production involved in immune response | -3.21973 | 10.44552 | 5.865968 | 98 | 4 | 3.389831 |
| GO:0002695 | negative regulation of leukocyte activation | -3.00517 | 6.629929 | 4.91438 | 193 | 5 | 4.237288 |
| GO:0002702 | positive regulation of production of molecular mediator of immune response | -2.89151 | 8.530508 | 5.176956 | 120 | 4 | 3.389831 |
| GO:0050672 | negative regulation of lymphocyte proliferation | -2.35629 | 9.139831 | 4.679019 | 84 | 3 | 2.542373 |
| GO:0032945 | negative regulation of mononuclear cell proliferation | -2.34191 | 9.032303 | 4.644688 | 85 | 3 | 2.542373 |
| GO:0002706 | regulation of lymphocyte mediated immunity | -2.30031 | 5.849492 | 4.029695 | 175 | 4 | 3.389831 |
| GO:0070664 | negative regulation of leukocyte proliferation | -2.25936 | 8.436767 | 4.44995 | 91 | 3 | 2.542373 |
| GO:0007423 | sensory organ development | -6.54609 | 5.994411 | 7.437958 | 555 | 13 | 11.01695 |
| GO:0001654 | eye development | -4.82508 | 6.258797 | 6.357226 | 368 | 9 | 7.627119 |
| GO:0150063 | visual system development | -4.788 | 6.191498 | 6.310309 | 372 | 9 | 7.627119 |
| GO:0048880 | sensory system development | -4.73324 | 6.09322 | 6.241206 | 378 | 9 | 7.627119 |
| GO:0043010 | camera-type eye development | -4.41092 | 6.397881 | 6.080042 | 320 | 8 | 6.779661 |
| GO:0090596 | sensory organ morphogenesis | -3.2292 | 5.860655 | 4.949172 | 262 | 6 | 5.084746 |
| GO:0060041 | retina development in camera-type eye | -2.59136 | 7.059731 | 4.581181 | 145 | 4 | 3.389831 |
| GO:0048592 | eye morphogenesis | -2.52796 | 6.779212 | 4.459031 | 151 | 4 | 3.389831 |
| GO:0003376 | sphingosine-1-phosphate receptor signaling pathway | -6.53391 | 68.24407 | 16.31558 | 15 | 4 | 3.389831 |
| GO:0090520 | sphingolipid mediated signaling pathway | -6.41029 | 63.97881 | 15.78209 | 16 | 4 | 3.389831 |
| GO:0048015 | phosphatidylinositol-mediated signaling | -6.33062 | 20.74989 | 10.65389 | 74 | 6 | 5.084746 |
| GO:0048017 | inositol lipid-mediated signaling | -6.19421 | 19.68579 | 10.3494 | 78 | 6 | 5.084746 |
| GO:0014065 | phosphatidylinositol 3-kinase signaling | -4.83105 | 26.93845 | 10.02084 | 38 | 4 | 3.389831 |
| GO:0048009 | insulin-like growth factor receptor signaling pathway | -4.68792 | 54.83898 | 12.61992 | 14 | 3 | 2.542373 |
| GO:0045833 | negative regulation of lipid metabolic process | -4.24789 | 12.30362 | 7.232329 | 104 | 5 | 4.237288 |
| GO:0050995 | negative regulation of lipid catabolic process | -3.84891 | 29.52868 | 9.114867 | 26 | 3 | 2.542373 |
| GO:0006650 | glycerophospholipid metabolic process | -2.2304 | 4.382111 | 3.637341 | 292 | 5 | 4.237288 |
| GO:0051099 | positive regulation of binding | -6.39354 | 11.90304 | 8.981459 | 172 | 8 | 6.779661 |
| GO:0032092 | positive regulation of protein binding | -3.47384 | 12.18644 | 6.430301 | 84 | 4 | 3.389831 |
| GO:0030099 | myeloid cell differentiation | -6.36874 | 9.677468 | 8.417722 | 238 | 9 | 7.627119 |
| GO:0002573 | myeloid leukocyte differentiation | -5.18391 | 13.237 | 8.270551 | 116 | 6 | 5.084746 |
| GO:0030225 | macrophage differentiation | -3.799 | 28.43503 | 8.93257 | 27 | 3 | 2.542373 |
| GO:0060964 | regulation of miRNA-mediated gene silencing | -6.25169 | 31.20918 | 12.1233 | 41 | 5 | 4.237288 |
| GO:1900368 | regulation of post-transcriptional gene silencing by RNA | -6.14567 | 29.75759 | 11.81928 | 43 | 5 | 4.237288 |
| GO:0060147 | regulation of post-transcriptional gene silencing | -6.09463 | 29.08128 | 11.67494 | 44 | 5 | 4.237288 |
| GO:0060966 | regulation of gene silencing by RNA | -6.04483 | 28.43503 | 11.53534 | 45 | 5 | 4.237288 |
| GO:1903798 | regulation of production of miRNAs involved in gene silencing by miRNA | -4.13384 | 36.55932 | 10.20961 | 21 | 3 | 2.542373 |
| GO:0070920 | regulation of production of small RNA involved in gene silencing by RNA | -4.07141 | 34.89753 | 9.96168 | 22 | 3 | 2.542373 |
| GO:2000637 | positive regulation of miRNA-mediated gene silencing | -4.01195 | 33.38025 | 9.729812 | 23 | 3 | 2.542373 |
| GO:0060148 | positive regulation of post-transcriptional gene silencing | -3.9552 | 31.98941 | 9.512319 | 24 | 3 | 2.542373 |
| GO:1900370 | positive regulation of post-transcriptional gene silencing by RNA | -3.9552 | 31.98941 | 9.512319 | 24 | 3 | 2.542373 |
| GO:0048145 | regulation of fibroblast proliferation | -6.16129 | 19.4366 | 10.27681 | 79 | 6 | 5.084746 |
| GO:0048146 | positive regulation of fibroblast proliferation | -5.9023 | 26.65784 | 11.14246 | 48 | 5 | 4.237288 |
| GO:0045840 | positive regulation of mitotic nuclear division | -3.16411 | 17.44877 | 6.838663 | 44 | 3 | 2.542373 |
| GO:0007088 | regulation of mitotic nuclear division | -2.91849 | 8.675093 | 5.232024 | 118 | 4 | 3.389831 |
| GO:0051785 | positive regulation of nuclear division | -2.79261 | 13.01264 | 5.784743 | 59 | 3 | 2.542373 |
| GO:0051783 | regulation of nuclear division | -2.59136 | 7.059731 | 4.581181 | 145 | 4 | 3.389831 |
| GO:0030029 | actin filament-based process | -6.15686 | 5.535605 | 7.034489 | 601 | 13 | 11.01695 |
| GO:0030036 | actin cytoskeleton organization | -5.05017 | 5.232468 | 6.204164 | 538 | 11 | 9.322034 |
| GO:0097435 | supramolecular fiber organization | -4.96816 | 5.127628 | 6.113159 | 549 | 11 | 9.322034 |
| GO:0007015 | actin filament organization | -4.04907 | 6.709389 | 5.869061 | 267 | 7 | 5.932203 |
| GO:0030041 | actin filament polymerization | -3.38707 | 20.74989 | 7.528814 | 37 | 3 | 2.542373 |
| GO:0008154 | actin polymerization or depolymerization | -2.71062 | 12.18644 | 5.566864 | 63 | 3 | 2.542373 |
| GO:0051258 | protein polymerization | -2.19503 | 7.997352 | 4.300863 | 96 | 3 | 2.542373 |
| GO:0061383 | trabecula morphogenesis | -6.09463 | 29.08128 | 11.67494 | 44 | 5 | 4.237288 |
| GO:0060343 | trabecula formation | -4.01195 | 33.38025 | 9.729812 | 23 | 3 | 2.542373 |
| GO:0061384 | heart trabecula morphogenesis | -3.61734 | 24.76599 | 8.291913 | 31 | 3 | 2.542373 |
| GO:2000251 | positive regulation of actin cytoskeleton reorganization | -6.08591 | 53.8769 | 14.44024 | 19 | 4 | 3.389831 |
| GO:2000249 | regulation of actin cytoskeleton reorganization | -4.65549 | 24.37288 | 9.493668 | 42 | 4 | 3.389831 |
| GO:0043087 | regulation of GTPase activity | -4.02032 | 5.624511 | 5.559616 | 364 | 8 | 6.779661 |
| GO:0090314 | positive regulation of protein targeting to membrane | -3.75102 | 27.41949 | 8.759913 | 28 | 3 | 2.542373 |
| GO:0090313 | regulation of protein targeting to membrane | -3.49679 | 22.58076 | 7.885798 | 34 | 3 | 2.542373 |
| GO:1903533 | regulation of protein targeting | -2.44671 | 9.842894 | 4.897768 | 78 | 3 | 2.542373 |
| GO:0043547 | positive regulation of GTPase activity | -2.35898 | 4.704325 | 3.843732 | 272 | 5 | 4.237288 |
| GO:1904705 | regulation of vascular associated smooth muscle cell proliferation | -5.91303 | 17.64933 | 9.740421 | 87 | 6 | 5.084746 |
| GO:0060391 | positive regulation of SMAD protein signal transduction | -4.34229 | 42.65254 | 11.07139 | 18 | 3 | 2.542373 |
| GO:0043388 | positive regulation of DNA binding | -4.12744 | 17.95897 | 8.026791 | 57 | 4 | 3.389831 |
| GO:0051101 | regulation of DNA binding | -3.93601 | 10.57501 | 6.609958 | 121 | 5 | 4.237288 |
| GO:0048662 | negative regulation of smooth muscle cell proliferation | -3.70814 | 14.02275 | 6.977257 | 73 | 4 | 3.389831 |
| GO:0060390 | regulation of SMAD protein signal transduction | -3.61734 | 24.76599 | 8.291913 | 31 | 3 | 2.542373 |
| GO:0010660 | regulation of muscle cell apoptotic process | -3.53429 | 12.63779 | 6.568878 | 81 | 4 | 3.389831 |
| GO:1904706 | negative regulation of vascular associated smooth muscle cell proliferation | -3.22372 | 18.27966 | 7.018705 | 42 | 3 | 2.542373 |
| GO:0090100 | positive regulation of transmembrane receptor protein serine/threonine kinase signaling pathway | -2.89151 | 8.530508 | 5.176956 | 120 | 4 | 3.389831 |
| GO:0006919 | activation of cysteine-type endopeptidase activity involved in apoptotic process | -2.46252 | 9.970724 | 4.936534 | 77 | 3 | 2.542373 |
| GO:1901216 | positive regulation of neuron death | -5.88374 | 17.44877 | 9.678394 | 88 | 6 | 5.084746 |
| GO:0030900 | forebrain development | -5.64941 | 6.842654 | 7.121099 | 374 | 10 | 8.474576 |
| GO:0033688 | regulation of osteoblast proliferation | -5.37487 | 36.55932 | 11.79041 | 28 | 4 | 3.389831 |
| GO:0021537 | telencephalon development | -5.23245 | 8.322447 | 7.222622 | 246 | 8 | 6.779661 |
| GO:0032465 | regulation of cytokinesis | -4.45852 | 13.61251 | 7.670743 | 94 | 5 | 4.237288 |
| GO:0043525 | positive regulation of neuron apoptotic process | -4.28499 | 19.68579 | 8.446606 | 52 | 4 | 3.389831 |
| GO:0021543 | pallium development | -4.27247 | 9.139831 | 6.62638 | 168 | 6 | 5.084746 |
| GO:0030865 | cortical cytoskeleton organization | -4.03987 | 17.06102 | 7.799656 | 60 | 4 | 3.389831 |
| GO:0007266 | Rho protein signal transduction | -4.01173 | 16.78133 | 7.727561 | 61 | 4 | 3.389831 |
| GO:0007265 | Ras protein signal transduction | -4.00263 | 8.167508 | 6.174448 | 188 | 6 | 5.084746 |
| GO:0051302 | regulation of cell division | -3.98999 | 8.124294 | 6.153624 | 189 | 6 | 5.084746 |
| GO:0051781 | positive regulation of cell division | -3.32345 | 11.12675 | 6.092864 | 92 | 4 | 3.389831 |
| GO:0060071 | Wnt signaling pathway, planar cell polarity pathway | -3.31906 | 19.68579 | 7.313399 | 39 | 3 | 2.542373 |
| GO:0007264 | small GTPase mediated signal transduction | -3.2292 | 5.860655 | 4.949172 | 262 | 6 | 5.084746 |
| GO:0021795 | cerebral cortex cell migration | -3.16411 | 17.44877 | 6.838663 | 44 | 3 | 2.542373 |
| GO:0032467 | positive regulation of cytokinesis | -3.13538 | 17.06102 | 6.75302 | 45 | 3 | 2.542373 |
| GO:0001738 | morphogenesis of a polarized epithelium | -3.02691 | 15.66828 | 6.43613 | 49 | 3 | 2.542373 |
| GO:0021987 | cerebral cortex development | -3.00256 | 9.139831 | 5.405379 | 112 | 4 | 3.389831 |
| GO:0035567 | non-canonical Wnt signaling pathway | -2.97618 | 15.05384 | 6.291323 | 51 | 3 | 2.542373 |
| GO:0050807 | regulation of synapse organization | -2.8519 | 6.122375 | 4.654226 | 209 | 5 | 4.237288 |
| GO:0090175 | regulation of establishment of planar polarity | -2.83588 | 13.46922 | 5.901766 | 57 | 3 | 2.542373 |
| GO:0022029 | telencephalon cell migration | -2.81404 | 13.237 | 5.842533 | 58 | 3 | 2.542373 |
| GO:0050803 | regulation of synapse structure or activity | -2.79787 | 5.951518 | 4.563562 | 215 | 5 | 4.237288 |
| GO:0021885 | forebrain cell migration | -2.75089 | 12.586 | 5.673255 | 61 | 3 | 2.542373 |
| GO:0048857 | neural nucleus development | -2.691 | 11.99603 | 5.515456 | 64 | 3 | 2.542373 |
| GO:0070507 | regulation of microtubule cytoskeleton organization | -2.49732 | 6.647149 | 4.400426 | 154 | 4 | 3.389831 |
| GO:0030901 | midbrain development | -2.34191 | 9.032303 | 4.644688 | 85 | 3 | 2.542373 |
| GO:0045664 | regulation of neuron differentiation | -2.15982 | 5.331568 | 3.771166 | 192 | 4 | 3.389831 |
| GO:1904035 | regulation of epithelial cell apoptotic process | -5.71521 | 16.33502 | 9.326529 | 94 | 6 | 5.084746 |
| GO:0016525 | negative regulation of angiogenesis | -4.56415 | 10.30531 | 7.1317 | 149 | 6 | 5.084746 |
| GO:2000181 | negative regulation of blood vessel morphogenesis | -4.53157 | 10.16882 | 7.074329 | 151 | 6 | 5.084746 |
| GO:1901343 | negative regulation of vasculature development | -4.51545 | 10.10192 | 7.046044 | 152 | 6 | 5.084746 |
| GO:1904036 | negative regulation of epithelial cell apoptotic process | -4.28499 | 19.68579 | 8.446606 | 52 | 4 | 3.389831 |
| GO:2000351 | regulation of endothelial cell apoptotic process | -4.06853 | 17.35019 | 7.873508 | 59 | 4 | 3.389831 |
| GO:2000352 | negative regulation of endothelial cell apoptotic process | -3.49679 | 22.58076 | 7.885798 | 34 | 3 | 2.542373 |
| GO:0030856 | regulation of epithelial cell differentiation | -3.41043 | 8.150167 | 5.625911 | 157 | 5 | 4.237288 |
| GO:0014812 | muscle cell migration | -5.65448 | 42.65254 | 12.78541 | 24 | 4 | 3.389831 |
| GO:0014909 | smooth muscle cell migration | -5.02781 | 69.79507 | 14.29314 | 11 | 3 | 2.542373 |
| GO:2000146 | negative regulation of cell motility | -5.59811 | 6.752381 | 7.058375 | 379 | 10 | 8.474576 |
| GO:0051271 | negative regulation of cellular component movement | -5.51763 | 6.612797 | 6.960342 | 387 | 10 | 8.474576 |
| GO:0040013 | negative regulation of locomotion | -5.25958 | 6.181528 | 6.64891 | 414 | 10 | 8.474576 |
| GO:0033555 | multicellular organismal response to stress | -5.14488 | 18.8173 | 9.212568 | 68 | 5 | 4.237288 |
| GO:0030336 | negative regulation of cell migration | -4.86263 | 6.327575 | 6.404843 | 364 | 9 | 7.627119 |
| GO:0042596 | fear response | -3.61734 | 24.76599 | 8.291913 | 31 | 3 | 2.542373 |
| GO:0034330 | cell junction organization | -5.52705 | 5.876968 | 6.738831 | 479 | 11 | 9.322034 |
| GO:0034329 | cell junction assembly | -5.0329 | 7.814206 | 6.938299 | 262 | 8 | 6.779661 |
| GO:0050808 | synapse organization | -3.83629 | 6.198639 | 5.561881 | 289 | 7 | 5.932203 |
| GO:0045216 | cell-cell junction organization | -3.21857 | 7.396395 | 5.284462 | 173 | 5 | 4.237288 |
| GO:0034332 | adherens junction organization | -3.13538 | 17.06102 | 6.75302 | 45 | 3 | 2.542373 |
| GO:0007416 | synapse assembly | -2.13431 | 7.601443 | 4.162191 | 101 | 3 | 2.542373 |
| GO:0048863 | stem cell differentiation | -5.51641 | 11.33802 | 8.160182 | 158 | 7 | 5.932203 |
| GO:0007595 | lactation | -4.65549 | 24.37288 | 9.493668 | 42 | 4 | 3.389831 |
| GO:0060749 | mammary gland alveolus development | -4.26889 | 40.40767 | 10.7619 | 19 | 3 | 2.542373 |
| GO:0061377 | mammary gland lobule development | -4.26889 | 40.40767 | 10.7619 | 19 | 3 | 2.542373 |
| GO:0007589 | body fluid secretion | -3.82759 | 15.05384 | 7.266643 | 68 | 4 | 3.389831 |
| GO:0014032 | neural crest cell development | -3.53429 | 12.63779 | 6.568878 | 81 | 4 | 3.389831 |
| GO:0048864 | stem cell development | -3.43482 | 11.90304 | 6.341775 | 86 | 4 | 3.389831 |
| GO:0014033 | neural crest cell differentiation | -3.30566 | 11.00711 | 6.053614 | 93 | 4 | 3.389831 |
| GO:0001755 | neural crest cell migration | -2.83588 | 13.46922 | 5.901766 | 57 | 3 | 2.542373 |
| GO:0090497 | mesenchymal cell migration | -2.79261 | 13.01264 | 5.784743 | 59 | 3 | 2.542373 |
| GO:0071559 | response to transforming growth factor beta | -5.51641 | 11.33802 | 8.160182 | 158 | 7 | 5.932203 |
| GO:0071354 | cellular response to interleukin-6 | -5.1922 | 33.02132 | 11.17218 | 31 | 4 | 3.389831 |
| GO:0070741 | response to interleukin-6 | -4.97627 | 29.24746 | 10.47273 | 35 | 4 | 3.389831 |
| GO:0070102 | interleukin-6-mediated signaling pathway | -4.68792 | 54.83898 | 12.61992 | 14 | 3 | 2.542373 |
| GO:0071560 | cellular response to transforming growth factor beta stimulus | -4.53157 | 10.16882 | 7.074329 | 151 | 6 | 5.084746 |
| GO:0008593 | regulation of Notch signaling pathway | -4.39287 | 13.19151 | 7.53246 | 97 | 5 | 4.237288 |
| GO:0007178 | transmembrane receptor protein serine/threonine kinase signaling pathway | -3.98999 | 8.124294 | 6.153624 | 189 | 6 | 5.084746 |
| GO:0007179 | transforming growth factor beta receptor signaling pathway | -3.28808 | 10.89001 | 6.014958 | 94 | 4 | 3.389831 |
| GO:0045747 | positive regulation of Notch signaling pathway | -3.05312 | 15.9947 | 6.511767 | 48 | 3 | 2.542373 |
| GO:0051709 | regulation of killing of cells of another organism | -5.49339 | 95.96822 | 16.8258 | 8 | 3 | 2.542373 |
| GO:0035821 | modulation of process of another organism | -3.90092 | 30.70983 | 9.307754 | 25 | 3 | 2.542373 |
| GO:0031341 | regulation of cell killing | -3.18669 | 10.23661 | 5.794658 | 100 | 4 | 3.389831 |
| GO:0031343 | positive regulation of cell killing | -2.67171 | 11.81147 | 5.465179 | 65 | 3 | 2.542373 |
| GO:0002675 | positive regulation of acute inflammatory response | -5.44051 | 37.91337 | 12.01862 | 27 | 4 | 3.389831 |
| GO:0002673 | regulation of acute inflammatory response | -4.45967 | 21.78002 | 8.929519 | 47 | 4 | 3.389831 |
| GO:0002444 | myeloid leukocyte mediated immunity | -4.31844 | 20.07178 | 8.53765 | 51 | 4 | 3.389831 |
| GO:0002443 | leukocyte mediated immunity | -3.11141 | 5.563375 | 4.770121 | 276 | 6 | 5.084746 |
| GO:0032309 | icosanoid secretion | -5.44051 | 37.91337 | 12.01862 | 27 | 4 | 3.389831 |
| GO:0071715 | icosanoid transport | -4.97627 | 29.24746 | 10.47273 | 35 | 4 | 3.389831 |
| GO:0015909 | long-chain fatty acid transport | -4.25221 | 19.31436 | 8.35807 | 53 | 4 | 3.389831 |
| GO:0050482 | arachidonic acid secretion | -3.9552 | 31.98941 | 9.512319 | 24 | 3 | 2.542373 |
| GO:1903963 | arachidonate transport | -3.9552 | 31.98941 | 9.512319 | 24 | 3 | 2.542373 |
| GO:0015908 | fatty acid transport | -3.73131 | 14.21751 | 7.032816 | 72 | 4 | 3.389831 |
| GO:0006869 | lipid transport | -3.58292 | 5.633355 | 5.202389 | 318 | 7 | 5.932203 |
| GO:0010876 | lipid localization | -3.31113 | 5.074807 | 4.823281 | 353 | 7 | 5.932203 |
| GO:0015718 | monocarboxylic acid transport | -3.23653 | 10.55321 | 5.902399 | 97 | 4 | 3.389831 |
| GO:0015711 | organic anion transport | -2.81728 | 4.874576 | 4.329636 | 315 | 6 | 5.084746 |
| GO:0006820 | anion transport | -2.70703 | 3.98977 | 3.997687 | 449 | 7 | 5.932203 |
| GO:0007568 | aging | -5.39187 | 10.85701 | 7.951917 | 165 | 7 | 5.932203 |
| GO:0051602 | response to electrical stimulus | -4.65549 | 24.37288 | 9.493668 | 42 | 4 | 3.389831 |
| GO:0055093 | response to hyperoxia | -4.26889 | 40.40767 | 10.7619 | 19 | 3 | 2.542373 |
| GO:0060740 | prostate gland epithelium morphogenesis | -4.01195 | 33.38025 | 9.729812 | 23 | 3 | 2.542373 |
| GO:0060512 | prostate gland morphogenesis | -3.90092 | 30.70983 | 9.307754 | 25 | 3 | 2.542373 |
| GO:0036296 | response to increased oxygen levels | -3.84891 | 29.52868 | 9.114867 | 26 | 3 | 2.542373 |
| GO:0030850 | prostate gland development | -3.19355 | 17.85455 | 6.927169 | 43 | 3 | 2.542373 |
| GO:0032526 | response to retinoic acid | -3.04649 | 9.391385 | 5.497016 | 109 | 4 | 3.389831 |
| GO:0014823 | response to activity | -2.65274 | 11.63251 | 5.41599 | 66 | 3 | 2.542373 |
| GO:0043627 | response to estrogen | -2.59763 | 11.12675 | 5.27456 | 69 | 3 | 2.542373 |
| GO:0051640 | organelle localization | -5.34969 | 5.630136 | 6.538816 | 500 | 11 | 9.322034 |
| GO:0051656 | establishment of organelle localization | -3.93926 | 5.474123 | 5.453116 | 374 | 8 | 6.779661 |
| GO:0051648 | vesicle localization | -2.24898 | 5.655586 | 3.934721 | 181 | 4 | 3.389831 |
| GO:0048872 | homeostasis of number of cells | -5.33778 | 8.602193 | 7.374634 | 238 | 8 | 6.779661 |
| GO:0001776 | leukocyte homeostasis | -4.96396 | 17.29157 | 8.788333 | 74 | 5 | 4.237288 |
| GO:0002260 | lymphocyte homeostasis | -4.15773 | 18.27966 | 8.106384 | 56 | 4 | 3.389831 |
| GO:0001782 | B cell homeostasis | -3.799 | 28.43503 | 8.93257 | 27 | 3 | 2.542373 |
| GO:0043029 | T cell homeostasis | -3.49679 | 22.58076 | 7.885798 | 34 | 3 | 2.542373 |
| GO:0097194 | execution phase of apoptosis | -3.02691 | 15.66828 | 6.43613 | 49 | 3 | 2.542373 |
| GO:1905953 | negative regulation of lipid localization | -5.2753 | 19.99338 | 9.526817 | 64 | 5 | 4.237288 |
| GO:0010743 | regulation of macrophage derived foam cell differentiation | -5.13552 | 31.98941 | 10.98534 | 32 | 4 | 3.389831 |
| GO:0032369 | negative regulation of lipid transport | -4.49699 | 22.2535 | 9.035149 | 46 | 4 | 3.389831 |
| GO:0010883 | regulation of lipid storage | -2.88081 | 13.95901 | 6.02482 | 55 | 3 | 2.542373 |
| GO:0031668 | cellular response to extracellular stimulus | -5.25842 | 8.390664 | 7.259972 | 244 | 8 | 6.779661 |
| GO:0031669 | cellular response to nutrient levels | -4.68283 | 8.450032 | 6.817903 | 212 | 7 | 5.932203 |
| GO:0009267 | cellular response to starvation | -4.34554 | 9.420193 | 6.751279 | 163 | 6 | 5.084746 |
| GO:0042752 | regulation of circadian rhythm | -3.98742 | 10.84387 | 6.710452 | 118 | 5 | 4.237288 |
| GO:0042594 | response to starvation | -3.8676 | 7.716038 | 5.953471 | 199 | 6 | 5.084746 |
| GO:0034198 | cellular response to amino acid starvation | -3.07991 | 16.33502 | 6.58971 | 47 | 3 | 2.542373 |
| GO:1990928 | response to amino acid starvation | -3.02691 | 15.66828 | 6.43613 | 49 | 3 | 2.542373 |
| GO:0046890 | regulation of lipid biosynthetic process | -5.19132 | 10.12094 | 7.622506 | 177 | 7 | 5.932203 |
| GO:0071470 | cellular response to osmotic stress | -4.78536 | 26.24772 | 9.881661 | 39 | 4 | 3.389831 |
| GO:0046889 | positive regulation of lipid biosynthetic process | -4.59691 | 14.54064 | 7.967262 | 88 | 5 | 4.237288 |
| GO:0009408 | response to heat | -4.37148 | 13.0569 | 7.487718 | 98 | 5 | 4.237288 |
| GO:0006970 | response to osmotic stress | -3.64064 | 13.46922 | 6.816922 | 76 | 4 | 3.389831 |
| GO:0002761 | regulation of myeloid leukocyte differentiation | -5.12005 | 12.90329 | 8.148784 | 119 | 6 | 5.084746 |
| GO:0045670 | regulation of osteoclast differentiation | -3.87804 | 15.51002 | 7.391113 | 66 | 4 | 3.389831 |
| GO:1902106 | negative regulation of leukocyte differentiation | -2.11095 | 7.453842 | 4.109356 | 103 | 3 | 2.542373 |
| GO:1903707 | negative regulation of hemopoiesis | -2.06571 | 7.175194 | 4.00782 | 107 | 3 | 2.542373 |
| GO:0042742 | defense response to bacterium | -4.98806 | 6.56193 | 6.564667 | 351 | 9 | 7.627119 |
| GO:0050829 | defense response to Gram-negative bacterium | -4.66998 | 15.05384 | 8.126647 | 85 | 5 | 4.237288 |
| GO:0001906 | cell killing | -2.24619 | 8.345063 | 4.419233 | 92 | 3 | 2.542373 |
| GO:0006959 | humoral immune response | -2.23658 | 4.397169 | 3.647214 | 291 | 5 | 4.237288 |
| GO:0045777 | positive regulation of blood pressure | -4.92643 | 28.43503 | 10.31598 | 36 | 4 | 3.389831 |
| GO:0050795 | regulation of behavior | -3.73131 | 14.21751 | 7.032816 | 72 | 4 | 3.389831 |
| GO:0051048 | negative regulation of secretion | -2.34466 | 6.021535 | 4.112271 | 170 | 4 | 3.389831 |
| GO:0008277 | regulation of G protein-coupled receptor signaling pathway | -4.77037 | 11.20797 | 7.500355 | 137 | 6 | 5.084746 |
| GO:0050918 | positive chemotaxis | -3.10733 | 16.69013 | 6.670083 | 46 | 3 | 2.542373 |
| GO:0045744 | negative regulation of G protein-coupled receptor signaling pathway | -3.02691 | 15.66828 | 6.43613 | 49 | 3 | 2.542373 |
| GO:0055123 | digestive system development | -4.73466 | 11.0467 | 7.435799 | 139 | 6 | 5.084746 |
| GO:0035272 | exocrine system development | -4.61439 | 23.80607 | 9.373224 | 43 | 4 | 3.389831 |
| GO:0060571 | morphogenesis of an epithelial fold | -4.50331 | 47.98411 | 11.77392 | 16 | 3 | 2.542373 |
| GO:0048546 | digestive tract morphogenesis | -4.42319 | 21.32627 | 8.827113 | 48 | 4 | 3.389831 |
| GO:0048565 | digestive tract development | -3.83725 | 10.0754 | 6.419155 | 127 | 5 | 4.237288 |
| GO:0008544 | epidermis development | -3.71043 | 5.912234 | 5.382512 | 303 | 7 | 5.932203 |
| GO:0007435 | salivary gland morphogenesis | -3.70483 | 26.47399 | 8.596062 | 29 | 3 | 2.542373 |
| GO:0007431 | salivary gland development | -3.61734 | 24.76599 | 8.291913 | 31 | 3 | 2.542373 |
| GO:0042303 | molting cycle | -3.28808 | 10.89001 | 6.014958 | 94 | 4 | 3.389831 |
| GO:0042633 | hair cycle | -3.28808 | 10.89001 | 6.014958 | 94 | 4 | 3.389831 |
| GO:0043588 | skin development | -3.2554 | 5.928539 | 4.989229 | 259 | 6 | 5.084746 |
| GO:0090263 | positive regulation of canonical Wnt signaling pathway | -3.04649 | 9.391385 | 5.497016 | 109 | 4 | 3.389831 |
| GO:0030177 | positive regulation of Wnt signaling pathway | -2.60221 | 7.108757 | 4.602215 | 144 | 4 | 3.389831 |
| GO:0003151 | outflow tract morphogenesis | -2.47855 | 10.10192 | 4.976016 | 76 | 3 | 2.542373 |
| GO:0001942 | hair follicle development | -2.46252 | 9.970724 | 4.936534 | 77 | 3 | 2.542373 |
| GO:0060828 | regulation of canonical Wnt signaling pathway | -2.43465 | 4.902591 | 3.966004 | 261 | 5 | 4.237288 |
| GO:0002065 | columnar/cuboidal epithelial cell differentiation | -2.41575 | 9.596822 | 4.822296 | 80 | 3 | 2.542373 |
| GO:0022404 | molting cycle process | -2.40059 | 9.478343 | 4.785547 | 81 | 3 | 2.542373 |
| GO:0022405 | hair cycle process | -2.40059 | 9.478343 | 4.785547 | 81 | 3 | 2.542373 |
| GO:0098773 | skin epidermis development | -2.40059 | 9.478343 | 4.785547 | 81 | 3 | 2.542373 |
| GO:0042326 | negative regulation of phosphorylation | -4.6973 | 6.029417 | 6.19596 | 382 | 9 | 7.627119 |
| GO:0045936 | negative regulation of phosphate metabolic process | -4.22107 | 5.23463 | 5.604333 | 440 | 9 | 7.627119 |
| GO:0010563 | negative regulation of phosphorus metabolic process | -4.21352 | 5.22276 | 5.595065 | 441 | 9 | 7.627119 |
| GO:0043409 | negative regulation of MAPK cascade | -4.10653 | 8.530508 | 6.346783 | 180 | 6 | 5.084746 |
| GO:0051348 | negative regulation of transferase activity | -4.00891 | 6.610357 | 5.810688 | 271 | 7 | 5.932203 |
| GO:0071901 | negative regulation of protein serine/threonine kinase activity | -3.91918 | 10.48833 | 6.577239 | 122 | 5 | 4.237288 |
| GO:0006469 | negative regulation of protein kinase activity | -3.70745 | 7.20888 | 5.695542 | 213 | 6 | 5.084746 |
| GO:0031400 | negative regulation of protein modification process | -3.67524 | 4.429302 | 4.940537 | 520 | 9 | 7.627119 |
| GO:0033673 | negative regulation of kinase activity | -3.45897 | 6.478867 | 5.3036 | 237 | 6 | 5.084746 |
| GO:0001933 | negative regulation of protein phosphorylation | -3.40819 | 5.268843 | 4.957963 | 340 | 7 | 5.932203 |
| GO:0043407 | negative regulation of MAP kinase activity | -2.77157 | 12.79576 | 5.728335 | 60 | 3 | 2.542373 |
| GO:1900076 | regulation of cellular response to insulin stimulus | -2.59763 | 11.12675 | 5.27456 | 69 | 3 | 2.542373 |
| GO:0035023 | regulation of Rho protein signal transduction | -4.62096 | 14.70777 | 8.019512 | 87 | 5 | 4.237288 |
| GO:0031032 | actomyosin structure organization | -4.13184 | 11.63251 | 6.997123 | 110 | 5 | 4.237288 |
| GO:0046578 | regulation of Ras protein signal transduction | -4.01534 | 8.211185 | 6.195426 | 187 | 6 | 5.084746 |
| GO:0051057 | positive regulation of small GTPase mediated signal transduction | -3.77871 | 14.62373 | 7.14733 | 70 | 4 | 3.389831 |
| GO:0051056 | regulation of small GTPase mediated signal transduction | -3.74569 | 5.991327 | 5.432594 | 299 | 7 | 5.932203 |
| GO:0010712 | regulation of collagen metabolic process | -3.16411 | 17.44877 | 6.838663 | 44 | 3 | 2.542373 |
| GO:0046579 | positive regulation of Ras protein signal transduction | -2.73058 | 12.383 | 5.619448 | 62 | 3 | 2.542373 |
| GO:2001028 | positive regulation of endothelial cell chemotaxis | -4.59225 | 51.18305 | 12.17602 | 15 | 3 | 2.542373 |
| GO:2001026 | regulation of endothelial cell chemotaxis | -3.9552 | 31.98941 | 9.512319 | 24 | 3 | 2.542373 |
| GO:0003158 | endothelium development | -2.22031 | 8.167508 | 4.359172 | 94 | 3 | 2.542373 |
| GO:0006809 | nitric oxide biosynthetic process | -4.50331 | 47.98411 | 11.77392 | 16 | 3 | 2.542373 |
| GO:0072593 | reactive oxygen species metabolic process | -4.37148 | 13.0569 | 7.487718 | 98 | 5 | 4.237288 |
| GO:0046209 | nitric oxide metabolic process | -4.19955 | 38.38729 | 10.47557 | 20 | 3 | 2.542373 |
| GO:2001057 | reactive nitrogen species metabolic process | -4.13384 | 36.55932 | 10.20961 | 21 | 3 | 2.542373 |
| GO:0006801 | superoxide metabolic process | -3.28644 | 19.19364 | 7.211613 | 40 | 3 | 2.542373 |
| GO:2000378 | negative regulation of reactive oxygen species metabolic process | -4.45967 | 21.78002 | 8.929519 | 47 | 4 | 3.389831 |
| GO:0043457 | regulation of cellular respiration | -3.00127 | 15.35492 | 6.362684 | 50 | 3 | 2.542373 |
| GO:0043502 | regulation of muscle adaptation | -4.43639 | 13.46922 | 7.623955 | 95 | 5 | 4.237288 |
| GO:0010611 | regulation of cardiac muscle hypertrophy | -3.82759 | 15.05384 | 7.266643 | 68 | 4 | 3.389831 |
| GO:0014743 | regulation of muscle hypertrophy | -3.75483 | 14.41776 | 7.089494 | 71 | 4 | 3.389831 |
| GO:0010613 | positive regulation of cardiac muscle hypertrophy | -3.42255 | 21.32627 | 7.642983 | 36 | 3 | 2.542373 |
| GO:0014742 | positive regulation of muscle hypertrophy | -3.38707 | 20.74989 | 7.528814 | 37 | 3 | 2.542373 |
| GO:0030048 | actin filament-based movement | -2.17033 | 7.83414 | 4.244218 | 98 | 3 | 2.542373 |
| GO:0051668 | localization within membrane | -4.40271 | 4.912001 | 5.641464 | 521 | 10 | 8.474576 |
| GO:0072657 | protein localization to membrane | -4.16868 | 5.152656 | 5.54004 | 447 | 9 | 7.627119 |
| GO:0090150 | establishment of protein localization to membrane | -2.75417 | 5.816256 | 4.490591 | 220 | 5 | 4.237288 |
| GO:0051205 | protein insertion into membrane | -2.73058 | 12.383 | 5.619448 | 62 | 3 | 2.542373 |
| GO:0072655 | establishment of protein localization to mitochondrion | -2.51131 | 10.37494 | 5.057224 | 74 | 3 | 2.542373 |
| GO:0070585 | protein localization to mitochondrion | -2.38563 | 9.362753 | 4.749431 | 82 | 3 | 2.542373 |
| GO:0006457 | protein folding | -2.03319 | 4.8979 | 3.541659 | 209 | 4 | 3.389831 |
| GO:0010310 | regulation of hydrogen peroxide metabolic process | -4.19955 | 38.38729 | 10.47557 | 20 | 3 | 2.542373 |
| GO:1903320 | regulation of protein modification by small protein conjugation or removal | -4.17383 | 7.025125 | 6.051631 | 255 | 7 | 5.932203 |
| GO:0031396 | regulation of protein ubiquitination | -3.70745 | 7.20888 | 5.695542 | 213 | 6 | 5.084746 |
| GO:0014044 | Schwann cell development | -3.61734 | 24.76599 | 8.291913 | 31 | 3 | 2.542373 |
| GO:0014037 | Schwann cell differentiation | -3.42255 | 21.32627 | 7.642983 | 36 | 3 | 2.542373 |
| GO:0051651 | maintenance of location in cell | -3.30566 | 11.00711 | 6.053614 | 93 | 4 | 3.389831 |
| GO:0060078 | regulation of postsynaptic membrane potential | -3.30566 | 11.00711 | 6.053614 | 93 | 4 | 3.389831 |
| GO:0021782 | glial cell development | -3.06142 | 9.478343 | 5.528353 | 108 | 4 | 3.389831 |
| GO:0060079 | excitatory postsynaptic potential | -2.79261 | 13.01264 | 5.784743 | 59 | 3 | 2.542373 |
| GO:1905114 | cell surface receptor signaling pathway involved in cell-cell signaling | -2.74213 | 4.710097 | 4.218382 | 326 | 6 | 5.084746 |
| GO:0099536 | synaptic signaling | -2.7344 | 4.0347 | 4.034768 | 444 | 7 | 5.932203 |
| GO:0099565 | chemical synaptic transmission, postsynaptic | -2.71062 | 12.18644 | 5.566864 | 63 | 3 | 2.542373 |
| GO:0007422 | peripheral nervous system development | -2.46252 | 9.970724 | 4.936534 | 77 | 3 | 2.542373 |
| GO:0051235 | maintenance of location | -2.4284 | 6.358143 | 4.269558 | 161 | 4 | 3.389831 |
| GO:0031397 | negative regulation of protein ubiquitination | -2.35629 | 9.139831 | 4.679019 | 84 | 3 | 2.542373 |
| GO:0007268 | chemical synaptic transmission | -2.31641 | 3.858019 | 3.594864 | 398 | 6 | 5.084746 |
| GO:0098916 | anterograde trans-synaptic signaling | -2.31641 | 3.858019 | 3.594864 | 398 | 6 | 5.084746 |
| GO:0099537 | trans-synaptic signaling | -2.22981 | 3.69998 | 3.46884 | 415 | 6 | 5.084746 |
| GO:1903321 | negative regulation of protein modification by small protein conjugation or removal | -2.19503 | 7.997352 | 4.300863 | 96 | 3 | 2.542373 |
| GO:0051590 | positive regulation of neurotransmitter transport | -4.07141 | 34.89753 | 9.96168 | 22 | 3 | 2.542373 |
| GO:0045921 | positive regulation of exocytosis | -3.45421 | 12.04307 | 6.385667 | 85 | 4 | 3.389831 |
| GO:0051588 | regulation of neurotransmitter transport | -3.20312 | 10.34001 | 5.830058 | 99 | 4 | 3.389831 |
| GO:1903307 | positive regulation of regulated secretory pathway | -3.00127 | 15.35492 | 6.362684 | 50 | 3 | 2.542373 |
| GO:0017157 | regulation of exocytosis | -2.86108 | 6.151809 | 4.669681 | 208 | 5 | 4.237288 |
| GO:0001505 | regulation of neurotransmitter levels | -2.83369 | 6.064343 | 4.623616 | 211 | 5 | 4.237288 |
| GO:1903305 | regulation of regulated secretory pathway | -2.6465 | 7.311864 | 4.68841 | 140 | 4 | 3.389831 |
| GO:0042476 | odontogenesis | -3.93601 | 10.57501 | 6.609958 | 121 | 5 | 4.237288 |
| GO:0010812 | negative regulation of cell-substrate adhesion | -3.87804 | 15.51002 | 7.391113 | 66 | 4 | 3.389831 |
| GO:0001953 | negative regulation of cell-matrix adhesion | -3.28644 | 19.19364 | 7.211613 | 40 | 3 | 2.542373 |
| GO:0070613 | regulation of protein processing | -2.61571 | 11.29038 | 5.320718 | 68 | 3 | 2.542373 |
| GO:1903317 | regulation of protein maturation | -2.56231 | 10.81332 | 5.185029 | 71 | 3 | 2.542373 |
| GO:0060760 | positive regulation of response to cytokine stimulus | -3.90389 | 15.74863 | 7.455404 | 65 | 4 | 3.389831 |
| GO:0001961 | positive regulation of cytokine-mediated signaling pathway | -2.81404 | 13.237 | 5.842533 | 58 | 3 | 2.542373 |
| GO:0051607 | defense response to virus | -2.51424 | 5.118305 | 4.095327 | 250 | 5 | 4.237288 |
| GO:0140546 | defense response to symbiont | -2.50683 | 5.097913 | 4.083259 | 251 | 5 | 4.237288 |
| GO:0046683 | response to organophosphorus | -3.85335 | 10.15537 | 6.450062 | 126 | 5 | 4.237288 |
| GO:0014074 | response to purine-containing compound | -3.63987 | 9.139831 | 6.046211 | 140 | 5 | 4.237288 |
| GO:0051591 | response to cAMP | -3.37812 | 11.50181 | 6.214339 | 89 | 4 | 3.389831 |
| GO:0042176 | regulation of protein catabolic process | -3.01205 | 4.51236 | 4.412277 | 397 | 7 | 5.932203 |
| GO:0042177 | negative regulation of protein catabolic process | -2.81349 | 8.124294 | 5.019147 | 126 | 4 | 3.389831 |
| GO:0003014 | renal system process | -3.00256 | 9.139831 | 5.405379 | 112 | 4 | 3.389831 |
| GO:0001823 | mesonephros development | -2.3137 | 8.824664 | 4.577694 | 87 | 3 | 2.542373 |
| GO:0070169 | positive regulation of biomineral tissue development | -2.88081 | 13.95901 | 6.02482 | 55 | 3 | 2.542373 |
| GO:0110151 | positive regulation of biomineralization | -2.85813 | 13.70975 | 5.962506 | 56 | 3 | 2.542373 |
| GO:0022600 | digestive system process | -2.52806 | 10.51707 | 5.098999 | 73 | 3 | 2.542373 |
| GO:0007586 | digestion | -2.06571 | 7.175194 | 4.00782 | 107 | 3 | 2.542373 |
| GO:0002763 | positive regulation of myeloid leukocyte differentiation | -2.85813 | 13.70975 | 5.962506 | 56 | 3 | 2.542373 |
| GO:0071479 | cellular response to ionizing radiation | -2.52806 | 10.51707 | 5.098999 | 73 | 3 | 2.542373 |
| GO:0061448 | connective tissue development | -2.01909 | 4.851474 | 3.516298 | 211 | 4 | 3.389831 |
| GO:0009914 | hormone transport | -2.34191 | 9.032303 | 4.644688 | 85 | 3 | 2.542373 |
| GO:0006575 | cellular modified amino acid metabolic process | -2.26587 | 5.718777 | 3.9659 | 179 | 4 | 3.389831 |

**Table S4.** GO BP enrichment analysis.

| **GO** | **Description** | **LogP** | **Enrichment** | **Z-score** | **#GeneInGO** | **#GeneInGOAndHitList** | **%InGO** |
| --- | --- | --- | --- | --- | --- | --- | --- |
| GO:0045121 | membrane raft | -19.0142 | 16.48534 | 17.60684 | 326 | 21 | 17.79661 |
| GO:0098857 | membrane microdomain | -18.9867 | 16.43492 | 17.57671 | 327 | 21 | 17.79661 |
| GO:0005901 | caveola | -8.92193 | 24.96734 | 13.61169 | 82 | 8 | 6.779661 |
| GO:0044853 | plasma membrane raft | -7.80848 | 18.11789 | 11.41822 | 113 | 8 | 6.779661 |
| GO:0005925 | focal adhesion | -17.9718 | 13.37324 | 16.01283 | 421 | 22 | 18.64407 |
| GO:0030055 | cell-substrate junction | -17.7765 | 13.09334 | 15.81939 | 430 | 22 | 18.64407 |
| GO:0031252 | cell leading edge | -10.0098 | 9.205585 | 10.56798 | 417 | 15 | 12.71186 |
| GO:0031256 | leading edge membrane | -8.7032 | 14.54064 | 11.28391 | 176 | 10 | 8.474576 |
| GO:0001726 | ruffle | -7.46333 | 13.01264 | 10.03914 | 177 | 9 | 7.627119 |
| GO:0031253 | cell projection membrane | -6.98835 | 8.279611 | 8.45476 | 340 | 11 | 9.322034 |
| GO:0030027 | lamellipodium | -6.97096 | 11.40216 | 9.29077 | 202 | 9 | 7.627119 |
| GO:0032587 | ruffle membrane | -6.95216 | 18.46811 | 10.79258 | 97 | 7 | 5.932203 |
| GO:0030667 | secretory granule membrane | -3.63306 | 5.741688 | 5.273032 | 312 | 7 | 5.932203 |
| GO:0043235 | receptor complex | -17.9243 | 11.29038 | 15.16957 | 544 | 24 | 20.33898 |
| GO:0098797 | plasma membrane protein complex | -7.72275 | 5.758993 | 8.043009 | 711 | 16 | 13.55932 |
| GO:0098802 | plasma membrane signaling receptor complex | -7.25414 | 8.797087 | 8.782448 | 320 | 11 | 9.322034 |
| GO:0031983 | vesicle lumen | -13.8764 | 13.30446 | 14.01186 | 327 | 17 | 14.40678 |
| GO:0034774 | secretory granule lumen | -12.7743 | 12.71629 | 13.23856 | 322 | 16 | 13.55932 |
| GO:0060205 | cytoplasmic vesicle lumen | -12.7125 | 12.5989 | 13.1675 | 325 | 16 | 13.55932 |
| GO:0000323 | lytic vacuole | -6.68608 | 5.194491 | 7.230635 | 739 | 15 | 12.71186 |
| GO:0005764 | lysosome | -6.68608 | 5.194491 | 7.230635 | 739 | 15 | 12.71186 |
| GO:0005775 | vacuolar lumen | -6.35535 | 11.76622 | 8.920466 | 174 | 8 | 6.779661 |
| GO:0035578 | azurophil granule lumen | -3.34145 | 11.24902 | 6.132723 | 91 | 4 | 3.389831 |
| GO:0005766 | primary lysosome | -2.48726 | 6.604265 | 4.381238 | 155 | 4 | 3.389831 |
| GO:0042582 | azurophil granule | -2.48726 | 6.604265 | 4.381238 | 155 | 4 | 3.389831 |
| GO:0098552 | side of membrane | -13.6062 | 8.243244 | 11.9924 | 683 | 22 | 18.64407 |
| GO:0009897 | external side of plasma membrane | -8.43517 | 7.788725 | 9.189571 | 460 | 14 | 11.86441 |
| GO:0048471 | perinuclear region of cytoplasm | -13.1322 | 7.808787 | 11.5899 | 721 | 22 | 18.64407 |
| GO:0098978 | glutamatergic synapse | -10.5012 | 11.23139 | 11.50617 | 319 | 14 | 11.86441 |
| GO:0098794 | postsynapse | -7.73008 | 6.252001 | 8.235018 | 614 | 15 | 12.71186 |
| GO:0097060 | synaptic membrane | -3.16989 | 4.802699 | 4.628499 | 373 | 7 | 5.932203 |
| GO:0098793 | presynapse | -3.05404 | 4.030161 | 4.313964 | 508 | 8 | 6.779661 |
| GO:0099572 | postsynaptic specialization | -2.64446 | 4.502908 | 4.074429 | 341 | 6 | 5.084746 |
| GO:0014069 | postsynaptic density | -2.07847 | 4.023825 | 3.395188 | 318 | 5 | 4.237288 |
| GO:0032279 | asymmetric synapse | -2.051 | 3.961536 | 3.351571 | 323 | 5 | 4.237288 |
| GO:0030139 | endocytic vesicle | -9.01743 | 9.727773 | 10.16681 | 342 | 13 | 11.01695 |
| GO:0045335 | phagocytic vesicle | -4.75245 | 11.12675 | 7.467911 | 138 | 6 | 5.084746 |
| GO:0034451 | centriolar satellite | -2.05469 | 7.108757 | 3.983251 | 108 | 3 | 2.542373 |
| GO:0030425 | dendrite | -8.64815 | 6.701545 | 8.917573 | 611 | 16 | 13.55932 |
| GO:0097447 | dendritic tree | -8.62796 | 6.67968 | 8.898204 | 613 | 16 | 13.55932 |
| GO:0030424 | axon | -7.57403 | 6.083564 | 8.082828 | 631 | 15 | 12.71186 |
| GO:0044297 | cell body | -4.21302 | 4.66148 | 5.422778 | 549 | 10 | 8.474576 |
| GO:0043025 | neuronal cell body | -3.91399 | 4.768607 | 5.229384 | 483 | 9 | 7.627119 |
| GO:0150034 | distal axon | -3.14434 | 5.645189 | 4.820005 | 272 | 6 | 5.084746 |
| GO:0030426 | growth cone | -2.41883 | 6.318895 | 4.251497 | 162 | 4 | 3.389831 |
| GO:0030427 | site of polarized growth | -2.36282 | 6.09322 | 4.14623 | 168 | 4 | 3.389831 |
| GO:0101002 | ficolin-1-rich granule | -8.49374 | 13.83326 | 10.9661 | 185 | 10 | 8.474576 |
| GO:1904813 | ficolin-1-rich granule lumen | -7.49124 | 16.51066 | 10.84001 | 124 | 8 | 6.779661 |
| GO:0042470 | melanosome | -5.34019 | 14.08708 | 8.573064 | 109 | 6 | 5.084746 |
| GO:0048770 | pigment granule | -5.34019 | 14.08708 | 8.573064 | 109 | 6 | 5.084746 |
| GO:0043202 | lysosomal lumen | -3.23653 | 10.55321 | 5.902399 | 97 | 4 | 3.389831 |
| GO:0005911 | cell-cell junction | -7.95577 | 7.137079 | 8.684575 | 502 | 14 | 11.86441 |
| GO:0031968 | organelle outer membrane | -7.55501 | 11.03083 | 9.606174 | 232 | 10 | 8.474576 |
| GO:0019867 | outer membrane | -7.51982 | 10.93655 | 9.557133 | 234 | 10 | 8.474576 |
| GO:0005741 | mitochondrial outer membrane | -6.91641 | 11.2353 | 9.209832 | 205 | 9 | 7.627119 |
| GO:0031966 | mitochondrial membrane | -4.4714 | 4.155593 | 5.43974 | 739 | 12 | 10.16949 |
| GO:0005740 | mitochondrial envelope | -4.20385 | 3.897187 | 5.161501 | 788 | 12 | 10.16949 |
| GO:0005635 | nuclear envelope | -2.52071 | 3.693622 | 3.745573 | 485 | 7 | 5.932203 |
| GO:1904090 | peptidase inhibitor complex | -7.14528 | 93.06009 | 19.12678 | 11 | 4 | 3.389831 |
| GO:0097179 | protease inhibitor complex | -5.49339 | 95.96822 | 16.8258 | 8 | 3 | 2.542373 |
| GO:0005769 | early endosome | -7.10724 | 7.490203 | 8.287308 | 410 | 12 | 10.16949 |
| GO:0030666 | endocytic vesicle membrane | -2.99517 | 6.595754 | 4.897268 | 194 | 5 | 4.237288 |
| GO:0030136 | clathrin-coated vesicle | -2.83369 | 6.064343 | 4.623616 | 211 | 5 | 4.237288 |
| GO:0030665 | clathrin-coated vesicle membrane | -2.7395 | 7.755008 | 4.871458 | 132 | 4 | 3.389831 |
| GO:0030669 | clathrin-coated endocytic vesicle membrane | -2.54506 | 10.66314 | 5.141592 | 72 | 3 | 2.542373 |
| GO:0045334 | clathrin-coated endocytic vesicle | -2.25936 | 8.436767 | 4.44995 | 91 | 3 | 2.542373 |
| GO:0030135 | coated vesicle | -2.12927 | 4.141024 | 3.475992 | 309 | 5 | 4.237288 |
| GO:0030662 | coated vesicle membrane | -2.12125 | 5.196249 | 3.700927 | 197 | 4 | 3.389831 |
| GO:0031234 | extrinsic component of cytoplasmic side of plasma membrane | -6.89092 | 18.09502 | 10.67075 | 99 | 7 | 5.932203 |
| GO:0019898 | extrinsic component of membrane | -5.3766 | 7.335151 | 7.067835 | 314 | 9 | 7.627119 |
| GO:0019897 | extrinsic component of plasma membrane | -5.30641 | 10.53769 | 7.81067 | 170 | 7 | 5.932203 |
| GO:0009898 | cytoplasmic side of plasma membrane | -5.25646 | 10.35495 | 7.728712 | 173 | 7 | 5.932203 |
| GO:0098562 | cytoplasmic side of membrane | -4.79035 | 8.781406 | 6.984574 | 204 | 7 | 5.932203 |
| GO:0043197 | dendritic spine | -4.21573 | 8.927276 | 6.530155 | 172 | 6 | 5.084746 |
| GO:0044309 | neuron spine | -4.20177 | 8.875674 | 6.506587 | 173 | 6 | 5.084746 |
| GO:0005938 | cell cortex | -3.65003 | 5.778732 | 5.296989 | 310 | 7 | 5.932203 |
| GO:0070820 | tertiary granule | -5.4093 | 10.92321 | 7.980895 | 164 | 7 | 5.932203 |
| GO:0042581 | specific granule | -4.39059 | 9.596822 | 6.828832 | 160 | 6 | 5.084746 |
| GO:0035580 | specific granule lumen | -3.98407 | 16.51066 | 7.657153 | 62 | 4 | 3.389831 |
| GO:1904724 | tertiary granule lumen | -2.88081 | 13.95901 | 6.02482 | 55 | 3 | 2.542373 |
| GO:0045177 | apical part of cell | -5.13339 | 5.979328 | 6.498112 | 428 | 10 | 8.474576 |
| GO:0016324 | apical plasma membrane | -4.04515 | 5.671252 | 5.592337 | 361 | 8 | 6.779661 |
| GO:0031012 | extracellular matrix | -4.80992 | 4.930066 | 5.938244 | 571 | 11 | 9.322034 |
| GO:0030312 | external encapsulating structure | -4.80291 | 4.921447 | 5.930508 | 572 | 11 | 9.322034 |
| GO:0062023 | collagen-containing extracellular matrix | -3.53534 | 4.772312 | 4.928766 | 429 | 8 | 6.779661 |
| GO:0098636 | protein complex involved in cell adhesion | -4.28499 | 19.68579 | 8.446606 | 52 | 4 | 3.389831 |
| GO:0098685 | Schaffer collateral - CA1 synapse | -3.73131 | 14.21751 | 7.032816 | 72 | 4 | 3.389831 |
| GO:0098858 | actin-based cell projection | -3.62121 | 6.947925 | 5.558423 | 221 | 6 | 5.084746 |
| GO:0008305 | integrin complex | -3.61734 | 24.76599 | 8.291913 | 31 | 3 | 2.542373 |
| GO:0030175 | filopodium | -3.09176 | 9.657179 | 5.592266 | 106 | 4 | 3.389831 |
| GO:0031594 | neuromuscular junction | -2.61571 | 11.29038 | 5.320718 | 68 | 3 | 2.542373 |
| GO:0061695 | transferase complex, transferring phosphorus-containing groups | -3.99898 | 6.586054 | 5.796279 | 272 | 7 | 5.932203 |
| GO:1902911 | protein kinase complex | -3.91918 | 10.48833 | 6.577239 | 122 | 5 | 4.237288 |
| GO:1902554 | serine/threonine protein kinase complex | -2.07684 | 7.242885 | 4.032707 | 106 | 3 | 2.542373 |
| GO:0005770 | late endosome | -3.85485 | 6.241835 | 5.588469 | 287 | 7 | 5.932203 |
| GO:0010008 | endosome membrane | -3.56654 | 4.28111 | 4.809616 | 538 | 9 | 7.627119 |
| GO:0032154 | cleavage furrow | -2.90394 | 14.21751 | 6.088779 | 54 | 3 | 2.542373 |
| GO:0032153 | cell division site | -2.54506 | 10.66314 | 5.141592 | 72 | 3 | 2.542373 |
| GO:0055038 | recycling endosome membrane | -2.19503 | 7.997352 | 4.300863 | 96 | 3 | 2.542373 |
| GO:0055037 | recycling endosome | -2.12887 | 5.22276 | 3.714782 | 196 | 4 | 3.389831 |
| GO:0009925 | basal plasma membrane | -3.31793 | 6.09322 | 5.085191 | 252 | 6 | 5.084746 |
| GO:0045178 | basal part of cell | -3.16102 | 5.687006 | 4.84532 | 270 | 6 | 5.084746 |
| GO:0043209 | myelin sheath | -3.13538 | 17.06102 | 6.75302 | 45 | 3 | 2.542373 |
| GO:0005884 | actin filament | -2.98821 | 9.058947 | 5.375595 | 113 | 4 | 3.389831 |
| GO:0015629 | actin cytoskeleton | -2.44348 | 3.575662 | 3.641124 | 501 | 7 | 5.932203 |
| GO:0000139 | Golgi membrane | -2.92465 | 3.47921 | 4.039713 | 662 | 9 | 7.627119 |
| GO:0005788 | endoplasmic reticulum lumen | -2.8454 | 4.937272 | 4.371379 | 311 | 6 | 5.084746 |
| GO:0072562 | blood microparticle | -2.5699 | 6.96368 | 4.539704 | 147 | 4 | 3.389831 |
| GO:0005796 | Golgi lumen | -2.09946 | 7.382171 | 4.083468 | 104 | 3 | 2.542373 |
| GO:0090575 | RNA polymerase II transcription regulator complex | -2.57477 | 5.287505 | 4.194251 | 242 | 5 | 4.237288 |
| GO:0031091 | platelet alpha granule | -2.25936 | 8.436767 | 4.44995 | 91 | 3 | 2.542373 |
| GO:0005902 | microvillus | -2.24619 | 8.345063 | 4.419233 | 92 | 3 | 2.542373 |
| GO:0005903 | brush border | -2.12256 | 7.526919 | 4.135594 | 102 | 3 | 2.542373 |

**Table S5.** GO CC enrichment analysis.

| **GO** | **Description** | **LogP** | **Enrichment** | **Z-score** | **#GeneInGO** | **#GeneInGOAndHitList** | **%InGO** |
| --- | --- | --- | --- | --- | --- | --- | --- |
| GO:0004712 | protein serine/threonine/tyrosine kinase activity | -30.7028 | 18.36163 | 23.13577 | 446 | 32 | 27.11864 |
| GO:0004672 | protein kinase activity | -30.1311 | 15.40021 | 21.64159 | 565 | 34 | 28.81356 |
| GO:0016773 | phosphotransferase activity, alcohol group as acceptor | -28.868 | 13.28937 | 20.20951 | 674 | 35 | 29.66102 |
| GO:0016301 | kinase activity | -27.6909 | 12.26991 | 19.30592 | 730 | 35 | 29.66102 |
| GO:0004713 | protein tyrosine kinase activity | -23.6958 | 35.75287 | 25.44106 | 136 | 19 | 16.10169 |
| GO:0004674 | protein serine/threonine kinase activity | -13.0625 | 10.71273 | 12.7053 | 430 | 18 | 15.25424 |
| GO:0106310 | protein serine kinase activity | -10.8882 | 10.6336 | 11.53317 | 361 | 15 | 12.71186 |
| GO:0019900 | kinase binding | -16.5875 | 8.630086 | 13.44212 | 771 | 26 | 22.0339 |
| GO:0019901 | protein kinase binding | -15.6054 | 8.914319 | 13.16224 | 689 | 24 | 20.33898 |
| GO:0019904 | protein domain specific binding | -11.5733 | 7.450226 | 10.71138 | 687 | 20 | 16.94915 |
| GO:0019199 | transmembrane receptor protein kinase activity | -15.5326 | 38.8732 | 21.11102 | 79 | 12 | 10.16949 |
| GO:0004714 | transmembrane receptor protein tyrosine kinase activity | -15.2313 | 46.9178 | 22.2989 | 60 | 11 | 9.322034 |
| GO:0019838 | growth factor binding | -9.92896 | 19.38752 | 13.26039 | 132 | 10 | 8.474576 |
| GO:0004175 | endopeptidase activity | -13.0112 | 10.63851 | 12.65275 | 433 | 18 | 15.25424 |
| GO:0008233 | peptidase activity | -11.5347 | 7.997352 | 10.91684 | 608 | 19 | 16.10169 |
| GO:0017171 | serine hydrolase activity | -9.46907 | 14.36259 | 11.75513 | 196 | 11 | 9.322034 |
| GO:0008236 | serine-type peptidase activity | -8.33837 | 13.32892 | 10.73385 | 192 | 10 | 8.474576 |
| GO:0004252 | serine-type endopeptidase activity | -7.52748 | 13.237 | 10.13909 | 174 | 9 | 7.627119 |
| GO:0008237 | metallopeptidase activity | -7.2979 | 12.44993 | 9.784036 | 185 | 9 | 7.627119 |
| GO:0004222 | metalloendopeptidase activity | -6.52284 | 15.9947 | 9.957462 | 112 | 7 | 5.932203 |
| GO:0019902 | phosphatase binding | -12.1166 | 17.23782 | 14.17403 | 193 | 13 | 11.01695 |
| GO:0019903 | protein phosphatase binding | -10.7843 | 19.02073 | 13.76464 | 148 | 11 | 9.322034 |
| GO:0051721 | protein phosphatase 2A binding | -3.66031 | 25.59153 | 8.440279 | 30 | 3 | 2.542373 |
| GO:0042803 | protein homodimerization activity | -11.5848 | 7.461086 | 10.72142 | 686 | 20 | 16.94915 |
| GO:0043560 | insulin receptor substrate binding | -9.683 | 127.9576 | 25.14928 | 10 | 5 | 4.237288 |
| GO:0043548 | phosphatidylinositol 3-kinase binding | -7.0355 | 44.12332 | 14.55173 | 29 | 5 | 4.237288 |
| GO:0043559 | insulin binding | -6.23785 | 153.5492 | 21.36612 | 5 | 3 | 2.542373 |
| GO:0031994 | insulin-like growth factor I binding | -4.79141 | 59.05737 | 13.11346 | 13 | 3 | 2.542373 |
| GO:0042562 | hormone binding | -4.62096 | 14.70777 | 8.019512 | 87 | 5 | 4.237288 |
| GO:0005159 | insulin-like growth factor receptor binding | -4.50331 | 47.98411 | 11.77392 | 16 | 3 | 2.542373 |
| GO:0005520 | insulin-like growth factor binding | -4.26889 | 40.40767 | 10.7619 | 19 | 3 | 2.542373 |
| GO:0005158 | insulin receptor binding | -4.07141 | 34.89753 | 9.96168 | 22 | 3 | 2.542373 |
| GO:0017046 | peptide hormone binding | -2.9516 | 14.76434 | 6.221946 | 52 | 3 | 2.542373 |
| GO:0008289 | lipid binding | -9.53191 | 6.100866 | 9.140627 | 797 | 19 | 16.10169 |
| GO:0005543 | phospholipid binding | -3.29126 | 4.383987 | 4.616006 | 467 | 8 | 6.779661 |
| GO:1901981 | phosphatidylinositol phosphate binding | -2.30031 | 5.849492 | 4.029695 | 175 | 4 | 3.389831 |
| GO:0004715 | non-membrane spanning protein tyrosine kinase activity | -9.33141 | 39.80904 | 16.31766 | 45 | 7 | 5.932203 |
| GO:0043274 | phospholipase binding | -7.57505 | 55.63375 | 16.41668 | 23 | 5 | 4.237288 |
| GO:0042169 | SH2 domain binding | -4.69764 | 24.96734 | 9.618375 | 41 | 4 | 3.389831 |
| GO:0042277 | peptide binding | -9.3193 | 10.29999 | 10.5248 | 323 | 13 | 11.01695 |
| GO:0033218 | amide binding | -9.17167 | 8.890356 | 9.987607 | 403 | 14 | 11.86441 |
| GO:0001540 | amyloid-beta binding | -4.72026 | 15.41658 | 8.237471 | 83 | 5 | 4.237288 |
| GO:0005178 | integrin binding | -9.21358 | 16.40482 | 12.08199 | 156 | 10 | 8.474576 |
| GO:0050839 | cell adhesion molecule binding | -6.52839 | 5.972887 | 7.419485 | 557 | 13 | 11.01695 |
| GO:0045296 | cadherin binding | -2.69589 | 4.611086 | 4.150139 | 333 | 6 | 5.084746 |
| GO:0005126 | cytokine receptor binding | -9.08693 | 11.29038 | 10.67764 | 272 | 12 | 10.16949 |
| GO:0001664 | G protein-coupled receptor binding | -4.73639 | 7.108757 | 6.524164 | 288 | 8 | 6.779661 |
| GO:0048020 | CCR chemokine receptor binding | -3.07991 | 16.33502 | 6.58971 | 47 | 3 | 2.542373 |
| GO:0042379 | chemokine receptor binding | -2.56231 | 10.81332 | 5.185029 | 71 | 3 | 2.542373 |
| GO:0019956 | chemokine binding | -8.4974 | 46.53005 | 16.39032 | 33 | 6 | 5.084746 |
| GO:0019960 | C-X3-C chemokine binding | -6.23785 | 153.5492 | 21.36612 | 5 | 3 | 2.542373 |
| GO:0140272 | exogenous protein binding | -6.22759 | 19.94145 | 10.42336 | 77 | 6 | 5.084746 |
| GO:0019955 | cytokine binding | -5.82538 | 12.61554 | 8.689644 | 142 | 7 | 5.932203 |
| GO:0001968 | fibronectin binding | -5.1922 | 33.02132 | 11.17218 | 31 | 4 | 3.389831 |
| GO:0001618 | virus receptor activity | -4.90715 | 16.83653 | 8.657827 | 76 | 5 | 4.237288 |
| GO:0015026 | coreceptor activity | -4.45967 | 21.78002 | 8.929519 | 47 | 4 | 3.389831 |
| GO:0005518 | collagen binding | -3.82759 | 15.05384 | 7.266643 | 68 | 4 | 3.389831 |
| GO:0050840 | extracellular matrix binding | -2.85813 | 13.70975 | 5.962506 | 56 | 3 | 2.542373 |
| GO:0003779 | actin binding | -2.11496 | 3.497703 | 3.301778 | 439 | 6 | 5.084746 |
| GO:0020037 | heme binding | -8.37934 | 16.57005 | 11.52376 | 139 | 9 | 7.627119 |
| GO:0046906 | tetrapyrrole binding | -8.11406 | 15.45797 | 11.08076 | 149 | 9 | 7.627119 |
| GO:0033695 | oxidoreductase activity, acting on CH or CH2 groups, quinone or similar compound as acceptor | -6.63455 | 191.9364 | 23.91897 | 4 | 3 | 2.542373 |
| GO:0034875 | caffeine oxidase activity | -6.63455 | 191.9364 | 23.91897 | 4 | 3 | 2.542373 |
| GO:0016725 | oxidoreductase activity, acting on CH or CH2 groups | -5.31854 | 85.30508 | 15.8429 | 9 | 3 | 2.542373 |
| GO:0016705 | oxidoreductase activity, acting on paired donors, with incorporation or reduction of molecular oxygen | -5.19132 | 10.12094 | 7.622506 | 177 | 7 | 5.932203 |
| GO:0016709 | oxidoreductase activity, acting on paired donors, with incorporation or reduction of molecular oxygen, NAD(P)H as one donor, and incorporation of one atom of oxygen | -4.61439 | 23.80607 | 9.373224 | 43 | 4 | 3.389831 |
| GO:0004497 | monooxygenase activity | -4.26794 | 12.42307 | 7.273414 | 103 | 5 | 4.237288 |
| GO:0070330 | aromatase activity | -3.90092 | 30.70983 | 9.307754 | 25 | 3 | 2.542373 |
| GO:0008395 | steroid hydroxylase activity | -3.35259 | 20.20384 | 7.419047 | 38 | 3 | 2.542373 |
| GO:0016712 | oxidoreductase activity, acting on paired donors, with incorporation or reduction of molecular oxygen, reduced flavin or flavoprotein as one donor, and incorporation of one atom of oxygen | -3.28644 | 19.19364 | 7.211613 | 40 | 3 | 2.542373 |
| GO:0016491 | oxidoreductase activity | -3.19498 | 3.477109 | 4.26125 | 736 | 10 | 8.474576 |
| GO:0005506 | iron ion binding | -2.52796 | 6.779212 | 4.459031 | 151 | 4 | 3.389831 |
| GO:0004708 | MAP kinase kinase activity | -8.16237 | 71.08757 | 18.62952 | 18 | 5 | 4.237288 |
| GO:0004707 | MAP kinase activity | -6.53391 | 68.24407 | 16.31558 | 15 | 4 | 3.389831 |
| GO:0030235 | nitric-oxide synthase regulator activity | -8.11448 | 146.2373 | 24.06979 | 7 | 4 | 3.389831 |
| GO:0051117 | ATPase binding | -3.51387 | 12.48367 | 6.521883 | 82 | 4 | 3.389831 |
| GO:0097110 | scaffold protein binding | -8.07968 | 26.73741 | 13.20929 | 67 | 7 | 5.932203 |
| GO:0016004 | phospholipase activator activity | -6.6673 | 73.11864 | 16.90469 | 14 | 4 | 3.389831 |
| GO:0060229 | lipase activator activity | -6.29509 | 60.21535 | 15.29593 | 17 | 4 | 3.389831 |
| GO:0008047 | enzyme activator activity | -3.47366 | 4.157468 | 4.697961 | 554 | 9 | 7.627119 |
| GO:0019207 | kinase regulator activity | -2.59027 | 5.331568 | 4.219668 | 240 | 5 | 4.237288 |
| GO:0003925 | G protein activity | -6.30682 | 31.98941 | 12.28361 | 40 | 5 | 4.237288 |
| GO:0019001 | guanyl nucleotide binding | -2.98687 | 4.467349 | 4.377916 | 401 | 7 | 5.932203 |
| GO:0032561 | guanyl ribonucleotide binding | -2.98687 | 4.467349 | 4.377916 | 401 | 7 | 5.932203 |
| GO:0017111 | nucleoside-triphosphatase activity | -2.76275 | 3.295046 | 3.845124 | 699 | 9 | 7.627119 |
| GO:0016462 | pyrophosphatase activity | -2.54218 | 3.054691 | 3.578639 | 754 | 9 | 7.627119 |
| GO:0016817 | hydrolase activity, acting on acid anhydrides | -2.53078 | 3.042586 | 3.564806 | 757 | 9 | 7.627119 |
| GO:0016818 | hydrolase activity, acting on acid anhydrides, in phosphorus-containing anhydrides | -2.53078 | 3.042586 | 3.564806 | 757 | 9 | 7.627119 |
| GO:0005525 | GTP binding | -2.4189 | 4.051429 | 3.744211 | 379 | 6 | 5.084746 |
| GO:0002020 | protease binding | -5.95118 | 13.17211 | 8.910669 | 136 | 7 | 5.932203 |
| GO:0016853 | isomerase activity | -2.47727 | 6.56193 | 4.362218 | 156 | 4 | 3.389831 |
| GO:0051219 | phosphoprotein binding | -5.88374 | 17.44877 | 9.678394 | 88 | 6 | 5.084746 |
| GO:0001784 | phosphotyrosine residue binding | -4.57431 | 23.26502 | 9.256803 | 44 | 4 | 3.389831 |
| GO:0045309 | protein phosphorylated amino acid binding | -4.18861 | 18.61202 | 8.188064 | 55 | 4 | 3.389831 |
| GO:0004879 | nuclear receptor activity | -5.72649 | 24.60724 | 10.67127 | 52 | 5 | 4.237288 |
| GO:0098531 | ligand-activated transcription factor activity | -5.72649 | 24.60724 | 10.67127 | 52 | 5 | 4.237288 |
| GO:0008134 | transcription factor binding | -5.40634 | 5.161316 | 6.421039 | 595 | 12 | 10.16949 |
| GO:0061629 | RNA polymerase II-specific DNA-binding transcription factor binding | -5.01777 | 6.618498 | 6.602702 | 348 | 9 | 7.627119 |
| GO:0140297 | DNA-binding transcription factor binding | -4.78211 | 5.445005 | 6.083064 | 470 | 10 | 8.474576 |
| GO:0001223 | transcription coactivator binding | -4.74092 | 25.59153 | 9.747611 | 40 | 4 | 3.389831 |
| GO:0016922 | nuclear receptor binding | -4.73466 | 11.0467 | 7.435799 | 139 | 6 | 5.084746 |
| GO:0001221 | transcription coregulator binding | -4.1507 | 11.73923 | 7.03504 | 109 | 5 | 4.237288 |
| GO:0005496 | steroid binding | -3.18669 | 10.23661 | 5.794658 | 100 | 4 | 3.389831 |
| GO:0031406 | carboxylic acid binding | -5.25646 | 10.35495 | 7.728712 | 173 | 7 | 5.932203 |
| GO:0005516 | calmodulin binding | -3.85574 | 7.677458 | 5.934225 | 200 | 6 | 5.084746 |
| GO:0043177 | organic acid binding | -3.62554 | 9.075009 | 6.019546 | 141 | 5 | 4.237288 |
| GO:0050661 | NADP binding | -2.92753 | 14.48577 | 6.154461 | 53 | 3 | 2.542373 |
| GO:0016597 | amino acid binding | -2.85813 | 13.70975 | 5.962506 | 56 | 3 | 2.542373 |
| GO:0097199 | cysteine-type endopeptidase activity involved in apoptotic signaling pathway | -5.16488 | 76.77458 | 15.01033 | 10 | 3 | 2.542373 |
| GO:0097153 | cysteine-type endopeptidase activity involved in apoptotic process | -4.59225 | 51.18305 | 12.17602 | 15 | 3 | 2.542373 |
| GO:0032813 | tumor necrosis factor receptor superfamily binding | -3.02691 | 15.66828 | 6.43613 | 49 | 3 | 2.542373 |
| GO:0004197 | cysteine-type endopeptidase activity | -2.89151 | 8.530508 | 5.176956 | 120 | 4 | 3.389831 |
| GO:0008234 | cysteine-type peptidase activity | -2.23231 | 5.593776 | 3.904003 | 183 | 4 | 3.389831 |
| GO:0070851 | growth factor receptor binding | -4.73466 | 11.0467 | 7.435799 | 139 | 6 | 5.084746 |
| GO:0008022 | protein C-terminus binding | -3.15172 | 7.148471 | 5.167488 | 179 | 5 | 4.237288 |
| GO:0044389 | ubiquitin-like protein ligase binding | -4.43981 | 6.458429 | 6.119046 | 317 | 8 | 6.779661 |
| GO:0031625 | ubiquitin protein ligase binding | -3.75459 | 6.011432 | 5.445257 | 298 | 7 | 5.932203 |
| GO:0008238 | exopeptidase activity | -4.39287 | 13.19151 | 7.53246 | 97 | 5 | 4.237288 |
| GO:0008235 | metalloexopeptidase activity | -2.65274 | 11.63251 | 5.41599 | 66 | 3 | 2.542373 |
| GO:0046982 | protein heterodimerization activity | -4.29845 | 6.166633 | 5.928872 | 332 | 8 | 6.779661 |
| GO:1990782 | protein tyrosine kinase binding | -2.00129 | 6.79421 | 3.864937 | 113 | 3 | 2.542373 |
| GO:0004620 | phospholipase activity | -4.20842 | 12.07147 | 7.151824 | 106 | 5 | 4.237288 |
| GO:0016493 | C-C chemokine receptor activity | -4.01195 | 33.38025 | 9.729812 | 23 | 3 | 2.542373 |
| GO:0019957 | C-C chemokine binding | -3.9552 | 31.98941 | 9.512319 | 24 | 3 | 2.542373 |
| GO:0001637 | G protein-coupled chemoattractant receptor activity | -3.84891 | 29.52868 | 9.114867 | 26 | 3 | 2.542373 |
| GO:0004435 | phosphatidylinositol phospholipase C activity | -3.84891 | 29.52868 | 9.114867 | 26 | 3 | 2.542373 |
| GO:0004950 | chemokine receptor activity | -3.84891 | 29.52868 | 9.114867 | 26 | 3 | 2.542373 |
| GO:0016298 | lipase activity | -3.78979 | 9.842894 | 6.328457 | 130 | 5 | 4.237288 |
| GO:0004629 | phospholipase C activity | -3.75102 | 27.41949 | 8.759913 | 28 | 3 | 2.542373 |
| GO:0008528 | G protein-coupled peptide receptor activity | -2.54877 | 6.870208 | 4.498996 | 149 | 4 | 3.389831 |
| GO:0001653 | peptide receptor activity | -2.48726 | 6.604265 | 4.381238 | 155 | 4 | 3.389831 |
| GO:0008081 | phosphoric diester hydrolase activity | -2.29986 | 8.724384 | 4.544999 | 88 | 3 | 2.542373 |
| GO:0004896 | cytokine receptor activity | -2.18261 | 7.914905 | 4.272338 | 97 | 3 | 2.542373 |
| GO:0017134 | fibroblast growth factor binding | -4.01195 | 33.38025 | 9.729812 | 23 | 3 | 2.542373 |
| GO:1901681 | sulfur compound binding | -2.37925 | 4.756789 | 3.87642 | 269 | 5 | 4.237288 |
| GO:0004709 | MAP kinase kinase kinase activity | -3.84891 | 29.52868 | 9.114867 | 26 | 3 | 2.542373 |
| GO:0046875 | ephrin receptor binding | -3.75102 | 27.41949 | 8.759913 | 28 | 3 | 2.542373 |
| GO:0048156 | tau protein binding | -3.19355 | 17.85455 | 6.927169 | 43 | 3 | 2.542373 |
| GO:0016209 | antioxidant activity | -3.45421 | 12.04307 | 6.385667 | 85 | 4 | 3.389831 |
| GO:0019825 | oxygen binding | -3.31906 | 19.68579 | 7.313399 | 39 | 3 | 2.542373 |
| GO:0051879 | Hsp90 protein binding | -3.19355 | 17.85455 | 6.927169 | 43 | 3 | 2.542373 |
| GO:0031072 | heat shock protein binding | -2.85197 | 8.322447 | 5.096711 | 123 | 4 | 3.389831 |
| GO:0016247 | channel regulator activity | -2.61315 | 7.158469 | 4.623452 | 143 | 4 | 3.389831 |
| GO:0043621 | protein self-association | -2.59763 | 11.12675 | 5.27456 | 69 | 3 | 2.542373 |
| GO:0033293 | monocarboxylic acid binding | -2.40059 | 9.478343 | 4.785547 | 81 | 3 | 2.542373 |
| GO:0030546 | signaling receptor activator activity | -2.46727 | 3.611707 | 3.673301 | 496 | 7 | 5.932203 |
| GO:0030545 | signaling receptor regulator activity | -2.25088 | 3.293027 | 3.380267 | 544 | 7 | 5.932203 |
| GO:0035591 | signaling adaptor activity | -2.40059 | 9.478343 | 4.785547 | 81 | 3 | 2.542373 |
| GO:0030674 | protein-macromolecule adaptor activity | -2.12354 | 4.127665 | 3.466863 | 310 | 5 | 4.237288 |
| GO:0030165 | PDZ domain binding | -2.38563 | 9.362753 | 4.749431 | 82 | 3 | 2.542373 |
| GO:0051087 | chaperone binding | -2.07684 | 7.242885 | 4.032707 | 106 | 3 | 2.542373 |
| GO:0072341 | modified amino acid binding | -2.23317 | 8.255331 | 4.388978 | 93 | 3 | 2.542373 |

**Table S6.** GO MF enrichment analysis.
